# Supplementary material for: Clonal hematopoiesis in sickle cell disease
Source: JCI journal article supplement (doi:10.1172/jci156060), 2022-01-06
Supplement: sd1 [file 1]

# Supplemental Figure 1

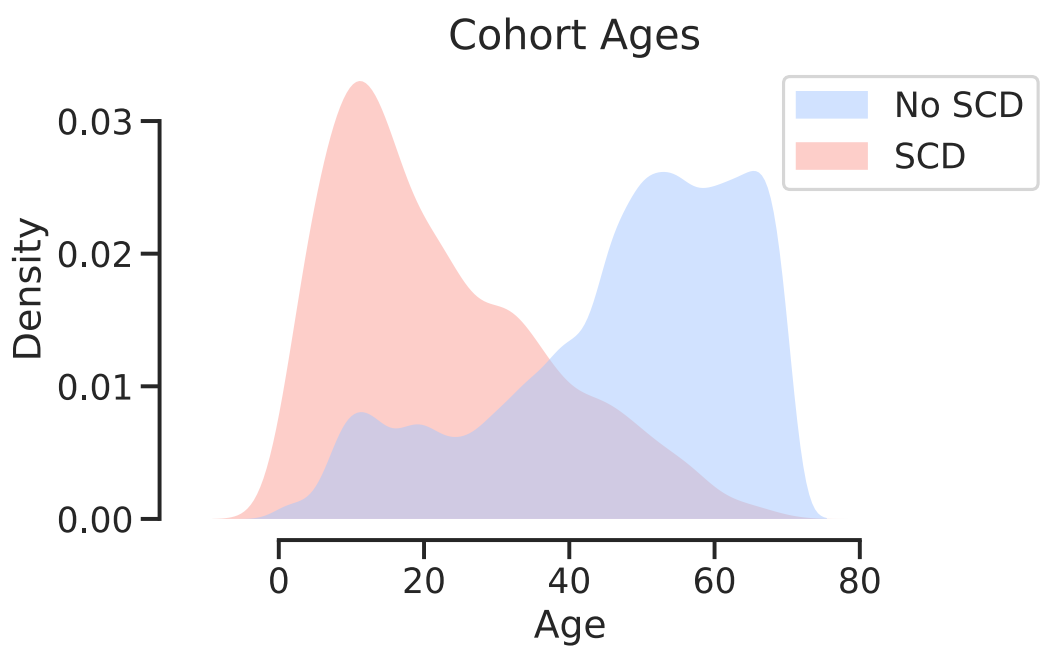

# Supplemental Figure 2

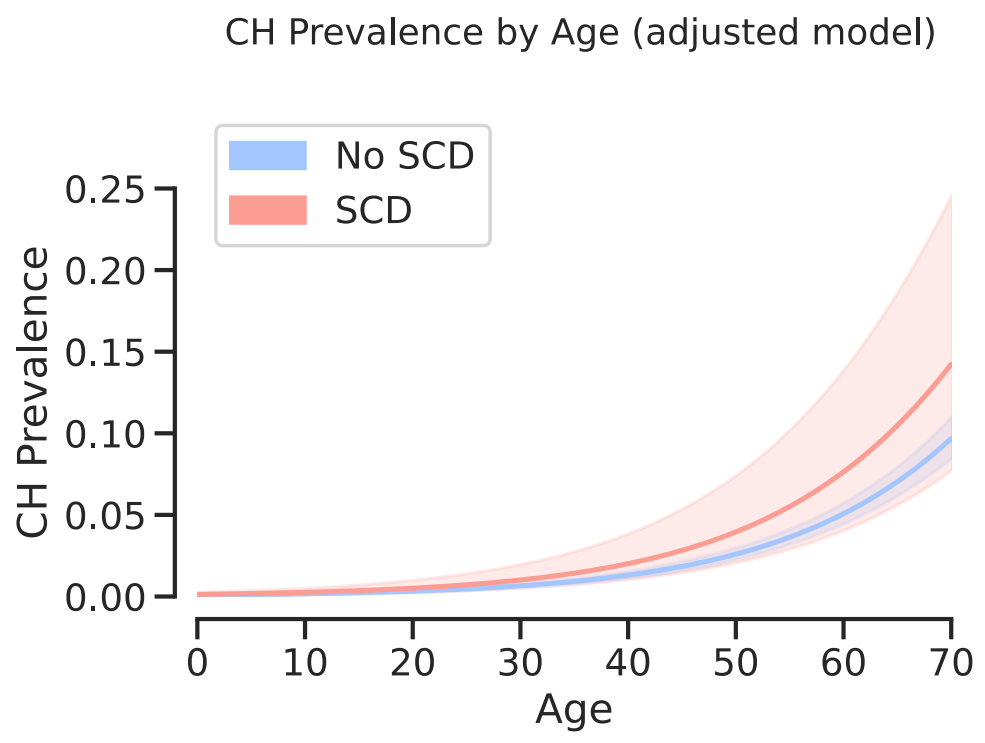

# Supplemental Figure 3

## Sickle Trait in controls

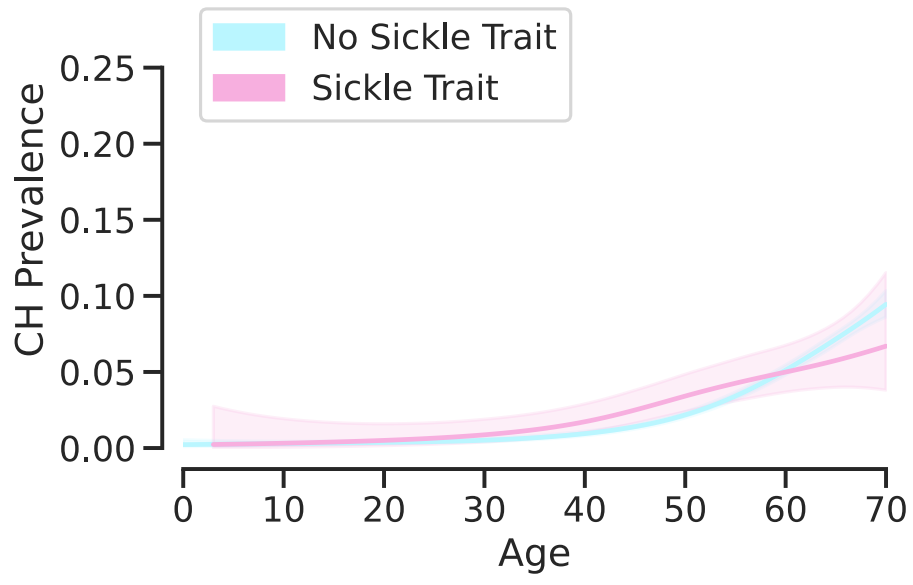

|      |      |      |      |       |       |       |
|------|------|------|------|-------|-------|-------|
| 2500 | 5086 | 4506 | 7577 | 13691 | 17789 | 18065 |
| 43   | 194  | 123  | 233  | 424   | 474   | 364   |

## Individuals by Age Group

# Supplemental Figure 4

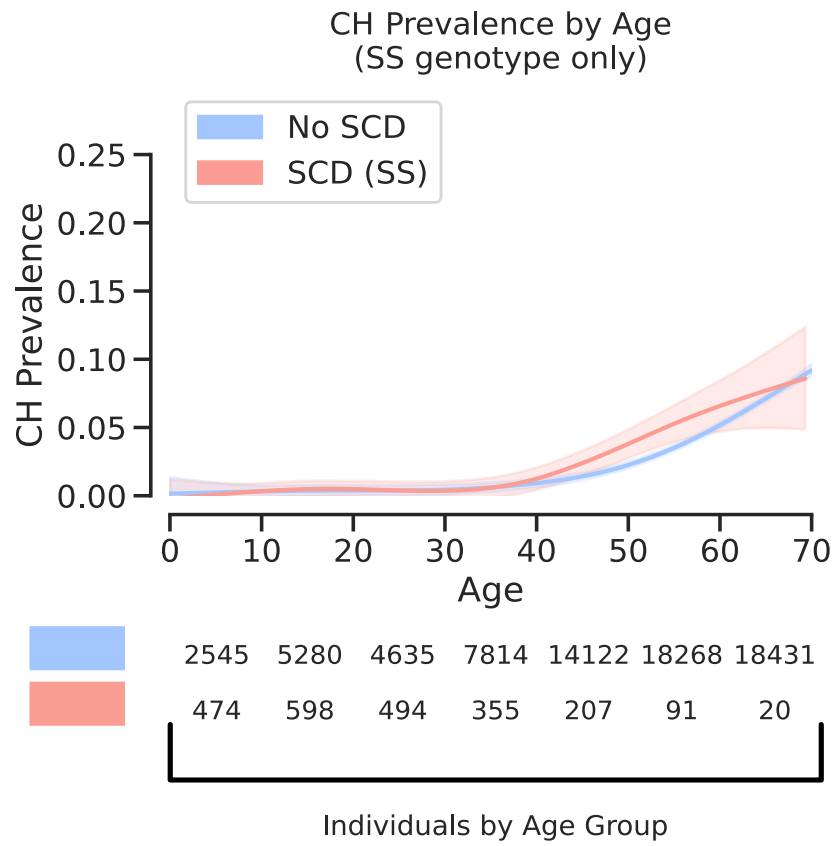

# Supplemental Figure 5

A

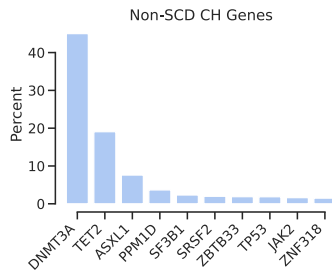

B

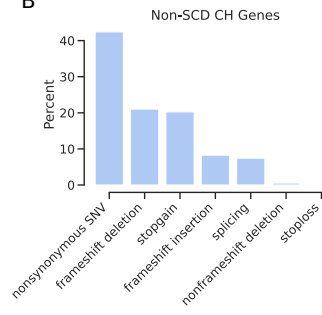

C

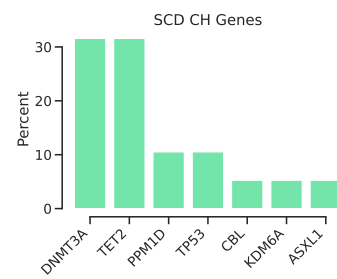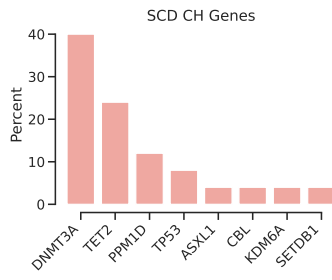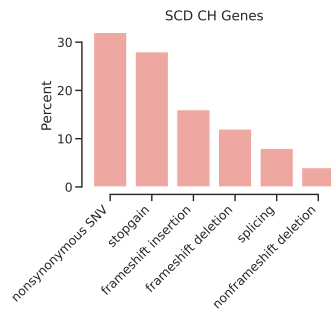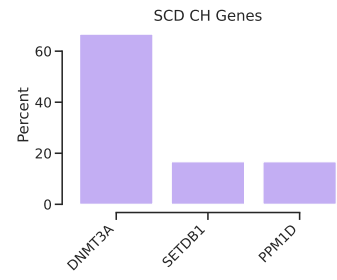

# Supplemental Figure 6

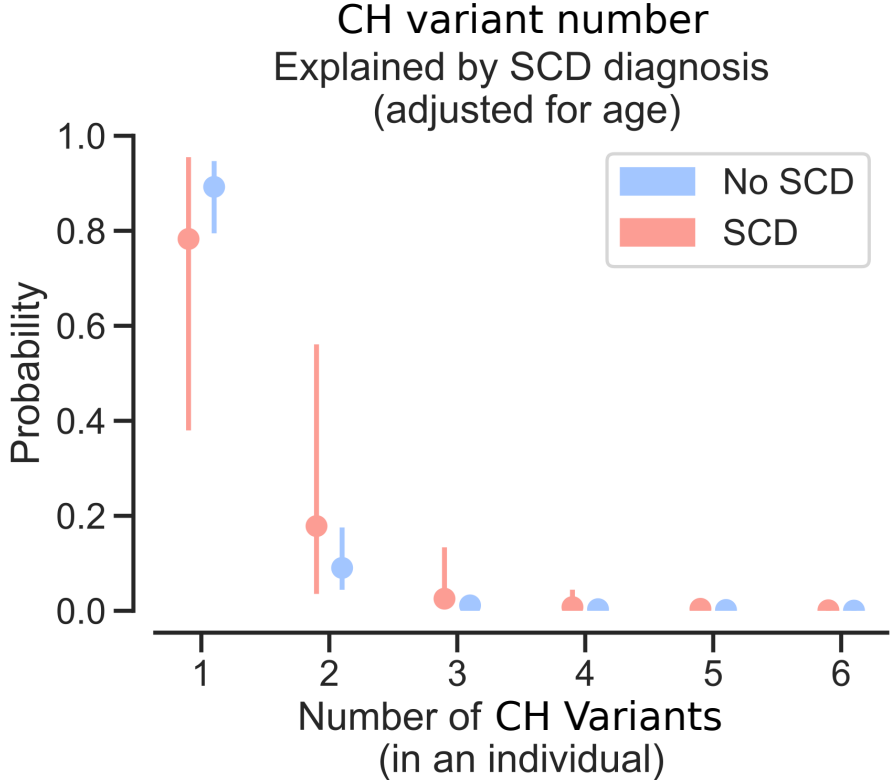

## Figure Legends

**Supplemental Figure 1.** Cohort age distributions. Age distributions of all individuals combined from each of the TOPMed cohorts used in this study, separated by SCD status into those without SCD (blue) and those with SCD (red).

**Supplemental Figure 2.** A logistic regression model for effect estimates that is adjusted for age, age<sup>2</sup>, sex, study, and the first 10 principal components separated by SCD status into those without SCD (blue) and those with SCD (red).

**Supplemental Figure 3.** CH prevalence when accounting for sickle cell trait. From the group of all control individuals, those individuals who were heterozygous for the sickle cell trait (rs334) SNP are classified as having the sickle cell trait (pink) and those without it are classified as having no sickle cell trait (blue). Even when accounting for the rs334 SNP, there is no significant difference between the two groups.

**Supplemental Figure 4.** CH prevalence in SS SCD subgroup. Homozygous SS SCD genotypes alone do not show elevated prevalence of CH compared with unaffected individuals (OR=1.34, p=0.22).

**Supplemental Figure 5.** (A) Genes ranked by variant load across all individuals separated by SCD status into unaffected (blue) and affected (red). Percent shown on the y-axis refers to the percent of all observed CH related mutations found within each of the genes shown along the x-axis. (B) Type of genetic change ranked by prevalence in all individuals, as a percent of all observed CH related mutations, separated by SCD status into unaffected (blue) and affected (red). (C) Genes ranked by variant load across all individuals, as a percent of all observed CH related mutations, with SCD separated by HU treatment status into untreated (green) and treated (purple).

**Supplemental Figure 6.** CH clone load per individual is unchanged by SCD. Number of variants per individual classified as indicative of CH appear at similar rates in unaffected individuals and individuals with SCD.



## TOPMed Consortium

Details provided here for TOPMed are available at <https://topmed.nhlbi.nih.gov/topmed-banner-authorship>. The TOPMed banner, NHLBI Trans-Omics for Precision Medicine (TOPMed) Consortium, is used to acknowledge individuals who contributed to the overall conduct of TOPMed but do not otherwise meet criteria for by-line authorship for a given manuscript:

| <b>Name</b>               | <b>Institution(s)</b>                                           |
|---------------------------|-----------------------------------------------------------------|
| Abe, Namiko               | New York Genome Center                                          |
| Abecasis, Gonçalo         | University of Michigan                                          |
| Aguet, Francois           | Broad Institute                                                 |
| Albert, Christine         | Cedars Sinai                                                    |
| Almasy, Laura             | Children's Hospital of Philadelphia, University of Pennsylvania |
| Alonso, Alvaro            | Emory University                                                |
| Ament, Seth               | University of Maryland                                          |
| Anderson, Peter           | University of Washington                                        |
| Anugu, Pramod             | University of Mississippi                                       |
| Applebaum-Bowden, Deborah | National Institutes of Health                                   |
| Ardlie, Kristin           | Broad Institute                                                 |
| Arking, Dan               | Johns Hopkins University                                        |
| Arnett, Donna K           | University of Kentucky                                          |
| Ashley-Koch, Allison      | Duke University                                                 |
| Aslibekyan, Stella        | University of Alabama                                           |
| Assimes, Tim              | Stanford University                                             |
| Auer, Paul                | Medical College of Wisconsin                                    |
| Avramopoulos, Dimitrios   | Johns Hopkins University                                        |
| Ayas, Najib               | Providence Health Care                                          |
| Balasubramanian, Adithya  | Baylor College of Medicine Human Genome Sequencing Center       |
| Barnard, John             | Cleveland Clinic                                                |
| Barnes, Kathleen          | Tempus, University of Colorado Anschutz Medical Campus          |
| Barr, R. Graham           | Columbia University                                             |
| Barron-Casella, Emily     | Johns Hopkins University                                        |
| Barwick, Lucas            | The Emmes Corporation                                           |
| Beaty, Terri              | Johns Hopkins University                                        |
| Beck, Gerald              | Cleveland Clinic                                                |
| Becker, Diane             | Johns Hopkins University                                        |

|                      |                                                                          |
|----------------------|--------------------------------------------------------------------------|
| Becker, Lewis        | Johns Hopkins University                                                 |
| Beer, Rebecca        | National Heart, Lung, and Blood Institute, National Institutes of Health |
| Beitelshees, Amber   | University of Maryland                                                   |
| Benjamin, Emelia     | Boston University, Massachusetts General Hospital                        |
| Benos, Takis         | University of Pittsburgh                                                 |
| Bezerra, Marcos      | Fundação de Hematologia e Hemoterapia de Pernambuco - Hemope             |
| Bielak, Larry        | University of Michigan                                                   |
| Bis, Joshua          | University of Washington                                                 |
| Blackwell, Thomas    | University of Michigan                                                   |
| Blangero, John       | University of Texas Rio Grande Valley School of Medicine                 |
| Boerwinkle, Eric     | University of Texas Health at Houston                                    |
| Bowden, Donald W.    | Wake Forest Baptist Health                                               |
| Bowler, Russell      | National Jewish Health                                                   |
| Brody, Jennifer      | University of Washington                                                 |
| Broeckel, Ulrich     | Medical College of Wisconsin                                             |
| Broome, Jai          | University of Washington                                                 |
| Brown, Deborah       | University of Texas Health at Houston                                    |
| Bunting, Karen       | New York Genome Center                                                   |
| Burchard, Esteban    | University of California, San Francisco                                  |
| Bustamante, Carlos   | Stanford University                                                      |
| Buth, Erin           | University of Washington                                                 |
| Cade, Brian          | Brigham & Women's Hospital                                               |
| Cardwell, Jonathan   | University of Colorado at Denver                                         |
| Carey, Vincent       | Brigham & Women's Hospital                                               |
| Carrier, Julie       | University of Montreal                                                   |
| Carson, April        | University of Mississippi                                                |
| Carty, Cara          | Washington State University                                              |
| Casaburi, Richard    | University of California, Los Angeles                                    |
| Casas Romero, Juan P | Brigham & Women's Hospital                                               |
| Casella, James       | Johns Hopkins University                                                 |
| Castaldi, Peter      | Brigham & Women's Hospital                                               |
| Chaffin, Mark        | Broad Institute                                                          |
| Chang, Christy       | University of Maryland                                                   |
| Chang, Yi-Cheng      | National Taiwan University                                               |
| Chasman, Daniel      | Brigham & Women's Hospital                                               |
| Chavan, Sameer       | University of Colorado at Denver                                         |
| Chen, Bo-Juen        | New York Genome Center                                                   |
| Chen, Wei-Min        | University of Virginia                                                   |

|                      |                                                           |
|----------------------|-----------------------------------------------------------|
| Chen, Yii-Der Ida    | Lundquist Institute                                       |
| Cho, Michael         | Brigham & Women's Hospital                                |
| Choi, Seung Hoan     | Broad Institute                                           |
| Chuang, Lee-Ming     | National Taiwan University                                |
| Chung, Mina          | Cleveland Clinic                                          |
| Chung, Ren-Hua       | National Health Research Institute Taiwan                 |
| Clish, Clary         | Broad Institute                                           |
| Comhair, Suzy        | Cleveland Clinic                                          |
| Conomos, Matthew     | University of Washington                                  |
| Cornell, Elaine      | University of Vermont                                     |
| Correa, Adolfo       | University of Mississippi                                 |
| Crandall, Carolyn    | University of California, Los Angeles                     |
| Crapo, James         | National Jewish Health                                    |
| Cupples, L. Adrienne | Boston University                                         |
| Curran, Joanne       | University of Texas Rio Grande Valley School of Medicine  |
| Curtis, Jeffrey      | University of Michigan                                    |
| Custer, Brian        | Vitalant Research Institute                               |
| Damcott, Coleen      | University of Maryland                                    |
| Darbar, Dawood       | University of Illinois at Chicago                         |
| David, Sean          | University of Chicago                                     |
| Davis, Colleen       | University of Washington                                  |
| Daya, Michelle       | University of Colorado at Denver                          |
| de Andrade, Mariza   | Mayo Clinic                                               |
| de las Fuentes, Lisa | Washington University in St Louis                         |
| de Vries, Paul       | University of Texas Health at Houston                     |
| DeBaun, Michael      | Vanderbilt University                                     |
| Deka, Ranjan         | University of Cincinnati                                  |
| DeMeo, Dawn          | Brigham & Women's Hospital                                |
| Devine, Scott        | University of Maryland                                    |
| Dinh, Huyen          | Baylor College of Medicine Human Genome Sequencing Center |
| Doddapaneni, Harsha  | Baylor College of Medicine Human Genome Sequencing Center |
| Duan, Qing           | University of North Carolina                              |
| Dugan-Perez, Shannon | Baylor College of Medicine Human Genome Sequencing Center |
| Duggirala, Ravi      | University of Texas Rio Grande Valley School of Medicine  |
| Durda, Jon Peter     | University of Vermont                                     |
| Dutcher, Susan K.    | Washington University in St Louis                         |
| Eaton, Charles       | Brown University                                          |

|                         |                                                                          |
|-------------------------|--------------------------------------------------------------------------|
| Ekunwe, Lynette         | University of Mississippi                                                |
| El Boueiz, Adel         | Harvard University                                                       |
| Ellinor, Patrick        | Massachusetts General Hospital                                           |
| Emery, Leslie           | University of Washington                                                 |
| Erzurum, Serpil         | Cleveland Clinic                                                         |
| Farber, Charles         | University of Virginia                                                   |
| Farek, Jesse            | Baylor College of Medicine Human Genome Sequencing Center                |
| Fingerlin, Tasha        | National Jewish Health                                                   |
| Flickinger, Matthew     | University of Michigan                                                   |
| Fornage, Myriam         | University of Texas Health at Houston                                    |
| Franceschini, Nora      | University of North Carolina                                             |
| Frazar, Chris           | University of Washington                                                 |
| Fu, Mao                 | University of Maryland                                                   |
| Fullerton, Stephanie M. | University of Washington                                                 |
| Fulton, Lucinda         | Washington University in St Louis                                        |
| Gabriel, Stacey         | Broad Institute                                                          |
| Gan, Weiniu             | National Heart, Lung, and Blood Institute, National Institutes of Health |
| Gao, Shanshan           | University of Colorado at Denver                                         |
| Gao, Yan                | University of Mississippi                                                |
| Gass, Margery           | Fred Hutchinson Cancer Research Center                                   |
| Geiger, Heather         | New York Genome Center                                                   |
| Gelb, Bruce             | Icahn School of Medicine at Mount Sinai                                  |
| Geraci, Mark            | University of Pittsburgh                                                 |
| Germer, Soren           | New York Genome Center                                                   |
| Gerszten, Robert        | Beth Israel Deaconess Medical Center                                     |
| Ghosh, Auyon            | Brigham & Women's Hospital                                               |
| Gibbs, Richard          | Baylor College of Medicine Human Genome Sequencing Center                |
| Gignoux, Chris          | Stanford University                                                      |
| Gladwin, Mark           | University of Pittsburgh                                                 |
| Glahn, David            | Boston Children's Hospital, Harvard Medical School                       |
| Gogarten, Stephanie     | University of Washington                                                 |
| Gong, Da-Wei            | University of Maryland                                                   |
| Goring, Harald          | University of Texas Rio Grande Valley School of Medicine                 |
| Graw, Sharon            | University of Colorado Anschutz Medical Campus                           |
| Gray, Kathryn J.        | Mass General Brigham                                                     |
| Grine, Daniel           | University of Colorado at Denver                                         |
| Gross, Colin            | University of Michigan                                                   |

|                        |                                                                          |
|------------------------|--------------------------------------------------------------------------|
| Gu, C. Charles         | Washington University in St Louis                                        |
| Guan, Yue              | University of Maryland                                                   |
| Guo, Xiuqing           | Lundquist Institute                                                      |
| Gupta, Namrata         | Broad Institute                                                          |
| Haas, David M.         | Indiana University                                                       |
| Haessler, Jeff         | Fred Hutchinson Cancer Research Center                                   |
| Hall, Michael          | University of Mississippi                                                |
| Han, Yi                | Baylor College of Medicine Human Genome Sequencing Center                |
| Hanly, Patrick         | University of Calgary                                                    |
| Harris, Daniel         | University of Maryland                                                   |
| Hawley, Nicola L.      | Yale University                                                          |
| He, Jiang              | Tulane University                                                        |
| Heavner, Ben           | University of Washington                                                 |
| Heckbert, Susan        | University of Washington                                                 |
| Hernandez, Ryan        | University of California, San Francisco                                  |
| Herrington, David      | Wake Forest Baptist Health                                               |
| Hersh, Craig           | Brigham & Women's Hospital                                               |
| Hidalgo, Bertha        | University of Alabama                                                    |
| Hixson, James          | University of Texas Health at Houston                                    |
| Hobbs, Brian           | Brigham & Women's Hospital                                               |
| Hokanson, John         | University of Colorado at Denver                                         |
| Hong, Elliott          | University of Maryland                                                   |
| Hoth, Karin            | University of Iowa                                                       |
| Hsiung, Chao (Agnes)   | National Health Research Institute Taiwan                                |
| Hu, Jianhong           | Baylor College of Medicine Human Genome Sequencing Center                |
| Hung, Yi-Jen           | Tri-Service General Hospital National Defense Medical Center             |
| Huston, Haley          | Blood Works Northwest                                                    |
| Hwu, Chii Min          | Taichung Veterans General Hospital Taiwan                                |
| Irvin, Marguerite Ryan | University of Alabama                                                    |
| Jackson, Rebecca       | Oklahoma State University Medical Center                                 |
| Jain, Deepti           | University of Washington                                                 |
| Jaquish, Cashell       | National Heart, Lung, and Blood Institute, National Institutes of Health |
| Johnsen, Jill          | Blood Works Northwest                                                    |
| Johnson, Andrew        | National Heart, Lung, and Blood Institute, National Institutes of Health |
| Johnson, Craig         | University of Washington                                                 |

|                     |                                                                          |
|---------------------|--------------------------------------------------------------------------|
| Johnston, Rich      | Emory University                                                         |
| Jones, Kimberly     | Johns Hopkins University                                                 |
| Kang, Hyun Min      | University of Michigan                                                   |
| Kaplan, Robert      | Albert Einstein College of Medicine                                      |
| Kardia, Sharon      | University of Michigan                                                   |
| Kelly, Shannon      | University of California, San Francisco                                  |
| Kenny, Eimear       | Icahn School of Medicine at Mount Sinai                                  |
| Kessler, Michael    | University of Maryland                                                   |
| Khan, Alyna         | University of Washington                                                 |
| Khan, Ziad          | Baylor College of Medicine Human Genome Sequencing Center                |
| Kim, Wonji          | Harvard University                                                       |
| Kimoff, John        | McGill University                                                        |
| Kinney, Greg        | University of Colorado at Denver                                         |
| Konkle, Barbara     | Blood Works Northwest                                                    |
| Kooperberg, Charles | Fred Hutchinson Cancer Research Center                                   |
| Kramer, Holly       | Loyola University                                                        |
| Lange, Christoph    | Harvard School of Public Health                                          |
| Lange, Ethan        | University of Colorado at Denver                                         |
| Lange, Leslie       | University of Colorado at Denver                                         |
| Laurie, Cathy       | University of Washington                                                 |
| Laurie, Cecelia     | University of Washington                                                 |
| LeBoff, Meryl       | Brigham & Women's Hospital                                               |
| Lee, Jiwon          | Brigham & Women's Hospital                                               |
| Lee, Sandra         | Baylor College of Medicine Human Genome Sequencing Center                |
| Lee, Wen-Jane       | Taichung Veterans General Hospital Taiwan                                |
| LeFaive, Jonathon   | University of Michigan                                                   |
| Levine, David       | University of Washington                                                 |
| Levy, Dan           | National Heart, Lung, and Blood Institute, National Institutes of Health |
| Lewis, Joshua       | University of Maryland                                                   |
| Li, Xiaohui         | Lundquist Institute                                                      |
| Li, Yun             | University of North Carolina                                             |
| Lin, Henry          | Lundquist Institute                                                      |
| Lin, Honghuang      | Boston University                                                        |
| Lin, Xihong         | Harvard School of Public Health                                          |
| Liu, Simin          | Brown University                                                         |
| Liu, Yongmei        | Duke University                                                          |
| Liu, Yu             | Stanford University                                                      |

|                      |                                                                                         |
|----------------------|-----------------------------------------------------------------------------------------|
| Loos, Ruth J.F.      | Icahn School of Medicine at Mount Sinai                                                 |
| Lubitz, Steven       | Massachusetts General Hospital                                                          |
| Lunetta, Kathryn     | Boston University                                                                       |
| Luo, James           | National Heart, Lung, and Blood Institute, National Institutes of Health                |
| Magalang, Ulysses    | Ohio State University                                                                   |
| Mahaney, Michael     | University of Texas Rio Grande Valley School of Medicine                                |
| Make, Barry          | Johns Hopkins University                                                                |
| Manichaikul, Ani     | University of Virginia                                                                  |
| Manning, Alisa       | Broad Institute, Harvard University, Massachusetts General Hospital                     |
| Manson, JoAnn        | Brigham & Women's Hospital                                                              |
| Martin, Lisa         | George Washington University                                                            |
| Marton, Melissa      | New York Genome Center                                                                  |
| Mathai, Susan        | University of Colorado at Denver                                                        |
| Mathias, Rasika      | Johns Hopkins University                                                                |
| May, Susanne         | University of Washington                                                                |
| McArdle, Patrick     | University of Maryland                                                                  |
| McDonald, Merry-Lynn | University of Alabama                                                                   |
| McFarland, Sean      | Harvard University                                                                      |
| McGarvey, Stephen    | Brown University                                                                        |
| McGoldrick, Daniel   | University of Washington                                                                |
| McHugh, Caitlin      | University of Washington                                                                |
| McNeil, Becky        | RTI International                                                                       |
| Mei, Hao             | University of Mississippi                                                               |
| Meigs, James         | Massachusetts General Hospital                                                          |
| Menon, Vipin         | Baylor College of Medicine Human Genome Sequencing Center                               |
| Mestroni, Luisa      | University of Colorado Anschutz Medical Campus                                          |
| Metcalf, Ginger      | Baylor College of Medicine Human Genome Sequencing Center                               |
| Meyers, Deborah A    | University of Arizona                                                                   |
| Mignot, Emmanuel     | Stanford University                                                                     |
| Mikulla, Julie       | National Heart, Lung, and Blood Institute, National Institutes of Health                |
| Min, Nancy           | University of Mississippi                                                               |
| Minear, Mollie       | National Institute of Child Health and Human Development, National Institutes of Health |
| Minster, Ryan L      | University of Pittsburgh                                                                |
| Mitchell, Braxton D. | University of Maryland                                                                  |

|                      |                                                                          |
|----------------------|--------------------------------------------------------------------------|
| Moll, Matt           | Brigham & Women's Hospital                                               |
| Momin, Zeineen       | Baylor College of Medicine Human Genome Sequencing Center                |
| Montasser, May E.    | University of Maryland                                                   |
| Montgomery, Courtney | Oklahoma Medical Research Foundation                                     |
| Muzny, Donna         | Baylor College of Medicine Human Genome Sequencing Center                |
| Mychaleckyj, Josyf C | University of Virginia                                                   |
| Nadkarni, Girish     | Icahn School of Medicine at Mount Sinai                                  |
| Naik, Rakhi          | Johns Hopkins University                                                 |
| Naseri, Take         | Ministry of Health, Government of Samoa                                  |
| Natarajan, Pradeep   | Broad Institute                                                          |
| Nekhai, Sergei       | Howard University                                                        |
| Nelson, Sarah C.     | University of Washington                                                 |
| Neltner, Bonnie      | University of Colorado at Denver                                         |
| Nessner, Caitlin     | Baylor College of Medicine Human Genome Sequencing Center                |
| Nickerson, Deborah   | University of Washington                                                 |
| Nkechinyere, Osuji   | Baylor College of Medicine Human Genome Sequencing Center                |
| North, Kari          | University of North Carolina                                             |
| O'Connell, Jeff      | University of Maryland                                                   |
| O'Connor, Tim        | University of Maryland                                                   |
| Ochs-Balcom, Heather | University at Buffalo                                                    |
| Okwuonu, Geoffrey    | Baylor College of Medicine Human Genome Sequencing Center                |
| Pack, Allan          | University of Pennsylvania                                               |
| Paik, David T.       | Stanford University                                                      |
| Palmer, Nicholette   | Wake Forest Baptist Health                                               |
| Pankow, James        | University of Minnesota                                                  |
| Papanicolaou, George | National Heart, Lung, and Blood Institute, National Institutes of Health |
| Parker, Cora         | RTI International                                                        |
| Peloso, Gina         | Boston University                                                        |
| Peralta, Juan Manuel | University of Texas Rio Grande Valley School of Medicine                 |
| Perez, Marco         | Stanford University                                                      |
| Perry, James         | University of Maryland                                                   |
| Peters, Ulrike       | Fred Hutchinson Cancer Research Center                                   |
| Peyser, Patricia     | University of Michigan                                                   |
| Phillips, Lawrence S | Emory University                                                         |



|                                 |                                                                             |
|---------------------------------|-----------------------------------------------------------------------------|
| Pleiness, Jacob                 | University of Michigan                                                      |
| Pollin, Toni                    | University of Maryland                                                      |
| Post, Wendy                     | Johns Hopkins University                                                    |
| Powers Becker, Julia            | University of Colorado at Denver                                            |
| Preethi Boorgula,<br>Meher      | University of Colorado at Denver                                            |
| Preuss, Michael                 | Icahn School of Medicine at Mount Sinai                                     |
| Psaty, Bruce                    | University of Washington                                                    |
| Qasba, Pankaj                   | National Heart, Lung, and Blood Institute, National Institutes<br>of Health |
| Qiao, Dandi                     | Brigham & Women's Hospital                                                  |
| Qin, Zhaohui                    | Emory University                                                            |
| Rafaels, Nicholas               | University of Colorado at Denver                                            |
| Raffield, Laura                 | University of North Carolina                                                |
| Rajendran, Mahitha              | Baylor College of Medicine Human Genome Sequencing<br>Center                |
| Ramachandran, Vasana<br>S.      | Boston University                                                           |
| Rao, D.C.                       | Washington University in St Louis                                           |
| Rasmussen-Torvik,<br>Laura      | Northwestern University                                                     |
| Ratan, Aakrosh                  | University of Virginia                                                      |
| Redline, Susan                  | Brigham & Women's Hospital                                                  |
| Reed, Robert                    | University of Maryland                                                      |
| Reeves, Catherine               | New York Genome Center                                                      |
| Regan, Elizabeth                | National Jewish Health                                                      |
| Reiner, Alex                    | Fred Hutchinson Cancer Research Center, University of<br>Washington         |
| Reupena, Muagututi'a<br>Sefuiva | Lutia I Puava Ae Mapu I Fagalele                                            |
| Rice, Ken                       | University of Washington                                                    |
| Rich, Stephen                   | University of Virginia                                                      |
| Robillard, Rebecca              | University of Ottawa                                                        |
| Robine, Nicolas                 | New York Genome Center                                                      |
| Roden, Dan                      | Vanderbilt University                                                       |
| Roselli, Carolina               | Broad Institute                                                             |
| Rotter, Jerome                  | Lundquist Institute                                                         |
| Ruczinski, Ingo                 | Johns Hopkins University                                                    |
| Runnels, Alexi                  | New York Genome Center                                                      |
| Russell, Pamela                 | University of Colorado at Denver                                            |
| Ruska, Sarah                    | Blood Works Northwest                                                       |

|                        |                                                           |
|------------------------|-----------------------------------------------------------|
| Ryan, Kathleen         | University of Maryland                                    |
| Sabino, Ester Cerdeira | Universidade de Sao Paulo                                 |
| Saleheen, Danish       | Columbia University                                       |
| Salimi, Shabnam        | University of Maryland                                    |
| Salvi, Sejal           | Baylor College of Medicine Human Genome Sequencing Center |
| Salzberg, Steven       | Johns Hopkins University                                  |
| Sadow, Kevin           | Lundquist Institute                                       |
| Sankaran, Vijay G.     | Harvard University                                        |
| Santibanez, Jireh      | Baylor College of Medicine Human Genome Sequencing Center |
| Schwander, Karen       | Washington University in St Louis                         |
| Schwartz, David        | University of Colorado at Denver                          |
| Sciurba, Frank         | University of Pittsburgh                                  |
| Seidman, Christine     | Harvard Medical School                                    |
| Seidman, Jonathan      | Harvard Medical School                                    |
| Sériès, Frédéric       | Université Laval                                          |
| Sheehan, Vivien        | Emory University                                          |
| Sherman, Stephanie L.  | Emory University                                          |
| Shetty, Amol           | University of Maryland                                    |
| Shetty, Aniket         | University of Colorado at Denver                          |
| Sheu, Wayne Hui-Heng   | Taichung Veterans General Hospital Taiwan                 |
| Shoemaker, M. Benjamin | Vanderbilt University                                     |
| Silver, Brian          | UMass Memorial Medical Center                             |
| Silverman, Edwin       | Brigham & Women's Hospital                                |
| Skomro, Robert         | University of Saskatchewan                                |
| Smith, Albert Vernon   | University of Michigan                                    |
| Smith, Jennifer        | University of Michigan                                    |
| Smith, Josh            | University of Washington                                  |
| Smith, Nicholas        | University of Washington                                  |
| Smith, Tanja           | New York Genome Center                                    |
| Smoller, Sylvia        | Albert Einstein College of Medicine                       |
| Snively, Beverly       | Wake Forest Baptist Health                                |
| Snyder, Michael        | Stanford University                                       |
| Sofer, Tamar           | Brigham & Women's Hospital                                |
| Sotoodehnia, Nona      | University of Washington                                  |
| Stilp, Adrienne M.     | University of Washington                                  |
| Storm, Garrett         | University of Colorado at Denver                          |
| Streeten, Elizabeth    | University of Maryland                                    |

|                      |                                                           |
|----------------------|-----------------------------------------------------------|
| Su, Jessica Lasky    | Brigham & Women's Hospital                                |
| Sung, Yun Ju         | Washington University in St Louis                         |
| Sylvia, Jody         | Brigham & Women's Hospital                                |
| Szpiro, Adam         | University of Washington                                  |
| Taliun, Daniel       | University of Michigan                                    |
| Tang, Hua            | Stanford University                                       |
| Taub, Margaret       | Johns Hopkins University                                  |
| Taylor, Kent D.      | Lundquist Institute                                       |
| Taylor, Matthew      | University of Colorado Anschutz Medical Campus            |
| Taylor, Simeon       | University of Maryland                                    |
| Telen, Marilyn       | Duke University                                           |
| Thornton, Timothy A. | University of Washington                                  |
| Threlkeld, Machiko   | University of Washington                                  |
| Tinker, Lesley       | Fred Hutchinson Cancer Research Center                    |
| Tirschwell, David    | University of Washington                                  |
| Tishkoff, Sarah      | University of Pennsylvania                                |
| Tiwari, Hemant       | University of Alabama                                     |
| Tong, Catherine      | University of Washington                                  |
| Tracy, Russell       | University of Vermont                                     |
| Tsai, Michael        | University of Minnesota                                   |
| Vaidya, Dhananjay    | Johns Hopkins University                                  |
| Van Den Berg, David  | University of Southern California                         |
| VandeHaar, Peter     | University of Michigan                                    |
| Vrieze, Scott        | University of Minnesota                                   |
| Walker, Tarik        | University of Colorado at Denver                          |
| Wallace, Robert      | University of Iowa                                        |
| Walts, Avram         | University of Colorado at Denver                          |
| Wang, Fei Fei        | University of Washington                                  |
| Wang, Heming         | Brigham & Women's Hospital, Mass General Brigham          |
| Wang, Jiongming      | University of Michigan                                    |
| Watson, Karol        | University of California, Los Angeles                     |
| Watt, Jennifer       | Baylor College of Medicine Human Genome Sequencing Center |
| Weeks, Daniel E.     | University of Pittsburgh                                  |
| Weinstock, Joshua    | University of Michigan                                    |
| Weir, Bruce          | University of Washington                                  |
| Weiss, Scott T       | Brigham & Women's Hospital                                |
| Weng, Lu-Chen        | Massachusetts General Hospital                            |
| Wessel, Jennifer     | Indiana University                                        |
| Willer, Cristen      | University of Michigan                                    |

|                            |                                      |
|----------------------------|--------------------------------------|
| Williams, Kayleen          | University of Washington             |
| Williams, L. Keoki         | Henry Ford Health System             |
| Wilson, Carla              | Brigham & Women's Hospital           |
| Wilson, James              | Beth Israel Deaconess Medical Center |
| Winterkorn, Lara           | New York Genome Center               |
| Wong, Quenna               | University of Washington             |
| Wu, Joseph                 | Stanford University                  |
| Xu, Huichun                | University of Maryland               |
| Yanek, Lisa                | Johns Hopkins University             |
| Yang, Ivana                | University of Colorado at Denver     |
| Yu, Ketian                 | University of Michigan               |
| Zekavat, Seyedeh<br>Maryam | Broad Institute                      |
| Zhang, Yingze              | University of Pittsburgh             |
| Zhao, Snow Xueyan          | National Jewish Health               |
| Zhao, Wei                  | University of Michigan               |
| Zhu, Xiaofeng              | Case Western Reserve University      |
| Zody, Michael              | New York Genome Center               |
| Zoellner, Sebastian        | University of Michigan               |

## Walk-PHaSST

We also thank the Walk-PHaSST clinical site team: Jane Little and Verlene Davis (Albert Einstein College of Medicine); Robyn Barst, Erika Rosenzweig, Margaret Lee, and Daniela Brady (Columbia University); Claudia Morris, Ward Hagar, Lisa Lavrisha, Howard Rosenfeld, and Elliott Vichinsky (UCSF Benioff Children's Hospital Oakland); Regina McCollum (Children's Hospital of Pittsburgh of UPMC); Sally Davies, Gaia Mahalingam, Sharon Meehan, Ofelia Lebanto, and Ines Cabrita (Hammersmith Hospital, London); Victor Gordeuk, Oswaldo Castro, Onyinye Onyekwere, Vandana Sachdev, Alvin Thomas, Gladys Onojobi, Sharmin Diaz, Margaret Fadojutimi-Akinsiku, and Randa Aladdin (Howard University); Reda Girgis, Sophie Lanzkron, and Durrant Barasa (Johns Hopkins University); Mark Gladwin, Greg Kato, James Taylor, Wynona Coles, Catherine Seamon, Mary Hall, Amy Chi, Cynthia Brenneman, Wen Li, and Erin Smith (NHLBI); Kathryn Hassell, David Badesch, Deb McCollister and Julie McAfee (University of Colorado); Dean Schraufnagel, Robert Molokie, George Kondos, Patricia Cole-Saffold, and Lani Krauz (University of Illinois at Chicago); and Simon Gibbs (National Heart & Lung Institute, Imperial College London).
