# Supplementary material for: Clonal hematopoiesis in sickle cell disease
Source: JCI journal article supplement (doi:10.1172/jci156060), 2022-01-06
Supplement: sd2 [file 2]

## ICMJE DISCLOSURE FORM

**Date:** 12/2/2021

**Your Name:** L. A. Liggett

**Manuscript Title:** Clonal Hematopoiesis in Sickle Cell Disease

**Manuscript Number (if known):** 156060-JCI-CMED-RV-2

In the interest of transparency, we ask you to disclose all relationships/activities/interests listed below that are related to the content of your manuscript. "Related" means any relation with for-profit or not-for-profit third parties whose interests may be affected by the content of the manuscript. Disclosure represents a commitment to transparency and does not necessarily indicate a bias. If you are in doubt about whether to list a relationship/activity/interest, it is preferable that you do so.

The author's relationships/activities/interests should be defined broadly. For example, if your manuscript pertains to the epidemiology of hypertension, you should declare all relationships with manufacturers of antihypertensive medication, even if that medication is not mentioned in the manuscript.

In item #1 below, report all support for the work reported in this manuscript without time limit. For all other items, the time frame for disclosure is the past 36 months.

|                                                           |                                                                                                                                                                                | Name all entities with whom you have this relationship or indicate none (add rows as needed)                                                                                                                                                                                                                                                                                                                     | Specifications/Comments (e.g., if payments were made to you or to your institution) |
|-----------------------------------------------------------|--------------------------------------------------------------------------------------------------------------------------------------------------------------------------------|------------------------------------------------------------------------------------------------------------------------------------------------------------------------------------------------------------------------------------------------------------------------------------------------------------------------------------------------------------------------------------------------------------------|-------------------------------------------------------------------------------------|
| <b>Time frame: Since the initial planning of the work</b> |                                                                                                                                                                                |                                                                                                                                                                                                                                                                                                                                                                                                                  |                                                                                     |
| <b>1</b>                                                  | All support for the present manuscript (e.g., funding, provision of study materials, medical writing, article processing charges, etc.)<br><b>No time limit for this item.</b> | <div style="display: flex; justify-content: space-between; align-items: flex-start;"> <div style="width: 60%;"> <input checked="" type="checkbox"/> <b>None</b> </div> <div style="width: 35%; border: 1px solid black; height: 100px; position: relative;"> <div style="position: absolute; top: 5px; right: 5px; font-size: 0.8em; color: #ccc;">Click the tab key to add additional rows.</div> </div> </div> |                                                                                     |
| <b>Time frame: past 36 months</b>                         |                                                                                                                                                                                |                                                                                                                                                                                                                                                                                                                                                                                                                  |                                                                                     |
| <b>2</b>                                                  | Grants or contracts from any entity (if not indicated in item #1 above).                                                                                                       | <div style="display: flex; justify-content: space-between; align-items: flex-start;"> <div style="width: 60%;"> <input checked="" type="checkbox"/> <b>None</b> </div> <div style="width: 35%; border: 1px solid black; height: 100px; position: relative;"> <div style="position: absolute; top: 5px; right: 5px; font-size: 0.8em; color: #ccc;">Click the tab key to add additional rows.</div> </div> </div> |                                                                                     |
| <b>3</b>                                                  | Royalties or licenses                                                                                                                                                          | <div style="display: flex; justify-content: space-between; align-items: flex-start;"> <div style="width: 60%;"> <input checked="" type="checkbox"/> <b>None</b> </div> <div style="width: 35%; border: 1px solid black; height: 100px; position: relative;"> <div style="position: absolute; top: 5px; right: 5px; font-size: 0.8em; color: #ccc;">Click the tab key to add additional rows.</div> </div> </div> |                                                                                     |

|    |                                                                                                              |                                                                                                                                                                                                                             |  |  |  |  |  |  |  |  |
|----|--------------------------------------------------------------------------------------------------------------|-----------------------------------------------------------------------------------------------------------------------------------------------------------------------------------------------------------------------------|--|--|--|--|--|--|--|--|
| 4  | Consulting fees                                                                                              | <input checked="" type="checkbox"/> <b>None</b><br><table border="1" data-bbox="370 205 1505 342"> <tr><td></td><td></td></tr> <tr><td></td><td></td></tr> <tr><td></td><td></td></tr> <tr><td></td><td></td></tr> </table> |  |  |  |  |  |  |  |  |
|    |                                                                                                              |                                                                                                                                                                                                                             |  |  |  |  |  |  |  |  |
|    |                                                                                                              |                                                                                                                                                                                                                             |  |  |  |  |  |  |  |  |
|    |                                                                                                              |                                                                                                                                                                                                                             |  |  |  |  |  |  |  |  |
|    |                                                                                                              |                                                                                                                                                                                                                             |  |  |  |  |  |  |  |  |
| 5  | Payment or honoraria for lectures, presentations, speakers bureaus, manuscript writing or educational events | <input checked="" type="checkbox"/> <b>None</b><br><table border="1" data-bbox="370 493 1505 596"> <tr><td></td><td></td></tr> <tr><td></td><td></td></tr> <tr><td></td><td></td></tr> </table>                             |  |  |  |  |  |  |  |  |
|    |                                                                                                              |                                                                                                                                                                                                                             |  |  |  |  |  |  |  |  |
|    |                                                                                                              |                                                                                                                                                                                                                             |  |  |  |  |  |  |  |  |
|    |                                                                                                              |                                                                                                                                                                                                                             |  |  |  |  |  |  |  |  |
| 6  | Payment for expert testimony                                                                                 | <input checked="" type="checkbox"/> <b>None</b><br><table border="1" data-bbox="370 831 1505 934"> <tr><td></td><td></td></tr> <tr><td></td><td></td></tr> <tr><td></td><td></td></tr> </table>                             |  |  |  |  |  |  |  |  |
|    |                                                                                                              |                                                                                                                                                                                                                             |  |  |  |  |  |  |  |  |
|    |                                                                                                              |                                                                                                                                                                                                                             |  |  |  |  |  |  |  |  |
|    |                                                                                                              |                                                                                                                                                                                                                             |  |  |  |  |  |  |  |  |
| 7  | Support for attending meetings and/or travel                                                                 | <input checked="" type="checkbox"/> <b>None</b><br><table border="1" data-bbox="370 1087 1505 1190"> <tr><td></td><td></td></tr> <tr><td></td><td></td></tr> <tr><td></td><td></td></tr> </table>                           |  |  |  |  |  |  |  |  |
|    |                                                                                                              |                                                                                                                                                                                                                             |  |  |  |  |  |  |  |  |
|    |                                                                                                              |                                                                                                                                                                                                                             |  |  |  |  |  |  |  |  |
|    |                                                                                                              |                                                                                                                                                                                                                             |  |  |  |  |  |  |  |  |
| 8  | Patents planned, issued or pending                                                                           | <input checked="" type="checkbox"/> <b>None</b><br><table border="1" data-bbox="370 1344 1505 1446"> <tr><td></td><td></td></tr> <tr><td></td><td></td></tr> <tr><td></td><td></td></tr> </table>                           |  |  |  |  |  |  |  |  |
|    |                                                                                                              |                                                                                                                                                                                                                             |  |  |  |  |  |  |  |  |
|    |                                                                                                              |                                                                                                                                                                                                                             |  |  |  |  |  |  |  |  |
|    |                                                                                                              |                                                                                                                                                                                                                             |  |  |  |  |  |  |  |  |
| 9  | Participation on a Data Safety Monitoring Board or Advisory Board                                            | <input checked="" type="checkbox"/> <b>None</b><br><table border="1" data-bbox="370 1600 1505 1703"> <tr><td></td><td></td></tr> <tr><td></td><td></td></tr> <tr><td></td><td></td></tr> </table>                           |  |  |  |  |  |  |  |  |
|    |                                                                                                              |                                                                                                                                                                                                                             |  |  |  |  |  |  |  |  |
|    |                                                                                                              |                                                                                                                                                                                                                             |  |  |  |  |  |  |  |  |
|    |                                                                                                              |                                                                                                                                                                                                                             |  |  |  |  |  |  |  |  |
| 10 | Leadership or fiduciary role in other board, society, committee or                                           | <input checked="" type="checkbox"/> <b>None</b><br><table border="1" data-bbox="370 1856 1505 1959"> <tr><td></td><td></td></tr> <tr><td></td><td></td></tr> <tr><td></td><td></td></tr> </table>                           |  |  |  |  |  |  |  |  |
|    |                                                                                                              |                                                                                                                                                                                                                             |  |  |  |  |  |  |  |  |
|    |                                                                                                              |                                                                                                                                                                                                                             |  |  |  |  |  |  |  |  |
|    |                                                                                                              |                                                                                                                                                                                                                             |  |  |  |  |  |  |  |  |

|                                                                                                                                                                                                                                                               |                                                                                                 |                                                 |  |
|---------------------------------------------------------------------------------------------------------------------------------------------------------------------------------------------------------------------------------------------------------------|-------------------------------------------------------------------------------------------------|-------------------------------------------------|--|
|                                                                                                                                                                                                                                                               | advocacy group,<br>paid or unpaid                                                               |                                                 |  |
| 11                                                                                                                                                                                                                                                            | Stock or stock<br>options                                                                       | <input checked="" type="checkbox"/> <b>None</b> |  |
|                                                                                                                                                                                                                                                               |                                                                                                 |                                                 |  |
|                                                                                                                                                                                                                                                               |                                                                                                 |                                                 |  |
|                                                                                                                                                                                                                                                               |                                                                                                 |                                                 |  |
| 12                                                                                                                                                                                                                                                            | Receipt of<br>equipment,<br>materials, drugs,<br>medical writing,<br>gifts or other<br>services | <input checked="" type="checkbox"/> <b>None</b> |  |
|                                                                                                                                                                                                                                                               |                                                                                                 |                                                 |  |
|                                                                                                                                                                                                                                                               |                                                                                                 |                                                 |  |
|                                                                                                                                                                                                                                                               |                                                                                                 |                                                 |  |
| 13                                                                                                                                                                                                                                                            | Other financial<br>or non-financial<br>interests                                                | <input checked="" type="checkbox"/> <b>None</b> |  |
|                                                                                                                                                                                                                                                               |                                                                                                 |                                                 |  |
|                                                                                                                                                                                                                                                               |                                                                                                 |                                                 |  |
|                                                                                                                                                                                                                                                               |                                                                                                 |                                                 |  |
| <p><b>Please place an "X" next to the following statement to indicate your agreement:</b></p> <p><input checked="" type="checkbox"/> I certify that I have answered every question and have not altered the wording of any of the questions on this form.</p> |                                                                                                 |                                                 |  |

## ICMJE DISCLOSURE FORM

**Date:** 12/9/2021

**Your Name:** Liam David Cato

**Manuscript Title:** Clonal Hematopoiesis in Sickle Cell Disease

**Manuscript Number (if known):** 156060-JCI-CMED-RV-2

In the interest of transparency, we ask you to disclose all relationships/activities/interests listed below that are related to the content of your manuscript. "Related" means any relation with for-profit or not-for-profit third parties whose interests may be affected by the content of the manuscript. Disclosure represents a commitment to transparency and does not necessarily indicate a bias. If you are in doubt about whether to list a relationship/activity/interest, it is preferable that you do so.

The author's relationships/activities/interests should be defined broadly. For example, if your manuscript pertains to the epidemiology of hypertension, you should declare all relationships with manufacturers of antihypertensive medication, even if that medication is not mentioned in the manuscript.

In item #1 below, report all support for the work reported in this manuscript without time limit. For all other items, the time frame for disclosure is the past 36 months.

|                                                           | Name all entities with whom you have this relationship or indicate none (add rows as needed)                                                                                                                                                                                                                                                                                                    | Specifications/Comments (e.g., if payments were made to you or to your institution) |  |  |  |  |                                           |  |
|-----------------------------------------------------------|-------------------------------------------------------------------------------------------------------------------------------------------------------------------------------------------------------------------------------------------------------------------------------------------------------------------------------------------------------------------------------------------------|-------------------------------------------------------------------------------------|--|--|--|--|-------------------------------------------|--|
| <b>Time frame: Since the initial planning of the work</b> |                                                                                                                                                                                                                                                                                                                                                                                                 |                                                                                     |  |  |  |  |                                           |  |
| <b>1</b>                                                  | <div>All support for the present manuscript (e.g., funding, provision of study materials, medical writing, article processing charges, etc.)<br/><b>No time limit for this item.</b></div> <div><input checked="" type="checkbox"/> <b>None</b></div> <table><tr><td></td><td></td></tr><tr><td></td><td></td></tr><tr><td></td><td>Click the tab key to add additional rows.</td></tr></table> |                                                                                     |  |  |  |  | Click the tab key to add additional rows. |  |
|                                                           |                                                                                                                                                                                                                                                                                                                                                                                                 |                                                                                     |  |  |  |  |                                           |  |
|                                                           |                                                                                                                                                                                                                                                                                                                                                                                                 |                                                                                     |  |  |  |  |                                           |  |
|                                                           | Click the tab key to add additional rows.                                                                                                                                                                                                                                                                                                                                                       |                                                                                     |  |  |  |  |                                           |  |
| <b>Time frame: past 36 months</b>                         |                                                                                                                                                                                                                                                                                                                                                                                                 |                                                                                     |  |  |  |  |                                           |  |
| <b>2</b>                                                  | <div>Grants or contracts from any entity (if not indicated in item #1 above).</div> <div><input checked="" type="checkbox"/> <b>None</b></div> <table><tr><td></td><td></td></tr><tr><td></td><td></td></tr><tr><td></td><td></td></tr></table>                                                                                                                                                 |                                                                                     |  |  |  |  |                                           |  |
|                                                           |                                                                                                                                                                                                                                                                                                                                                                                                 |                                                                                     |  |  |  |  |                                           |  |
|                                                           |                                                                                                                                                                                                                                                                                                                                                                                                 |                                                                                     |  |  |  |  |                                           |  |
|                                                           |                                                                                                                                                                                                                                                                                                                                                                                                 |                                                                                     |  |  |  |  |                                           |  |
| <b>3</b>                                                  | <div>Royalties or licenses</div> <div><input checked="" type="checkbox"/> <b>None</b></div> <table><tr><td></td><td></td></tr><tr><td></td><td></td></tr><tr><td></td><td></td></tr></table>                                                                                                                                                                                                    |                                                                                     |  |  |  |  |                                           |  |
|                                                           |                                                                                                                                                                                                                                                                                                                                                                                                 |                                                                                     |  |  |  |  |                                           |  |
|                                                           |                                                                                                                                                                                                                                                                                                                                                                                                 |                                                                                     |  |  |  |  |                                           |  |
|                                                           |                                                                                                                                                                                                                                                                                                                                                                                                 |                                                                                     |  |  |  |  |                                           |  |

|    |                                                                                                              |                                                                                                                                                                                                                             |  |  |  |  |  |  |  |  |
|----|--------------------------------------------------------------------------------------------------------------|-----------------------------------------------------------------------------------------------------------------------------------------------------------------------------------------------------------------------------|--|--|--|--|--|--|--|--|
| 4  | Consulting fees                                                                                              | <input checked="" type="checkbox"/> <b>None</b><br><table border="1" data-bbox="370 205 1505 342"> <tr><td></td><td></td></tr> <tr><td></td><td></td></tr> <tr><td></td><td></td></tr> <tr><td></td><td></td></tr> </table> |  |  |  |  |  |  |  |  |
|    |                                                                                                              |                                                                                                                                                                                                                             |  |  |  |  |  |  |  |  |
|    |                                                                                                              |                                                                                                                                                                                                                             |  |  |  |  |  |  |  |  |
|    |                                                                                                              |                                                                                                                                                                                                                             |  |  |  |  |  |  |  |  |
|    |                                                                                                              |                                                                                                                                                                                                                             |  |  |  |  |  |  |  |  |
| 5  | Payment or honoraria for lectures, presentations, speakers bureaus, manuscript writing or educational events | <input checked="" type="checkbox"/> <b>None</b><br><table border="1" data-bbox="370 493 1505 596"> <tr><td></td><td></td></tr> <tr><td></td><td></td></tr> <tr><td></td><td></td></tr> </table>                             |  |  |  |  |  |  |  |  |
|    |                                                                                                              |                                                                                                                                                                                                                             |  |  |  |  |  |  |  |  |
|    |                                                                                                              |                                                                                                                                                                                                                             |  |  |  |  |  |  |  |  |
|    |                                                                                                              |                                                                                                                                                                                                                             |  |  |  |  |  |  |  |  |
| 6  | Payment for expert testimony                                                                                 | <input checked="" type="checkbox"/> <b>None</b><br><table border="1" data-bbox="370 831 1505 934"> <tr><td></td><td></td></tr> <tr><td></td><td></td></tr> <tr><td></td><td></td></tr> </table>                             |  |  |  |  |  |  |  |  |
|    |                                                                                                              |                                                                                                                                                                                                                             |  |  |  |  |  |  |  |  |
|    |                                                                                                              |                                                                                                                                                                                                                             |  |  |  |  |  |  |  |  |
|    |                                                                                                              |                                                                                                                                                                                                                             |  |  |  |  |  |  |  |  |
| 7  | Support for attending meetings and/or travel                                                                 | <input checked="" type="checkbox"/> <b>None</b><br><table border="1" data-bbox="370 1087 1505 1190"> <tr><td></td><td></td></tr> <tr><td></td><td></td></tr> <tr><td></td><td></td></tr> </table>                           |  |  |  |  |  |  |  |  |
|    |                                                                                                              |                                                                                                                                                                                                                             |  |  |  |  |  |  |  |  |
|    |                                                                                                              |                                                                                                                                                                                                                             |  |  |  |  |  |  |  |  |
|    |                                                                                                              |                                                                                                                                                                                                                             |  |  |  |  |  |  |  |  |
| 8  | Patents planned, issued or pending                                                                           | <input checked="" type="checkbox"/> <b>None</b><br><table border="1" data-bbox="370 1344 1505 1446"> <tr><td></td><td></td></tr> <tr><td></td><td></td></tr> <tr><td></td><td></td></tr> </table>                           |  |  |  |  |  |  |  |  |
|    |                                                                                                              |                                                                                                                                                                                                                             |  |  |  |  |  |  |  |  |
|    |                                                                                                              |                                                                                                                                                                                                                             |  |  |  |  |  |  |  |  |
|    |                                                                                                              |                                                                                                                                                                                                                             |  |  |  |  |  |  |  |  |
| 9  | Participation on a Data Safety Monitoring Board or Advisory Board                                            | <input checked="" type="checkbox"/> <b>None</b><br><table border="1" data-bbox="370 1600 1505 1703"> <tr><td></td><td></td></tr> <tr><td></td><td></td></tr> <tr><td></td><td></td></tr> </table>                           |  |  |  |  |  |  |  |  |
|    |                                                                                                              |                                                                                                                                                                                                                             |  |  |  |  |  |  |  |  |
|    |                                                                                                              |                                                                                                                                                                                                                             |  |  |  |  |  |  |  |  |
|    |                                                                                                              |                                                                                                                                                                                                                             |  |  |  |  |  |  |  |  |
| 10 | Leadership or fiduciary role in other board, society, committee or                                           | <input checked="" type="checkbox"/> <b>None</b><br><table border="1" data-bbox="370 1856 1505 1959"> <tr><td></td><td></td></tr> <tr><td></td><td></td></tr> <tr><td></td><td></td></tr> </table>                           |  |  |  |  |  |  |  |  |
|    |                                                                                                              |                                                                                                                                                                                                                             |  |  |  |  |  |  |  |  |
|    |                                                                                                              |                                                                                                                                                                                                                             |  |  |  |  |  |  |  |  |
|    |                                                                                                              |                                                                                                                                                                                                                             |  |  |  |  |  |  |  |  |

|                                                                                                                                                                                                                                                               |                                                                                                 |                                                 |  |
|---------------------------------------------------------------------------------------------------------------------------------------------------------------------------------------------------------------------------------------------------------------|-------------------------------------------------------------------------------------------------|-------------------------------------------------|--|
|                                                                                                                                                                                                                                                               | advocacy group,<br>paid or unpaid                                                               |                                                 |  |
| 11                                                                                                                                                                                                                                                            | Stock or stock<br>options                                                                       | <input checked="" type="checkbox"/> <b>None</b> |  |
|                                                                                                                                                                                                                                                               |                                                                                                 |                                                 |  |
|                                                                                                                                                                                                                                                               |                                                                                                 |                                                 |  |
|                                                                                                                                                                                                                                                               |                                                                                                 |                                                 |  |
| 12                                                                                                                                                                                                                                                            | Receipt of<br>equipment,<br>materials, drugs,<br>medical writing,<br>gifts or other<br>services | <input checked="" type="checkbox"/> <b>None</b> |  |
|                                                                                                                                                                                                                                                               |                                                                                                 |                                                 |  |
|                                                                                                                                                                                                                                                               |                                                                                                 |                                                 |  |
|                                                                                                                                                                                                                                                               |                                                                                                 |                                                 |  |
| 13                                                                                                                                                                                                                                                            | Other financial<br>or non-financial<br>interests                                                | <input checked="" type="checkbox"/> <b>None</b> |  |
|                                                                                                                                                                                                                                                               |                                                                                                 |                                                 |  |
|                                                                                                                                                                                                                                                               |                                                                                                 |                                                 |  |
|                                                                                                                                                                                                                                                               |                                                                                                 |                                                 |  |
| <p><b>Please place an "X" next to the following statement to indicate your agreement:</b></p> <p><input checked="" type="checkbox"/> I certify that I have answered every question and have not altered the wording of any of the questions on this form.</p> |                                                                                                 |                                                 |  |

## ICMJE DISCLOSURE FORM

**Date:** 12/10/2021

**Your Name:** Joshua Weinstock

**Manuscript Title:** Clonal Hematopoiesis in Sickle Cell Disease

**Manuscript Number (if known):** 156060-JCI-CMED-RV-2

In the interest of transparency, we ask you to disclose all relationships/activities/interests listed below that are related to the content of your manuscript. "Related" means any relation with for-profit or not-for-profit third parties whose interests may be affected by the content of the manuscript. Disclosure represents a commitment to transparency and does not necessarily indicate a bias. If you are in doubt about whether to list a relationship/activity/interest, it is preferable that you do so.

The author's relationships/activities/interests should be defined broadly. For example, if your manuscript pertains to the epidemiology of hypertension, you should declare all relationships with manufacturers of antihypertensive medication, even if that medication is not mentioned in the manuscript.

In item #1 below, report all support for the work reported in this manuscript without time limit. For all other items, the time frame for disclosure is the past 36 months.

|                                                           |                                                                                                                                                                                | Name all entities with whom you have this relationship or indicate none (add rows as needed)                                                                                                                                                                                                                                                                                                                                                  | Specifications/Comments (e.g., if payments were made to you or to your institution) |                        |  |  |  |  |  |
|-----------------------------------------------------------|--------------------------------------------------------------------------------------------------------------------------------------------------------------------------------|-----------------------------------------------------------------------------------------------------------------------------------------------------------------------------------------------------------------------------------------------------------------------------------------------------------------------------------------------------------------------------------------------------------------------------------------------|-------------------------------------------------------------------------------------|------------------------|--|--|--|--|--|
| <b>Time frame: Since the initial planning of the work</b> |                                                                                                                                                                                |                                                                                                                                                                                                                                                                                                                                                                                                                                               |                                                                                     |                        |  |  |  |  |  |
| <b>1</b>                                                  | All support for the present manuscript (e.g., funding, provision of study materials, medical writing, article processing charges, etc.)<br><b>No time limit for this item.</b> | <div style="display: flex; align-items: flex-start;"> <input checked="" type="checkbox"/> <b>None</b> <table border="1" style="margin-top: 10px; width: 100%; border-collapse: collapse;"> <tr><td style="height: 20px;"></td><td style="height: 20px;"></td></tr> <tr><td style="height: 20px;"></td><td style="height: 20px;"></td></tr> <tr><td style="height: 20px;"></td><td style="height: 20px;"></td></tr> </table> </div>            |                                                                                     |                        |  |  |  |  |  |
|                                                           |                                                                                                                                                                                |                                                                                                                                                                                                                                                                                                                                                                                                                                               |                                                                                     |                        |  |  |  |  |  |
|                                                           |                                                                                                                                                                                |                                                                                                                                                                                                                                                                                                                                                                                                                                               |                                                                                     |                        |  |  |  |  |  |
|                                                           |                                                                                                                                                                                |                                                                                                                                                                                                                                                                                                                                                                                                                                               |                                                                                     |                        |  |  |  |  |  |
| <b>Time frame: past 36 months</b>                         |                                                                                                                                                                                |                                                                                                                                                                                                                                                                                                                                                                                                                                               |                                                                                     |                        |  |  |  |  |  |
| <b>2</b>                                                  | Grants or contracts from any entity (if not indicated in item #1 above).                                                                                                       | <div style="display: flex; align-items: flex-start;"> <input type="checkbox"/> <b>None</b> <table border="1" style="margin-top: 10px; width: 100%; border-collapse: collapse;"> <tr><td style="height: 20px;">NHLBI BioData Catalyst</td><td style="height: 20px;"></td></tr> <tr><td style="height: 20px;"></td><td style="height: 20px;"></td></tr> <tr><td style="height: 20px;"></td><td style="height: 20px;"></td></tr> </table> </div> |                                                                                     | NHLBI BioData Catalyst |  |  |  |  |  |
| NHLBI BioData Catalyst                                    |                                                                                                                                                                                |                                                                                                                                                                                                                                                                                                                                                                                                                                               |                                                                                     |                        |  |  |  |  |  |
|                                                           |                                                                                                                                                                                |                                                                                                                                                                                                                                                                                                                                                                                                                                               |                                                                                     |                        |  |  |  |  |  |
|                                                           |                                                                                                                                                                                |                                                                                                                                                                                                                                                                                                                                                                                                                                               |                                                                                     |                        |  |  |  |  |  |
| <b>3</b>                                                  | Royalties or licenses                                                                                                                                                          | <div style="display: flex; align-items: flex-start;"> <input checked="" type="checkbox"/> <b>None</b> <table border="1" style="margin-top: 10px; width: 100%; border-collapse: collapse;"> <tr><td style="height: 20px;"></td><td style="height: 20px;"></td></tr> <tr><td style="height: 20px;"></td><td style="height: 20px;"></td></tr> <tr><td style="height: 20px;"></td><td style="height: 20px;"></td></tr> </table> </div>            |                                                                                     |                        |  |  |  |  |  |
|                                                           |                                                                                                                                                                                |                                                                                                                                                                                                                                                                                                                                                                                                                                               |                                                                                     |                        |  |  |  |  |  |
|                                                           |                                                                                                                                                                                |                                                                                                                                                                                                                                                                                                                                                                                                                                               |                                                                                     |                        |  |  |  |  |  |
|                                                           |                                                                                                                                                                                |                                                                                                                                                                                                                                                                                                                                                                                                                                               |                                                                                     |                        |  |  |  |  |  |

|                                                                                      |                                                                                                              |                                                                                                                                                                                                                                                                            |                                                                                      |  |  |  |  |  |  |  |
|--------------------------------------------------------------------------------------|--------------------------------------------------------------------------------------------------------------|----------------------------------------------------------------------------------------------------------------------------------------------------------------------------------------------------------------------------------------------------------------------------|--------------------------------------------------------------------------------------|--|--|--|--|--|--|--|
| 4                                                                                    | Consulting fees                                                                                              | <input checked="" type="checkbox"/> <b>None</b> <table border="1" data-bbox="370 205 1507 342"> <tr><td></td><td></td></tr> <tr><td></td><td></td></tr> <tr><td></td><td></td></tr> <tr><td></td><td></td></tr> </table>                                                   |                                                                                      |  |  |  |  |  |  |  |
|                                                                                      |                                                                                                              |                                                                                                                                                                                                                                                                            |                                                                                      |  |  |  |  |  |  |  |
|                                                                                      |                                                                                                              |                                                                                                                                                                                                                                                                            |                                                                                      |  |  |  |  |  |  |  |
|                                                                                      |                                                                                                              |                                                                                                                                                                                                                                                                            |                                                                                      |  |  |  |  |  |  |  |
|                                                                                      |                                                                                                              |                                                                                                                                                                                                                                                                            |                                                                                      |  |  |  |  |  |  |  |
| 5                                                                                    | Payment or honoraria for lectures, presentations, speakers bureaus, manuscript writing or educational events | <input checked="" type="checkbox"/> <b>None</b> <table border="1" data-bbox="370 493 1507 598"> <tr><td></td><td></td></tr> <tr><td></td><td></td></tr> <tr><td></td><td></td></tr> </table>                                                                               |                                                                                      |  |  |  |  |  |  |  |
|                                                                                      |                                                                                                              |                                                                                                                                                                                                                                                                            |                                                                                      |  |  |  |  |  |  |  |
|                                                                                      |                                                                                                              |                                                                                                                                                                                                                                                                            |                                                                                      |  |  |  |  |  |  |  |
|                                                                                      |                                                                                                              |                                                                                                                                                                                                                                                                            |                                                                                      |  |  |  |  |  |  |  |
| 6                                                                                    | Payment for expert testimony                                                                                 | <input checked="" type="checkbox"/> <b>None</b> <table border="1" data-bbox="370 833 1507 938"> <tr><td></td><td></td></tr> <tr><td></td><td></td></tr> <tr><td></td><td></td></tr> </table>                                                                               |                                                                                      |  |  |  |  |  |  |  |
|                                                                                      |                                                                                                              |                                                                                                                                                                                                                                                                            |                                                                                      |  |  |  |  |  |  |  |
|                                                                                      |                                                                                                              |                                                                                                                                                                                                                                                                            |                                                                                      |  |  |  |  |  |  |  |
|                                                                                      |                                                                                                              |                                                                                                                                                                                                                                                                            |                                                                                      |  |  |  |  |  |  |  |
| 7                                                                                    | Support for attending meetings and/or travel                                                                 | <input checked="" type="checkbox"/> <b>None</b> <table border="1" data-bbox="370 1089 1507 1194"> <tr><td></td><td></td></tr> <tr><td></td><td></td></tr> <tr><td></td><td></td></tr> </table>                                                                             |                                                                                      |  |  |  |  |  |  |  |
|                                                                                      |                                                                                                              |                                                                                                                                                                                                                                                                            |                                                                                      |  |  |  |  |  |  |  |
|                                                                                      |                                                                                                              |                                                                                                                                                                                                                                                                            |                                                                                      |  |  |  |  |  |  |  |
|                                                                                      |                                                                                                              |                                                                                                                                                                                                                                                                            |                                                                                      |  |  |  |  |  |  |  |
| 8                                                                                    | Patents planned, issued or pending                                                                           | <input type="checkbox"/> <b>None</b> <table border="1" data-bbox="370 1346 1507 1482"> <tr> <td>J. Weinstock has filed a patent related to a method for estimating clonal expansion.</td> <td></td> </tr> <tr><td></td><td></td></tr> <tr><td></td><td></td></tr> </table> | J. Weinstock has filed a patent related to a method for estimating clonal expansion. |  |  |  |  |  |  |  |
| J. Weinstock has filed a patent related to a method for estimating clonal expansion. |                                                                                                              |                                                                                                                                                                                                                                                                            |                                                                                      |  |  |  |  |  |  |  |
|                                                                                      |                                                                                                              |                                                                                                                                                                                                                                                                            |                                                                                      |  |  |  |  |  |  |  |
|                                                                                      |                                                                                                              |                                                                                                                                                                                                                                                                            |                                                                                      |  |  |  |  |  |  |  |
| 9                                                                                    | Participation on a Data Safety Monitoring Board or Advisory Board                                            | <input checked="" type="checkbox"/> <b>None</b> <table border="1" data-bbox="370 1633 1507 1738"> <tr><td></td><td></td></tr> <tr><td></td><td></td></tr> <tr><td></td><td></td></tr> </table>                                                                             |                                                                                      |  |  |  |  |  |  |  |
|                                                                                      |                                                                                                              |                                                                                                                                                                                                                                                                            |                                                                                      |  |  |  |  |  |  |  |
|                                                                                      |                                                                                                              |                                                                                                                                                                                                                                                                            |                                                                                      |  |  |  |  |  |  |  |
|                                                                                      |                                                                                                              |                                                                                                                                                                                                                                                                            |                                                                                      |  |  |  |  |  |  |  |
| 10                                                                                   | Leadership or fiduciary role in other board, society, committee or                                           | <input checked="" type="checkbox"/> <b>None</b> <table border="1" data-bbox="370 1890 1507 1955"> <tr><td></td><td></td></tr> <tr><td></td><td></td></tr> </table>                                                                                                         |                                                                                      |  |  |  |  |  |  |  |
|                                                                                      |                                                                                                              |                                                                                                                                                                                                                                                                            |                                                                                      |  |  |  |  |  |  |  |
|                                                                                      |                                                                                                              |                                                                                                                                                                                                                                                                            |                                                                                      |  |  |  |  |  |  |  |



|                                                                                                                                                                                                                                                               |                                                                                                 |                                                 |  |
|---------------------------------------------------------------------------------------------------------------------------------------------------------------------------------------------------------------------------------------------------------------|-------------------------------------------------------------------------------------------------|-------------------------------------------------|--|
|                                                                                                                                                                                                                                                               | advocacy group,<br>paid or unpaid                                                               |                                                 |  |
| <b>11</b>                                                                                                                                                                                                                                                     | Stock or stock<br>options                                                                       | <input checked="" type="checkbox"/> <b>None</b> |  |
|                                                                                                                                                                                                                                                               |                                                                                                 |                                                 |  |
|                                                                                                                                                                                                                                                               |                                                                                                 |                                                 |  |
|                                                                                                                                                                                                                                                               |                                                                                                 |                                                 |  |
| <b>12</b>                                                                                                                                                                                                                                                     | Receipt of<br>equipment,<br>materials, drugs,<br>medical writing,<br>gifts or other<br>services | <input checked="" type="checkbox"/> <b>None</b> |  |
|                                                                                                                                                                                                                                                               |                                                                                                 |                                                 |  |
|                                                                                                                                                                                                                                                               |                                                                                                 |                                                 |  |
|                                                                                                                                                                                                                                                               |                                                                                                 |                                                 |  |
| <b>13</b>                                                                                                                                                                                                                                                     | Other financial<br>or non-financial<br>interests                                                | <input checked="" type="checkbox"/> <b>None</b> |  |
|                                                                                                                                                                                                                                                               |                                                                                                 |                                                 |  |
|                                                                                                                                                                                                                                                               |                                                                                                 |                                                 |  |
|                                                                                                                                                                                                                                                               |                                                                                                 |                                                 |  |
| <p><b>Please place an "X" next to the following statement to indicate your agreement:</b></p> <p><input checked="" type="checkbox"/> I certify that I have answered every question and have not altered the wording of any of the questions on this form.</p> |                                                                                                 |                                                 |  |

## ICMJE DISCLOSURE FORM

**Date:** 12/9/2021

**Your Name:** Yingze Zhang

**Manuscript Title:** Clonal Hematopoiesis in Sickle Cell Disease

**Manuscript Number (if known):** 156060-JCI-CMED-RV-2

In the interest of transparency, we ask you to disclose all relationships/activities/interests listed below that are related to the content of your manuscript. "Related" means any relation with for-profit or not-for-profit third parties whose interests may be affected by the content of the manuscript. Disclosure represents a commitment to transparency and does not necessarily indicate a bias. If you are in doubt about whether to list a relationship/activity/interest, it is preferable that you do so.

The author's relationships/activities/interests should be defined broadly. For example, if your manuscript pertains to the epidemiology of hypertension, you should declare all relationships with manufacturers of antihypertensive medication, even if that medication is not mentioned in the manuscript.

In item #1 below, report all support for the work reported in this manuscript without time limit. For all other items, the time frame for disclosure is the past 36 months.

|                                                           |                                                                                                                                                                                | Name all entities with whom you have this relationship or indicate none (add rows as needed)                                                                                                                                                                                                                                                                                                                                       | Specifications/Comments (e.g., if payments were made to you or to your institution) |  |  |  |  |  |  |
|-----------------------------------------------------------|--------------------------------------------------------------------------------------------------------------------------------------------------------------------------------|------------------------------------------------------------------------------------------------------------------------------------------------------------------------------------------------------------------------------------------------------------------------------------------------------------------------------------------------------------------------------------------------------------------------------------|-------------------------------------------------------------------------------------|--|--|--|--|--|--|
| <b>Time frame: Since the initial planning of the work</b> |                                                                                                                                                                                |                                                                                                                                                                                                                                                                                                                                                                                                                                    |                                                                                     |  |  |  |  |  |  |
| <b>1</b>                                                  | All support for the present manuscript (e.g., funding, provision of study materials, medical writing, article processing charges, etc.)<br><b>No time limit for this item.</b> | <div style="display: flex; align-items: flex-start;"> <input checked="" type="checkbox"/> <b>None</b> <table border="1" style="margin-top: 10px; width: 100%; border-collapse: collapse;"> <tr><td style="height: 20px;"></td><td style="height: 20px;"></td></tr> <tr><td style="height: 20px;"></td><td style="height: 20px;"></td></tr> <tr><td style="height: 20px;"></td><td style="height: 20px;"></td></tr> </table> </div> |                                                                                     |  |  |  |  |  |  |
|                                                           |                                                                                                                                                                                |                                                                                                                                                                                                                                                                                                                                                                                                                                    |                                                                                     |  |  |  |  |  |  |
|                                                           |                                                                                                                                                                                |                                                                                                                                                                                                                                                                                                                                                                                                                                    |                                                                                     |  |  |  |  |  |  |
|                                                           |                                                                                                                                                                                |                                                                                                                                                                                                                                                                                                                                                                                                                                    |                                                                                     |  |  |  |  |  |  |
| <b>Time frame: past 36 months</b>                         |                                                                                                                                                                                |                                                                                                                                                                                                                                                                                                                                                                                                                                    |                                                                                     |  |  |  |  |  |  |
| <b>2</b>                                                  | Grants or contracts from any entity (if not indicated in item #1 above).                                                                                                       | <div style="display: flex; align-items: flex-start;"> <input checked="" type="checkbox"/> <b>None</b> <table border="1" style="margin-top: 10px; width: 100%; border-collapse: collapse;"> <tr><td style="height: 20px;"></td><td style="height: 20px;"></td></tr> <tr><td style="height: 20px;"></td><td style="height: 20px;"></td></tr> <tr><td style="height: 20px;"></td><td style="height: 20px;"></td></tr> </table> </div> |                                                                                     |  |  |  |  |  |  |
|                                                           |                                                                                                                                                                                |                                                                                                                                                                                                                                                                                                                                                                                                                                    |                                                                                     |  |  |  |  |  |  |
|                                                           |                                                                                                                                                                                |                                                                                                                                                                                                                                                                                                                                                                                                                                    |                                                                                     |  |  |  |  |  |  |
|                                                           |                                                                                                                                                                                |                                                                                                                                                                                                                                                                                                                                                                                                                                    |                                                                                     |  |  |  |  |  |  |
| <b>3</b>                                                  | Royalties or licenses                                                                                                                                                          | <div style="display: flex; align-items: flex-start;"> <input checked="" type="checkbox"/> <b>None</b> <table border="1" style="margin-top: 10px; width: 100%; border-collapse: collapse;"> <tr><td style="height: 20px;"></td><td style="height: 20px;"></td></tr> <tr><td style="height: 20px;"></td><td style="height: 20px;"></td></tr> <tr><td style="height: 20px;"></td><td style="height: 20px;"></td></tr> </table> </div> |                                                                                     |  |  |  |  |  |  |
|                                                           |                                                                                                                                                                                |                                                                                                                                                                                                                                                                                                                                                                                                                                    |                                                                                     |  |  |  |  |  |  |
|                                                           |                                                                                                                                                                                |                                                                                                                                                                                                                                                                                                                                                                                                                                    |                                                                                     |  |  |  |  |  |  |
|                                                           |                                                                                                                                                                                |                                                                                                                                                                                                                                                                                                                                                                                                                                    |                                                                                     |  |  |  |  |  |  |

|    |                                                                                                              |                                                                                                                                                                                                                          |  |  |  |  |  |  |  |  |
|----|--------------------------------------------------------------------------------------------------------------|--------------------------------------------------------------------------------------------------------------------------------------------------------------------------------------------------------------------------|--|--|--|--|--|--|--|--|
| 4  | Consulting fees                                                                                              | <input checked="" type="checkbox"/> <b>None</b> <table border="1" data-bbox="370 205 1507 342"> <tr><td></td><td></td></tr> <tr><td></td><td></td></tr> <tr><td></td><td></td></tr> <tr><td></td><td></td></tr> </table> |  |  |  |  |  |  |  |  |
|    |                                                                                                              |                                                                                                                                                                                                                          |  |  |  |  |  |  |  |  |
|    |                                                                                                              |                                                                                                                                                                                                                          |  |  |  |  |  |  |  |  |
|    |                                                                                                              |                                                                                                                                                                                                                          |  |  |  |  |  |  |  |  |
|    |                                                                                                              |                                                                                                                                                                                                                          |  |  |  |  |  |  |  |  |
| 5  | Payment or honoraria for lectures, presentations, speakers bureaus, manuscript writing or educational events | <input checked="" type="checkbox"/> <b>None</b> <table border="1" data-bbox="370 493 1507 596"> <tr><td></td><td></td></tr> <tr><td></td><td></td></tr> <tr><td></td><td></td></tr> </table>                             |  |  |  |  |  |  |  |  |
|    |                                                                                                              |                                                                                                                                                                                                                          |  |  |  |  |  |  |  |  |
|    |                                                                                                              |                                                                                                                                                                                                                          |  |  |  |  |  |  |  |  |
|    |                                                                                                              |                                                                                                                                                                                                                          |  |  |  |  |  |  |  |  |
| 6  | Payment for expert testimony                                                                                 | <input checked="" type="checkbox"/> <b>None</b> <table border="1" data-bbox="370 833 1507 936"> <tr><td></td><td></td></tr> <tr><td></td><td></td></tr> <tr><td></td><td></td></tr> </table>                             |  |  |  |  |  |  |  |  |
|    |                                                                                                              |                                                                                                                                                                                                                          |  |  |  |  |  |  |  |  |
|    |                                                                                                              |                                                                                                                                                                                                                          |  |  |  |  |  |  |  |  |
|    |                                                                                                              |                                                                                                                                                                                                                          |  |  |  |  |  |  |  |  |
| 7  | Support for attending meetings and/or travel                                                                 | <input checked="" type="checkbox"/> <b>None</b> <table border="1" data-bbox="370 1089 1507 1192"> <tr><td></td><td></td></tr> <tr><td></td><td></td></tr> <tr><td></td><td></td></tr> </table>                           |  |  |  |  |  |  |  |  |
|    |                                                                                                              |                                                                                                                                                                                                                          |  |  |  |  |  |  |  |  |
|    |                                                                                                              |                                                                                                                                                                                                                          |  |  |  |  |  |  |  |  |
|    |                                                                                                              |                                                                                                                                                                                                                          |  |  |  |  |  |  |  |  |
| 8  | Patents planned, issued or pending                                                                           | <input checked="" type="checkbox"/> <b>None</b> <table border="1" data-bbox="370 1346 1507 1449"> <tr><td></td><td></td></tr> <tr><td></td><td></td></tr> <tr><td></td><td></td></tr> </table>                           |  |  |  |  |  |  |  |  |
|    |                                                                                                              |                                                                                                                                                                                                                          |  |  |  |  |  |  |  |  |
|    |                                                                                                              |                                                                                                                                                                                                                          |  |  |  |  |  |  |  |  |
|    |                                                                                                              |                                                                                                                                                                                                                          |  |  |  |  |  |  |  |  |
| 9  | Participation on a Data Safety Monitoring Board or Advisory Board                                            | <input checked="" type="checkbox"/> <b>None</b> <table border="1" data-bbox="370 1602 1507 1705"> <tr><td></td><td></td></tr> <tr><td></td><td></td></tr> <tr><td></td><td></td></tr> </table>                           |  |  |  |  |  |  |  |  |
|    |                                                                                                              |                                                                                                                                                                                                                          |  |  |  |  |  |  |  |  |
|    |                                                                                                              |                                                                                                                                                                                                                          |  |  |  |  |  |  |  |  |
|    |                                                                                                              |                                                                                                                                                                                                                          |  |  |  |  |  |  |  |  |
| 10 | Leadership or fiduciary role in other board, society, committee or                                           | <input checked="" type="checkbox"/> <b>None</b> <table border="1" data-bbox="370 1858 1507 1961"> <tr><td></td><td></td></tr> <tr><td></td><td></td></tr> <tr><td></td><td></td></tr> </table>                           |  |  |  |  |  |  |  |  |
|    |                                                                                                              |                                                                                                                                                                                                                          |  |  |  |  |  |  |  |  |
|    |                                                                                                              |                                                                                                                                                                                                                          |  |  |  |  |  |  |  |  |
|    |                                                                                                              |                                                                                                                                                                                                                          |  |  |  |  |  |  |  |  |

|                                                                                                                                                                                                                                                               |                                                                                                 |                                                 |  |
|---------------------------------------------------------------------------------------------------------------------------------------------------------------------------------------------------------------------------------------------------------------|-------------------------------------------------------------------------------------------------|-------------------------------------------------|--|
|                                                                                                                                                                                                                                                               | advocacy group,<br>paid or unpaid                                                               |                                                 |  |
| 11                                                                                                                                                                                                                                                            | Stock or stock<br>options                                                                       | <input checked="" type="checkbox"/> <b>None</b> |  |
|                                                                                                                                                                                                                                                               |                                                                                                 |                                                 |  |
|                                                                                                                                                                                                                                                               |                                                                                                 |                                                 |  |
|                                                                                                                                                                                                                                                               |                                                                                                 |                                                 |  |
| 12                                                                                                                                                                                                                                                            | Receipt of<br>equipment,<br>materials, drugs,<br>medical writing,<br>gifts or other<br>services | <input checked="" type="checkbox"/> <b>None</b> |  |
|                                                                                                                                                                                                                                                               |                                                                                                 |                                                 |  |
|                                                                                                                                                                                                                                                               |                                                                                                 |                                                 |  |
|                                                                                                                                                                                                                                                               |                                                                                                 |                                                 |  |
| 13                                                                                                                                                                                                                                                            | Other financial<br>or non-financial<br>interests                                                | <input checked="" type="checkbox"/> <b>None</b> |  |
|                                                                                                                                                                                                                                                               |                                                                                                 |                                                 |  |
|                                                                                                                                                                                                                                                               |                                                                                                 |                                                 |  |
|                                                                                                                                                                                                                                                               |                                                                                                 |                                                 |  |
| <p><b>Please place an "X" next to the following statement to indicate your agreement:</b></p> <p><input checked="" type="checkbox"/> I certify that I have answered every question and have not altered the wording of any of the questions on this form.</p> |                                                                                                 |                                                 |  |

## ICMJE DISCLOSURE FORM

**Date:** 12/9/2021

**Your Name:** S. Mehdi Nouraie

**Manuscript Title:** Clonal Hematopoiesis in Sickle Cell Disease

**Manuscript Number (if known):** 156060-JCI-CMED-RV-2

In the interest of transparency, we ask you to disclose all relationships/activities/interests listed below that are related to the content of your manuscript. "Related" means any relation with for-profit or not-for-profit third parties whose interests may be affected by the content of the manuscript. Disclosure represents a commitment to transparency and does not necessarily indicate a bias. If you are in doubt about whether to list a relationship/activity/interest, it is preferable that you do so.

The author's relationships/activities/interests should be defined broadly. For example, if your manuscript pertains to the epidemiology of hypertension, you should declare all relationships with manufacturers of antihypertensive medication, even if that medication is not mentioned in the manuscript.

In item #1 below, report all support for the work reported in this manuscript without time limit. For all other items, the time frame for disclosure is the past 36 months.

|                                                           |                                                                                                                                                                                | Name all entities with whom you have this relationship or indicate none (add rows as needed)                                                                                                                                                                                                                                                                                                                                 | Specifications/Comments (e.g., if payments were made to you or to your institution) |     |                               |  |  |  |  |
|-----------------------------------------------------------|--------------------------------------------------------------------------------------------------------------------------------------------------------------------------------|------------------------------------------------------------------------------------------------------------------------------------------------------------------------------------------------------------------------------------------------------------------------------------------------------------------------------------------------------------------------------------------------------------------------------|-------------------------------------------------------------------------------------|-----|-------------------------------|--|--|--|--|
| <b>Time frame: Since the initial planning of the work</b> |                                                                                                                                                                                |                                                                                                                                                                                                                                                                                                                                                                                                                              |                                                                                     |     |                               |  |  |  |  |
| 1                                                         | All support for the present manuscript (e.g., funding, provision of study materials, medical writing, article processing charges, etc.)<br><b>No time limit for this item.</b> | <div style="display: flex; align-items: flex-start;"> <input checked="" type="checkbox"/> <b>None</b> </div> <table border="1" style="width: 100%; margin-top: 10px;"> <tr><td style="height: 20px;"></td><td style="height: 20px;"></td></tr> <tr><td style="height: 20px;"></td><td style="height: 20px;"></td></tr> <tr><td style="height: 20px;"></td><td style="height: 20px;"></td></tr> </table>                      |                                                                                     |     |                               |  |  |  |  |
|                                                           |                                                                                                                                                                                |                                                                                                                                                                                                                                                                                                                                                                                                                              |                                                                                     |     |                               |  |  |  |  |
|                                                           |                                                                                                                                                                                |                                                                                                                                                                                                                                                                                                                                                                                                                              |                                                                                     |     |                               |  |  |  |  |
|                                                           |                                                                                                                                                                                |                                                                                                                                                                                                                                                                                                                                                                                                                              |                                                                                     |     |                               |  |  |  |  |
| <b>Time frame: past 36 months</b>                         |                                                                                                                                                                                |                                                                                                                                                                                                                                                                                                                                                                                                                              |                                                                                     |     |                               |  |  |  |  |
| 2                                                         | Grants or contracts from any entity (if not indicated in item #1 above).                                                                                                       | <div style="display: flex; align-items: flex-start;"> <input type="checkbox"/> <b>None</b> </div> <table border="1" style="width: 100%; margin-top: 10px;"> <tr><td style="height: 20px;">NIH</td><td style="height: 20px;">Unrelated to this manuscript.</td></tr> <tr><td style="height: 20px;"></td><td style="height: 20px;"></td></tr> <tr><td style="height: 20px;"></td><td style="height: 20px;"></td></tr> </table> |                                                                                     | NIH | Unrelated to this manuscript. |  |  |  |  |
| NIH                                                       | Unrelated to this manuscript.                                                                                                                                                  |                                                                                                                                                                                                                                                                                                                                                                                                                              |                                                                                     |     |                               |  |  |  |  |
|                                                           |                                                                                                                                                                                |                                                                                                                                                                                                                                                                                                                                                                                                                              |                                                                                     |     |                               |  |  |  |  |
|                                                           |                                                                                                                                                                                |                                                                                                                                                                                                                                                                                                                                                                                                                              |                                                                                     |     |                               |  |  |  |  |
| 3                                                         | Royalties or licenses                                                                                                                                                          | <div style="display: flex; align-items: flex-start;"> <input checked="" type="checkbox"/> <b>None</b> </div> <table border="1" style="width: 100%; margin-top: 10px;"> <tr><td style="height: 20px;"></td><td style="height: 20px;"></td></tr> <tr><td style="height: 20px;"></td><td style="height: 20px;"></td></tr> <tr><td style="height: 20px;"></td><td style="height: 20px;"></td></tr> </table>                      |                                                                                     |     |                               |  |  |  |  |
|                                                           |                                                                                                                                                                                |                                                                                                                                                                                                                                                                                                                                                                                                                              |                                                                                     |     |                               |  |  |  |  |
|                                                           |                                                                                                                                                                                |                                                                                                                                                                                                                                                                                                                                                                                                                              |                                                                                     |     |                               |  |  |  |  |
|                                                           |                                                                                                                                                                                |                                                                                                                                                                                                                                                                                                                                                                                                                              |                                                                                     |     |                               |  |  |  |  |

|                       |                                                                                                              |                                                                                                                                                                                                                                                                                                   |  |                       |                                               |  |  |  |  |  |  |
|-----------------------|--------------------------------------------------------------------------------------------------------------|---------------------------------------------------------------------------------------------------------------------------------------------------------------------------------------------------------------------------------------------------------------------------------------------------|--|-----------------------|-----------------------------------------------|--|--|--|--|--|--|
| 4                     | Consulting fees                                                                                              | <input type="checkbox"/> <b>None</b> <table border="1" data-bbox="370 205 1507 342"> <tr> <td>Phoenicia BioSciences</td> <td>Made to me but unrelated to this publication.</td> </tr> <tr> <td> </td> <td> </td> </tr> <tr> <td> </td> <td> </td> </tr> <tr> <td> </td> <td> </td> </tr> </table> |  | Phoenicia BioSciences | Made to me but unrelated to this publication. |  |  |  |  |  |  |
| Phoenicia BioSciences | Made to me but unrelated to this publication.                                                                |                                                                                                                                                                                                                                                                                                   |  |                       |                                               |  |  |  |  |  |  |
|                       |                                                                                                              |                                                                                                                                                                                                                                                                                                   |  |                       |                                               |  |  |  |  |  |  |
|                       |                                                                                                              |                                                                                                                                                                                                                                                                                                   |  |                       |                                               |  |  |  |  |  |  |
|                       |                                                                                                              |                                                                                                                                                                                                                                                                                                   |  |                       |                                               |  |  |  |  |  |  |
| 5                     | Payment or honoraria for lectures, presentations, speakers bureaus, manuscript writing or educational events | <input checked="" type="checkbox"/> <b>None</b> <table border="1" data-bbox="370 495 1507 596"> <tr> <td> </td> <td> </td> </tr> <tr> <td> </td> <td> </td> </tr> <tr> <td> </td> <td> </td> </tr> </table>                                                                                       |  |                       |                                               |  |  |  |  |  |  |
|                       |                                                                                                              |                                                                                                                                                                                                                                                                                                   |  |                       |                                               |  |  |  |  |  |  |
|                       |                                                                                                              |                                                                                                                                                                                                                                                                                                   |  |                       |                                               |  |  |  |  |  |  |
|                       |                                                                                                              |                                                                                                                                                                                                                                                                                                   |  |                       |                                               |  |  |  |  |  |  |
| 6                     | Payment for expert testimony                                                                                 | <input checked="" type="checkbox"/> <b>None</b> <table border="1" data-bbox="370 833 1507 936"> <tr> <td> </td> <td> </td> </tr> <tr> <td> </td> <td> </td> </tr> <tr> <td> </td> <td> </td> </tr> </table>                                                                                       |  |                       |                                               |  |  |  |  |  |  |
|                       |                                                                                                              |                                                                                                                                                                                                                                                                                                   |  |                       |                                               |  |  |  |  |  |  |
|                       |                                                                                                              |                                                                                                                                                                                                                                                                                                   |  |                       |                                               |  |  |  |  |  |  |
|                       |                                                                                                              |                                                                                                                                                                                                                                                                                                   |  |                       |                                               |  |  |  |  |  |  |
| 7                     | Support for attending meetings and/or travel                                                                 | <input checked="" type="checkbox"/> <b>None</b> <table border="1" data-bbox="370 1092 1507 1192"> <tr> <td> </td> <td> </td> </tr> <tr> <td> </td> <td> </td> </tr> <tr> <td> </td> <td> </td> </tr> </table>                                                                                     |  |                       |                                               |  |  |  |  |  |  |
|                       |                                                                                                              |                                                                                                                                                                                                                                                                                                   |  |                       |                                               |  |  |  |  |  |  |
|                       |                                                                                                              |                                                                                                                                                                                                                                                                                                   |  |                       |                                               |  |  |  |  |  |  |
|                       |                                                                                                              |                                                                                                                                                                                                                                                                                                   |  |                       |                                               |  |  |  |  |  |  |
| 8                     | Patents planned, issued or pending                                                                           | <input checked="" type="checkbox"/> <b>None</b> <table border="1" data-bbox="370 1348 1507 1449"> <tr> <td> </td> <td> </td> </tr> <tr> <td> </td> <td> </td> </tr> <tr> <td> </td> <td> </td> </tr> </table>                                                                                     |  |                       |                                               |  |  |  |  |  |  |
|                       |                                                                                                              |                                                                                                                                                                                                                                                                                                   |  |                       |                                               |  |  |  |  |  |  |
|                       |                                                                                                              |                                                                                                                                                                                                                                                                                                   |  |                       |                                               |  |  |  |  |  |  |
|                       |                                                                                                              |                                                                                                                                                                                                                                                                                                   |  |                       |                                               |  |  |  |  |  |  |
| 9                     | Participation on a Data Safety Monitoring Board or Advisory Board                                            | <input type="checkbox"/> <b>None</b> <table border="1" data-bbox="370 1604 1507 1705"> <tr> <td>Phoenicia BioSciences</td> <td>Made to me but unrelated to this publication.</td> </tr> <tr> <td> </td> <td> </td> </tr> <tr> <td> </td> <td> </td> </tr> </table>                                |  | Phoenicia BioSciences | Made to me but unrelated to this publication. |  |  |  |  |  |  |
| Phoenicia BioSciences | Made to me but unrelated to this publication.                                                                |                                                                                                                                                                                                                                                                                                   |  |                       |                                               |  |  |  |  |  |  |
|                       |                                                                                                              |                                                                                                                                                                                                                                                                                                   |  |                       |                                               |  |  |  |  |  |  |
|                       |                                                                                                              |                                                                                                                                                                                                                                                                                                   |  |                       |                                               |  |  |  |  |  |  |
| 10                    | Leadership or fiduciary role in other board, society, committee or                                           | <input checked="" type="checkbox"/> <b>None</b> <table border="1" data-bbox="370 1860 1507 1961"> <tr> <td> </td> <td> </td> </tr> <tr> <td> </td> <td> </td> </tr> <tr> <td> </td> <td> </td> </tr> </table>                                                                                     |  |                       |                                               |  |  |  |  |  |  |
|                       |                                                                                                              |                                                                                                                                                                                                                                                                                                   |  |                       |                                               |  |  |  |  |  |  |
|                       |                                                                                                              |                                                                                                                                                                                                                                                                                                   |  |                       |                                               |  |  |  |  |  |  |
|                       |                                                                                                              |                                                                                                                                                                                                                                                                                                   |  |                       |                                               |  |  |  |  |  |  |

|                                                                                                                                                                                                                                                               |                                                                                                 |                                                 |  |
|---------------------------------------------------------------------------------------------------------------------------------------------------------------------------------------------------------------------------------------------------------------|-------------------------------------------------------------------------------------------------|-------------------------------------------------|--|
|                                                                                                                                                                                                                                                               | advocacy group,<br>paid or unpaid                                                               |                                                 |  |
| 11                                                                                                                                                                                                                                                            | Stock or stock<br>options                                                                       | <input checked="" type="checkbox"/> <b>None</b> |  |
|                                                                                                                                                                                                                                                               |                                                                                                 |                                                 |  |
|                                                                                                                                                                                                                                                               |                                                                                                 |                                                 |  |
|                                                                                                                                                                                                                                                               |                                                                                                 |                                                 |  |
| 12                                                                                                                                                                                                                                                            | Receipt of<br>equipment,<br>materials, drugs,<br>medical writing,<br>gifts or other<br>services | <input checked="" type="checkbox"/> <b>None</b> |  |
|                                                                                                                                                                                                                                                               |                                                                                                 |                                                 |  |
|                                                                                                                                                                                                                                                               |                                                                                                 |                                                 |  |
|                                                                                                                                                                                                                                                               |                                                                                                 |                                                 |  |
| 13                                                                                                                                                                                                                                                            | Other financial<br>or non-financial<br>interests                                                | <input checked="" type="checkbox"/> <b>None</b> |  |
|                                                                                                                                                                                                                                                               |                                                                                                 |                                                 |  |
|                                                                                                                                                                                                                                                               |                                                                                                 |                                                 |  |
|                                                                                                                                                                                                                                                               |                                                                                                 |                                                 |  |
| <p><b>Please place an "X" next to the following statement to indicate your agreement:</b></p> <p><input checked="" type="checkbox"/> I certify that I have answered every question and have not altered the wording of any of the questions on this form.</p> |                                                                                                 |                                                 |  |

## ICMJE DISCLOSURE FORM

**Date:** 12/9/2021

**Your Name:** Mark Gladwin

**Manuscript Title:** Clonal Hematopoiesis in Sickle Cell Disease

**Manuscript Number (if known):** 156060-JCI-CMED-RV-2

In the interest of transparency, we ask you to disclose all relationships/activities/interests listed below that are related to the content of your manuscript. "Related" means any relation with for-profit or not-for-profit third parties whose interests may be affected by the content of the manuscript. Disclosure represents a commitment to transparency and does not necessarily indicate a bias. If you are in doubt about whether to list a relationship/activity/interest, it is preferable that you do so.

The author's relationships/activities/interests should be defined broadly. For example, if your manuscript pertains to the epidemiology of hypertension, you should declare all relationships with manufacturers of antihypertensive medication, even if that medication is not mentioned in the manuscript.

In item #1 below, report all support for the work reported in this manuscript without time limit. For all other items, the time frame for disclosure is the past 36 months.

|                                                                                                                                                                                               | Name all entities with whom you have this relationship or indicate none (add rows as needed)                                                                                   | Specifications/Comments (e.g., if payments were made to you or to your institution)                                                                                                                                                                                                                                                                                                                                                                                        |                                                                                                                                                                                               |  |  |  |  |                                           |
|-----------------------------------------------------------------------------------------------------------------------------------------------------------------------------------------------|--------------------------------------------------------------------------------------------------------------------------------------------------------------------------------|----------------------------------------------------------------------------------------------------------------------------------------------------------------------------------------------------------------------------------------------------------------------------------------------------------------------------------------------------------------------------------------------------------------------------------------------------------------------------|-----------------------------------------------------------------------------------------------------------------------------------------------------------------------------------------------|--|--|--|--|-------------------------------------------|
| <b>Time frame: Since the initial planning of the work</b>                                                                                                                                     |                                                                                                                                                                                |                                                                                                                                                                                                                                                                                                                                                                                                                                                                            |                                                                                                                                                                                               |  |  |  |  |                                           |
| <b>1</b>                                                                                                                                                                                      | All support for the present manuscript (e.g., funding, provision of study materials, medical writing, article processing charges, etc.)<br><b>No time limit for this item.</b> | <div style="margin-bottom: 10px;"> <input type="checkbox"/> <b>None</b> </div> <table border="1" style="width: 100%; border-collapse: collapse;"> <tr> <td style="width: 60%;">HHSN268200617182C</td> <td></td> </tr> <tr> <td> </td> <td></td> </tr> <tr> <td> </td> <td>Click the tab key to add additional rows.</td> </tr> </table>                                                                                                                                    | HHSN268200617182C                                                                                                                                                                             |  |  |  |  | Click the tab key to add additional rows. |
| HHSN268200617182C                                                                                                                                                                             |                                                                                                                                                                                |                                                                                                                                                                                                                                                                                                                                                                                                                                                                            |                                                                                                                                                                                               |  |  |  |  |                                           |
|                                                                                                                                                                                               |                                                                                                                                                                                |                                                                                                                                                                                                                                                                                                                                                                                                                                                                            |                                                                                                                                                                                               |  |  |  |  |                                           |
|                                                                                                                                                                                               | Click the tab key to add additional rows.                                                                                                                                      |                                                                                                                                                                                                                                                                                                                                                                                                                                                                            |                                                                                                                                                                                               |  |  |  |  |                                           |
| <b>Time frame: past 36 months</b>                                                                                                                                                             |                                                                                                                                                                                |                                                                                                                                                                                                                                                                                                                                                                                                                                                                            |                                                                                                                                                                                               |  |  |  |  |                                           |
| <b>2</b>                                                                                                                                                                                      | Grants or contracts from any entity (if not indicated in item #1 above).                                                                                                       | <div style="margin-bottom: 10px;"> <input type="checkbox"/> <b>None</b> </div> <table border="1" style="width: 100%; border-collapse: collapse;"> <tr> <td style="width: 60%;">Dr. Gladwin is a principal investigator in a research collaboration with Bayer Pharmaceuticals to evaluate riociguat as a treatment for patients with SCD. Not related to manuscript subject.</td> <td></td> </tr> <tr> <td> </td> <td></td> </tr> <tr> <td> </td> <td></td> </tr> </table> | Dr. Gladwin is a principal investigator in a research collaboration with Bayer Pharmaceuticals to evaluate riociguat as a treatment for patients with SCD. Not related to manuscript subject. |  |  |  |  |                                           |
| Dr. Gladwin is a principal investigator in a research collaboration with Bayer Pharmaceuticals to evaluate riociguat as a treatment for patients with SCD. Not related to manuscript subject. |                                                                                                                                                                                |                                                                                                                                                                                                                                                                                                                                                                                                                                                                            |                                                                                                                                                                                               |  |  |  |  |                                           |
|                                                                                                                                                                                               |                                                                                                                                                                                |                                                                                                                                                                                                                                                                                                                                                                                                                                                                            |                                                                                                                                                                                               |  |  |  |  |                                           |
|                                                                                                                                                                                               |                                                                                                                                                                                |                                                                                                                                                                                                                                                                                                                                                                                                                                                                            |                                                                                                                                                                                               |  |  |  |  |                                           |



|                                                                                                                                                                                                                                          |                                                                                                              |                                                                                                                                                                                                                                                                                                                                                                                                                                                                                                                                                                                                                                                       |  |                                                                                                                                                                                                                                          |  |  |  |  |  |  |  |
|------------------------------------------------------------------------------------------------------------------------------------------------------------------------------------------------------------------------------------------|--------------------------------------------------------------------------------------------------------------|-------------------------------------------------------------------------------------------------------------------------------------------------------------------------------------------------------------------------------------------------------------------------------------------------------------------------------------------------------------------------------------------------------------------------------------------------------------------------------------------------------------------------------------------------------------------------------------------------------------------------------------------------------|--|------------------------------------------------------------------------------------------------------------------------------------------------------------------------------------------------------------------------------------------|--|--|--|--|--|--|--|
| 3                                                                                                                                                                                                                                        | Royalties or licenses                                                                                        | <input type="checkbox"/> <b>None</b> <table border="1" data-bbox="370 205 1503 338"> <tr> <td data-bbox="370 205 938 268">Textbook authorship royalties (MedMaster) – not related to manuscript subject.</td> <td data-bbox="938 205 1503 268"></td> </tr> <tr> <td data-bbox="370 268 938 300"></td> <td data-bbox="938 268 1503 300"></td> </tr> <tr> <td data-bbox="370 300 938 338"></td> <td data-bbox="938 300 1503 338"></td> </tr> </table>                                                                                                                                                                                                   |  | Textbook authorship royalties (MedMaster) – not related to manuscript subject.                                                                                                                                                           |  |  |  |  |  |  |  |
| Textbook authorship royalties (MedMaster) – not related to manuscript subject.                                                                                                                                                           |                                                                                                              |                                                                                                                                                                                                                                                                                                                                                                                                                                                                                                                                                                                                                                                       |  |                                                                                                                                                                                                                                          |  |  |  |  |  |  |  |
|                                                                                                                                                                                                                                          |                                                                                                              |                                                                                                                                                                                                                                                                                                                                                                                                                                                                                                                                                                                                                                                       |  |                                                                                                                                                                                                                                          |  |  |  |  |  |  |  |
|                                                                                                                                                                                                                                          |                                                                                                              |                                                                                                                                                                                                                                                                                                                                                                                                                                                                                                                                                                                                                                                       |  |                                                                                                                                                                                                                                          |  |  |  |  |  |  |  |
| 4                                                                                                                                                                                                                                        | Consulting fees                                                                                              | <input type="checkbox"/> <b>None</b> <table border="1" data-bbox="370 491 1503 724"> <tr> <td data-bbox="370 491 938 623">Dr. Gladwin is actively serving as a scientific consultant for Actelion, Bayer Healthcare, Pfizer, Forma, and Fulcrum Therapeutics. Not related to the subject matter in the manuscript.</td> <td data-bbox="938 491 1503 623"></td> </tr> <tr> <td data-bbox="370 623 938 655"></td> <td data-bbox="938 623 1503 655"></td> </tr> <tr> <td data-bbox="370 655 938 686"></td> <td data-bbox="938 655 1503 686"></td> </tr> <tr> <td data-bbox="370 686 938 724"></td> <td data-bbox="938 686 1503 724"></td> </tr> </table> |  | Dr. Gladwin is actively serving as a scientific consultant for Actelion, Bayer Healthcare, Pfizer, Forma, and Fulcrum Therapeutics. Not related to the subject matter in the manuscript.                                                 |  |  |  |  |  |  |  |
| Dr. Gladwin is actively serving as a scientific consultant for Actelion, Bayer Healthcare, Pfizer, Forma, and Fulcrum Therapeutics. Not related to the subject matter in the manuscript.                                                 |                                                                                                              |                                                                                                                                                                                                                                                                                                                                                                                                                                                                                                                                                                                                                                                       |  |                                                                                                                                                                                                                                          |  |  |  |  |  |  |  |
|                                                                                                                                                                                                                                          |                                                                                                              |                                                                                                                                                                                                                                                                                                                                                                                                                                                                                                                                                                                                                                                       |  |                                                                                                                                                                                                                                          |  |  |  |  |  |  |  |
|                                                                                                                                                                                                                                          |                                                                                                              |                                                                                                                                                                                                                                                                                                                                                                                                                                                                                                                                                                                                                                                       |  |                                                                                                                                                                                                                                          |  |  |  |  |  |  |  |
|                                                                                                                                                                                                                                          |                                                                                                              |                                                                                                                                                                                                                                                                                                                                                                                                                                                                                                                                                                                                                                                       |  |                                                                                                                                                                                                                                          |  |  |  |  |  |  |  |
| 5                                                                                                                                                                                                                                        | Payment or honoraria for lectures, presentations, speakers bureaus, manuscript writing or educational events | <input checked="" type="checkbox"/> <b>None</b> <table border="1" data-bbox="370 877 1503 980"> <tr> <td data-bbox="370 877 938 909"></td> <td data-bbox="938 877 1503 909"></td> </tr> <tr> <td data-bbox="370 909 938 940"></td> <td data-bbox="938 909 1503 940"></td> </tr> <tr> <td data-bbox="370 940 938 980"></td> <td data-bbox="938 940 1503 980"></td> </tr> </table>                                                                                                                                                                                                                                                                      |  |                                                                                                                                                                                                                                          |  |  |  |  |  |  |  |
|                                                                                                                                                                                                                                          |                                                                                                              |                                                                                                                                                                                                                                                                                                                                                                                                                                                                                                                                                                                                                                                       |  |                                                                                                                                                                                                                                          |  |  |  |  |  |  |  |
|                                                                                                                                                                                                                                          |                                                                                                              |                                                                                                                                                                                                                                                                                                                                                                                                                                                                                                                                                                                                                                                       |  |                                                                                                                                                                                                                                          |  |  |  |  |  |  |  |
|                                                                                                                                                                                                                                          |                                                                                                              |                                                                                                                                                                                                                                                                                                                                                                                                                                                                                                                                                                                                                                                       |  |                                                                                                                                                                                                                                          |  |  |  |  |  |  |  |
| 6                                                                                                                                                                                                                                        | Payment for expert testimony                                                                                 | <input checked="" type="checkbox"/> <b>None</b> <table border="1" data-bbox="370 1218 1503 1320"> <tr> <td data-bbox="370 1218 938 1249"></td> <td data-bbox="938 1218 1503 1249"></td> </tr> <tr> <td data-bbox="370 1249 938 1281"></td> <td data-bbox="938 1249 1503 1281"></td> </tr> <tr> <td data-bbox="370 1281 938 1320"></td> <td data-bbox="938 1281 1503 1320"></td> </tr> </table>                                                                                                                                                                                                                                                        |  |                                                                                                                                                                                                                                          |  |  |  |  |  |  |  |
|                                                                                                                                                                                                                                          |                                                                                                              |                                                                                                                                                                                                                                                                                                                                                                                                                                                                                                                                                                                                                                                       |  |                                                                                                                                                                                                                                          |  |  |  |  |  |  |  |
|                                                                                                                                                                                                                                          |                                                                                                              |                                                                                                                                                                                                                                                                                                                                                                                                                                                                                                                                                                                                                                                       |  |                                                                                                                                                                                                                                          |  |  |  |  |  |  |  |
|                                                                                                                                                                                                                                          |                                                                                                              |                                                                                                                                                                                                                                                                                                                                                                                                                                                                                                                                                                                                                                                       |  |                                                                                                                                                                                                                                          |  |  |  |  |  |  |  |
| 7                                                                                                                                                                                                                                        | Support for attending meetings and/or travel                                                                 | <input checked="" type="checkbox"/> <b>None</b> <table border="1" data-bbox="370 1474 1503 1577"> <tr> <td data-bbox="370 1474 938 1505"></td> <td data-bbox="938 1474 1503 1505"></td> </tr> <tr> <td data-bbox="370 1505 938 1537"></td> <td data-bbox="938 1505 1503 1537"></td> </tr> <tr> <td data-bbox="370 1537 938 1577"></td> <td data-bbox="938 1537 1503 1577"></td> </tr> </table>                                                                                                                                                                                                                                                        |  |                                                                                                                                                                                                                                          |  |  |  |  |  |  |  |
|                                                                                                                                                                                                                                          |                                                                                                              |                                                                                                                                                                                                                                                                                                                                                                                                                                                                                                                                                                                                                                                       |  |                                                                                                                                                                                                                                          |  |  |  |  |  |  |  |
|                                                                                                                                                                                                                                          |                                                                                                              |                                                                                                                                                                                                                                                                                                                                                                                                                                                                                                                                                                                                                                                       |  |                                                                                                                                                                                                                                          |  |  |  |  |  |  |  |
|                                                                                                                                                                                                                                          |                                                                                                              |                                                                                                                                                                                                                                                                                                                                                                                                                                                                                                                                                                                                                                                       |  |                                                                                                                                                                                                                                          |  |  |  |  |  |  |  |
| 8                                                                                                                                                                                                                                        | Patents planned, issued or pending                                                                           | <input type="checkbox"/> <b>None</b> <table border="1" data-bbox="370 1730 1503 1959"> <tr> <td data-bbox="370 1730 938 1959">Dr. Gladwin is a co-inventor of patents and patent applications directed to the use of recombinant neuroglobin and heme-based molecules as antidotes for CO poisoning, which have been licensed by Globin Solutions, Inc. Dr. Gladwin is</td> <td data-bbox="938 1730 1503 1959"></td> </tr> </table>                                                                                                                                                                                                                   |  | Dr. Gladwin is a co-inventor of patents and patent applications directed to the use of recombinant neuroglobin and heme-based molecules as antidotes for CO poisoning, which have been licensed by Globin Solutions, Inc. Dr. Gladwin is |  |  |  |  |  |  |  |
| Dr. Gladwin is a co-inventor of patents and patent applications directed to the use of recombinant neuroglobin and heme-based molecules as antidotes for CO poisoning, which have been licensed by Globin Solutions, Inc. Dr. Gladwin is |                                                                                                              |                                                                                                                                                                                                                                                                                                                                                                                                                                                                                                                                                                                                                                                       |  |                                                                                                                                                                                                                                          |  |  |  |  |  |  |  |

|    |                                                                                                   |                                                                                                                                                                                                                                                                        |  |
|----|---------------------------------------------------------------------------------------------------|------------------------------------------------------------------------------------------------------------------------------------------------------------------------------------------------------------------------------------------------------------------------|--|
|    |                                                                                                   | <p>also co-inventor on patents directed to the use of nitrite salts in cardiovascular diseases, which were previously licensed to United Therapeutics, and is now licensed to Globin Solutions and Hope Pharmaceuticals. Not related to manuscript subject matter.</p> |  |
|    |                                                                                                   |                                                                                                                                                                                                                                                                        |  |
|    |                                                                                                   |                                                                                                                                                                                                                                                                        |  |
| 9  | Participation on a Data Safety Monitoring Board or Advisory Board                                 | <input checked="" type="checkbox"/> <b>None</b>                                                                                                                                                                                                                        |  |
|    |                                                                                                   |                                                                                                                                                                                                                                                                        |  |
|    |                                                                                                   |                                                                                                                                                                                                                                                                        |  |
|    |                                                                                                   |                                                                                                                                                                                                                                                                        |  |
| 10 | Leadership or fiduciary role in other board, society, committee or advocacy group, paid or unpaid | <input type="checkbox"/> <b>None</b>                                                                                                                                                                                                                                   |  |
|    |                                                                                                   | NHLBI Sickle Cell Disease Advisory Committee. SCDAC                                                                                                                                                                                                                    |  |
|    |                                                                                                   |                                                                                                                                                                                                                                                                        |  |
|    |                                                                                                   |                                                                                                                                                                                                                                                                        |  |
| 11 | Stock or stock options                                                                            | <input checked="" type="checkbox"/> <b>None</b>                                                                                                                                                                                                                        |  |
|    |                                                                                                   |                                                                                                                                                                                                                                                                        |  |
|    |                                                                                                   |                                                                                                                                                                                                                                                                        |  |
|    |                                                                                                   |                                                                                                                                                                                                                                                                        |  |
| 12 | Receipt of equipment, materials, drugs, medical writing, gifts or other services                  | <input checked="" type="checkbox"/> <b>None</b>                                                                                                                                                                                                                        |  |
|    |                                                                                                   |                                                                                                                                                                                                                                                                        |  |
|    |                                                                                                   |                                                                                                                                                                                                                                                                        |  |
|    |                                                                                                   |                                                                                                                                                                                                                                                                        |  |
| 13 | Other financial or non-financial interests                                                        | <input type="checkbox"/> <b>None</b>                                                                                                                                                                                                                                   |  |
|    |                                                                                                   | Dr. Gladwin is a shareholder, advisor, and director in Globin Solutions, Inc. This is a CO-poisoning related company, not related to the subject matter in the manuscript.                                                                                             |  |
|    |                                                                                                   |                                                                                                                                                                                                                                                                        |  |
|    |                                                                                                   |                                                                                                                                                                                                                                                                        |  |

**Please place an “X” next to the following statement to indicate your agreement:**

☒ I certify that I have answered every question and have not altered the wording of any of the questions on this form.

## ICMJE DISCLOSURE FORM

**Date:** 12/9/2021

**Your Name:** Melanie Kail

**Manuscript Title:** Clonal Hematopoiesis in Sickle Cell Disease

**Manuscript Number (if known):** 156060-JCI-CMED-RV-2

In the interest of transparency, we ask you to disclose all relationships/activities/interests listed below that are related to the content of your manuscript. "Related" means any relation with for-profit or not-for-profit third parties whose interests may be affected by the content of the manuscript. Disclosure represents a commitment to transparency and does not necessarily indicate a bias. If you are in doubt about whether to list a relationship/activity/interest, it is preferable that you do so.

The author's relationships/activities/interests should be defined broadly. For example, if your manuscript pertains to the epidemiology of hypertension, you should declare all relationships with manufacturers of antihypertensive medication, even if that medication is not mentioned in the manuscript.

In item #1 below, report all support for the work reported in this manuscript without time limit. For all other items, the time frame for disclosure is the past 36 months.

|                                                           |                                                                                                                                                                                | Name all entities with whom you have this relationship or indicate none (add rows as needed)                                                                                                                                                                                                                                                                                                                                                                                                                                                                                                                                  | Specifications/Comments (e.g., if payments were made to you or to your institution) |                                                 |                                              |                                  |                                                      |                                           |  |
|-----------------------------------------------------------|--------------------------------------------------------------------------------------------------------------------------------------------------------------------------------|-------------------------------------------------------------------------------------------------------------------------------------------------------------------------------------------------------------------------------------------------------------------------------------------------------------------------------------------------------------------------------------------------------------------------------------------------------------------------------------------------------------------------------------------------------------------------------------------------------------------------------|-------------------------------------------------------------------------------------|-------------------------------------------------|----------------------------------------------|----------------------------------|------------------------------------------------------|-------------------------------------------|--|
| <b>Time frame: Since the initial planning of the work</b> |                                                                                                                                                                                |                                                                                                                                                                                                                                                                                                                                                                                                                                                                                                                                                                                                                               |                                                                                     |                                                 |                                              |                                  |                                                      |                                           |  |
| 1                                                         | All support for the present manuscript (e.g., funding, provision of study materials, medical writing, article processing charges, etc.)<br><b>No time limit for this item.</b> | <div style="margin-bottom: 10px;"> <input type="checkbox"/> <b>None</b> </div> <table border="1" style="width: 100%; border-collapse: collapse;"> <tr> <td style="width: 60%; padding: 2px;">NIH NHLBI R01HL68959, HL79915, HL70769, HL87681</td> <td style="padding: 2px;">Grant funding used to collect OMG-SCD cohort</td> </tr> <tr> <td style="padding: 2px;">Doris Duke Charitable Foundation</td> <td style="padding: 2px;">Grant funding used to support work on the manuscript</td> </tr> <tr> <td colspan="2" style="padding: 2px; font-size: small;">Click the tab key to add additional rows.</td> </tr> </table> |                                                                                     | NIH NHLBI R01HL68959, HL79915, HL70769, HL87681 | Grant funding used to collect OMG-SCD cohort | Doris Duke Charitable Foundation | Grant funding used to support work on the manuscript | Click the tab key to add additional rows. |  |
| NIH NHLBI R01HL68959, HL79915, HL70769, HL87681           | Grant funding used to collect OMG-SCD cohort                                                                                                                                   |                                                                                                                                                                                                                                                                                                                                                                                                                                                                                                                                                                                                                               |                                                                                     |                                                 |                                              |                                  |                                                      |                                           |  |
| Doris Duke Charitable Foundation                          | Grant funding used to support work on the manuscript                                                                                                                           |                                                                                                                                                                                                                                                                                                                                                                                                                                                                                                                                                                                                                               |                                                                                     |                                                 |                                              |                                  |                                                      |                                           |  |
| Click the tab key to add additional rows.                 |                                                                                                                                                                                |                                                                                                                                                                                                                                                                                                                                                                                                                                                                                                                                                                                                                               |                                                                                     |                                                 |                                              |                                  |                                                      |                                           |  |
| <b>Time frame: past 36 months</b>                         |                                                                                                                                                                                |                                                                                                                                                                                                                                                                                                                                                                                                                                                                                                                                                                                                                               |                                                                                     |                                                 |                                              |                                  |                                                      |                                           |  |
| 2                                                         | Grants or contracts from any entity (if not indicated in item #1 above).                                                                                                       | <div style="margin-bottom: 10px;"> <input checked="" type="checkbox"/> <b>None</b> </div> <table border="1" style="width: 100%; border-collapse: collapse;"> <tr><td style="width: 60%; height: 20px;"></td><td></td></tr> <tr><td style="height: 20px;"></td><td></td></tr> <tr><td style="height: 20px;"></td><td></td></tr> </table>                                                                                                                                                                                                                                                                                       |                                                                                     |                                                 |                                              |                                  |                                                      |                                           |  |
|                                                           |                                                                                                                                                                                |                                                                                                                                                                                                                                                                                                                                                                                                                                                                                                                                                                                                                               |                                                                                     |                                                 |                                              |                                  |                                                      |                                           |  |
|                                                           |                                                                                                                                                                                |                                                                                                                                                                                                                                                                                                                                                                                                                                                                                                                                                                                                                               |                                                                                     |                                                 |                                              |                                  |                                                      |                                           |  |
|                                                           |                                                                                                                                                                                |                                                                                                                                                                                                                                                                                                                                                                                                                                                                                                                                                                                                                               |                                                                                     |                                                 |                                              |                                  |                                                      |                                           |  |
| 3                                                         | Royalties or licenses                                                                                                                                                          | <div style="margin-bottom: 10px;"> <input checked="" type="checkbox"/> <b>None</b> </div> <table border="1" style="width: 100%; border-collapse: collapse;"> <tr><td style="width: 60%; height: 20px;"></td><td></td></tr> <tr><td style="height: 20px;"></td><td></td></tr> <tr><td style="height: 20px;"></td><td></td></tr> </table>                                                                                                                                                                                                                                                                                       |                                                                                     |                                                 |                                              |                                  |                                                      |                                           |  |
|                                                           |                                                                                                                                                                                |                                                                                                                                                                                                                                                                                                                                                                                                                                                                                                                                                                                                                               |                                                                                     |                                                 |                                              |                                  |                                                      |                                           |  |
|                                                           |                                                                                                                                                                                |                                                                                                                                                                                                                                                                                                                                                                                                                                                                                                                                                                                                                               |                                                                                     |                                                 |                                              |                                  |                                                      |                                           |  |
|                                                           |                                                                                                                                                                                |                                                                                                                                                                                                                                                                                                                                                                                                                                                                                                                                                                                                                               |                                                                                     |                                                 |                                              |                                  |                                                      |                                           |  |

|                               |                                                                                                              |                                                                                                                                                                                                                                  |                               |        |                            |        |  |  |  |  |
|-------------------------------|--------------------------------------------------------------------------------------------------------------|----------------------------------------------------------------------------------------------------------------------------------------------------------------------------------------------------------------------------------|-------------------------------|--------|----------------------------|--------|--|--|--|--|
| 4                             | Consulting fees                                                                                              | <input checked="" type="checkbox"/> <b>None</b> <table border="1"> <tr><td></td><td></td></tr> <tr><td></td><td></td></tr> <tr><td></td><td></td></tr> <tr><td></td><td></td></tr> </table>                                      |                               |        |                            |        |  |  |  |  |
|                               |                                                                                                              |                                                                                                                                                                                                                                  |                               |        |                            |        |  |  |  |  |
|                               |                                                                                                              |                                                                                                                                                                                                                                  |                               |        |                            |        |  |  |  |  |
|                               |                                                                                                              |                                                                                                                                                                                                                                  |                               |        |                            |        |  |  |  |  |
|                               |                                                                                                              |                                                                                                                                                                                                                                  |                               |        |                            |        |  |  |  |  |
| 5                             | Payment or honoraria for lectures, presentations, speakers bureaus, manuscript writing or educational events | <input checked="" type="checkbox"/> <b>None</b> <table border="1"> <tr><td></td><td></td></tr> <tr><td></td><td></td></tr> <tr><td></td><td></td></tr> </table>                                                                  |                               |        |                            |        |  |  |  |  |
|                               |                                                                                                              |                                                                                                                                                                                                                                  |                               |        |                            |        |  |  |  |  |
|                               |                                                                                                              |                                                                                                                                                                                                                                  |                               |        |                            |        |  |  |  |  |
|                               |                                                                                                              |                                                                                                                                                                                                                                  |                               |        |                            |        |  |  |  |  |
| 6                             | Payment for expert testimony                                                                                 | <input checked="" type="checkbox"/> <b>None</b> <table border="1"> <tr><td></td><td></td></tr> <tr><td></td><td></td></tr> <tr><td></td><td></td></tr> </table>                                                                  |                               |        |                            |        |  |  |  |  |
|                               |                                                                                                              |                                                                                                                                                                                                                                  |                               |        |                            |        |  |  |  |  |
|                               |                                                                                                              |                                                                                                                                                                                                                                  |                               |        |                            |        |  |  |  |  |
|                               |                                                                                                              |                                                                                                                                                                                                                                  |                               |        |                            |        |  |  |  |  |
| 7                             | Support for attending meetings and/or travel                                                                 | <input checked="" type="checkbox"/> <b>None</b> <table border="1"> <tr><td></td><td></td></tr> <tr><td></td><td></td></tr> <tr><td></td><td></td></tr> </table>                                                                  |                               |        |                            |        |  |  |  |  |
|                               |                                                                                                              |                                                                                                                                                                                                                                  |                               |        |                            |        |  |  |  |  |
|                               |                                                                                                              |                                                                                                                                                                                                                                  |                               |        |                            |        |  |  |  |  |
|                               |                                                                                                              |                                                                                                                                                                                                                                  |                               |        |                            |        |  |  |  |  |
| 8                             | Patents planned, issued or pending                                                                           | <input checked="" type="checkbox"/> <b>None</b> <table border="1"> <tr><td></td><td></td></tr> <tr><td></td><td></td></tr> <tr><td></td><td></td></tr> </table>                                                                  |                               |        |                            |        |  |  |  |  |
|                               |                                                                                                              |                                                                                                                                                                                                                                  |                               |        |                            |        |  |  |  |  |
|                               |                                                                                                              |                                                                                                                                                                                                                                  |                               |        |                            |        |  |  |  |  |
|                               |                                                                                                              |                                                                                                                                                                                                                                  |                               |        |                            |        |  |  |  |  |
| 9                             | Participation on a Data Safety Monitoring Board or Advisory Board                                            | <input checked="" type="checkbox"/> <b>None</b> <table border="1"> <tr><td></td><td></td></tr> <tr><td></td><td></td></tr> <tr><td></td><td></td></tr> </table>                                                                  |                               |        |                            |        |  |  |  |  |
|                               |                                                                                                              |                                                                                                                                                                                                                                  |                               |        |                            |        |  |  |  |  |
|                               |                                                                                                              |                                                                                                                                                                                                                                  |                               |        |                            |        |  |  |  |  |
|                               |                                                                                                              |                                                                                                                                                                                                                                  |                               |        |                            |        |  |  |  |  |
| 10                            | Leadership or fiduciary role in other board, society, committee or                                           | <input type="checkbox"/> <b>None</b> <table border="1"> <tr> <td>TOPMed Sickle Cell Work Group</td> <td>unpaid</td> </tr> <tr> <td>TOPMed Executive Committee</td> <td>unpaid</td> </tr> <tr> <td></td> <td></td> </tr> </table> | TOPMed Sickle Cell Work Group | unpaid | TOPMed Executive Committee | unpaid |  |  |  |  |
| TOPMed Sickle Cell Work Group | unpaid                                                                                                       |                                                                                                                                                                                                                                  |                               |        |                            |        |  |  |  |  |
| TOPMed Executive Committee    | unpaid                                                                                                       |                                                                                                                                                                                                                                  |                               |        |                            |        |  |  |  |  |
|                               |                                                                                                              |                                                                                                                                                                                                                                  |                               |        |                            |        |  |  |  |  |

|                                                                                                                                                                                                                                                               |                                                                                                 |                                                 |  |
|---------------------------------------------------------------------------------------------------------------------------------------------------------------------------------------------------------------------------------------------------------------|-------------------------------------------------------------------------------------------------|-------------------------------------------------|--|
|                                                                                                                                                                                                                                                               | advocacy group,<br>paid or unpaid                                                               |                                                 |  |
| 11                                                                                                                                                                                                                                                            | Stock or stock<br>options                                                                       | <input checked="" type="checkbox"/> <b>None</b> |  |
|                                                                                                                                                                                                                                                               |                                                                                                 |                                                 |  |
|                                                                                                                                                                                                                                                               |                                                                                                 |                                                 |  |
|                                                                                                                                                                                                                                                               |                                                                                                 |                                                 |  |
| 12                                                                                                                                                                                                                                                            | Receipt of<br>equipment,<br>materials, drugs,<br>medical writing,<br>gifts or other<br>services | <input checked="" type="checkbox"/> <b>None</b> |  |
|                                                                                                                                                                                                                                                               |                                                                                                 |                                                 |  |
|                                                                                                                                                                                                                                                               |                                                                                                 |                                                 |  |
|                                                                                                                                                                                                                                                               |                                                                                                 |                                                 |  |
| 13                                                                                                                                                                                                                                                            | Other financial<br>or non-financial<br>interests                                                | <input checked="" type="checkbox"/> <b>None</b> |  |
|                                                                                                                                                                                                                                                               |                                                                                                 |                                                 |  |
|                                                                                                                                                                                                                                                               |                                                                                                 |                                                 |  |
|                                                                                                                                                                                                                                                               |                                                                                                 |                                                 |  |
| <p><b>Please place an "X" next to the following statement to indicate your agreement:</b></p> <p><input checked="" type="checkbox"/> I certify that I have answered every question and have not altered the wording of any of the questions on this form.</p> |                                                                                                 |                                                 |  |

## ICMJE DISCLOSURE FORM

**Date:** 12/9/2021

**Your Name:** Allison Ashley-Koch

**Manuscript Title:** Clonal Hematopoiesis in Sickle Cell Disease

**Manuscript Number (if known):** 156060-JCI-CMED-RV-2

In the interest of transparency, we ask you to disclose all relationships/activities/interests listed below that are related to the content of your manuscript. "Related" means any relation with for-profit or not-for-profit third parties whose interests may be affected by the content of the manuscript. Disclosure represents a commitment to transparency and does not necessarily indicate a bias. If you are in doubt about whether to list a relationship/activity/interest, it is preferable that you do so.

The author's relationships/activities/interests should be defined broadly. For example, if your manuscript pertains to the epidemiology of hypertension, you should declare all relationships with manufacturers of antihypertensive medication, even if that medication is not mentioned in the manuscript.

In item #1 below, report all support for the work reported in this manuscript without time limit. For all other items, the time frame for disclosure is the past 36 months.

|                                                           |                                                                                                                                                                                | Name all entities with whom you have this relationship or indicate none (add rows as needed)                                                                                                                                                                                                                                                                                                                                                                                                                                                                                                                                                   | Specifications/Comments (e.g., if payments were made to you or to your institution) |                                                 |                                              |                                  |                                                      |                                                          |  |
|-----------------------------------------------------------|--------------------------------------------------------------------------------------------------------------------------------------------------------------------------------|------------------------------------------------------------------------------------------------------------------------------------------------------------------------------------------------------------------------------------------------------------------------------------------------------------------------------------------------------------------------------------------------------------------------------------------------------------------------------------------------------------------------------------------------------------------------------------------------------------------------------------------------|-------------------------------------------------------------------------------------|-------------------------------------------------|----------------------------------------------|----------------------------------|------------------------------------------------------|----------------------------------------------------------|--|
| <b>Time frame: Since the initial planning of the work</b> |                                                                                                                                                                                |                                                                                                                                                                                                                                                                                                                                                                                                                                                                                                                                                                                                                                                |                                                                                     |                                                 |                                              |                                  |                                                      |                                                          |  |
| 1                                                         | All support for the present manuscript (e.g., funding, provision of study materials, medical writing, article processing charges, etc.)<br><b>No time limit for this item.</b> | <div style="margin-bottom: 10px;"> <input type="checkbox"/> <b>None</b> </div> <table border="1" style="width: 100%; border-collapse: collapse;"> <tr> <td style="width: 60%; padding: 2px;">NIH NHLBI R01HL68959, HL79915, HL70769, HL87681</td> <td style="padding: 2px;">Grant funding used to collect OMG-SCD cohort</td> </tr> <tr> <td style="padding: 2px;">Doris Duke Charitable Foundation</td> <td style="padding: 2px;">Grant funding used to support work on the manuscript</td> </tr> <tr> <td colspan="2" style="padding: 2px; text-align: center;"><small>Click the tab key to add additional rows.</small></td> </tr> </table> |                                                                                     | NIH NHLBI R01HL68959, HL79915, HL70769, HL87681 | Grant funding used to collect OMG-SCD cohort | Doris Duke Charitable Foundation | Grant funding used to support work on the manuscript | <small>Click the tab key to add additional rows.</small> |  |
| NIH NHLBI R01HL68959, HL79915, HL70769, HL87681           | Grant funding used to collect OMG-SCD cohort                                                                                                                                   |                                                                                                                                                                                                                                                                                                                                                                                                                                                                                                                                                                                                                                                |                                                                                     |                                                 |                                              |                                  |                                                      |                                                          |  |
| Doris Duke Charitable Foundation                          | Grant funding used to support work on the manuscript                                                                                                                           |                                                                                                                                                                                                                                                                                                                                                                                                                                                                                                                                                                                                                                                |                                                                                     |                                                 |                                              |                                  |                                                      |                                                          |  |
| <small>Click the tab key to add additional rows.</small>  |                                                                                                                                                                                |                                                                                                                                                                                                                                                                                                                                                                                                                                                                                                                                                                                                                                                |                                                                                     |                                                 |                                              |                                  |                                                      |                                                          |  |
| <b>Time frame: past 36 months</b>                         |                                                                                                                                                                                |                                                                                                                                                                                                                                                                                                                                                                                                                                                                                                                                                                                                                                                |                                                                                     |                                                 |                                              |                                  |                                                      |                                                          |  |
| 2                                                         | Grants or contracts from any entity (if not indicated in item #1 above).                                                                                                       | <div style="margin-bottom: 10px;"> <input checked="" type="checkbox"/> <b>None</b> </div> <table border="1" style="width: 100%; border-collapse: collapse;"> <tr><td style="width: 60%; height: 20px;"></td><td></td></tr> <tr><td style="height: 20px;"></td><td></td></tr> <tr><td style="height: 20px;"></td><td></td></tr> </table>                                                                                                                                                                                                                                                                                                        |                                                                                     |                                                 |                                              |                                  |                                                      |                                                          |  |
|                                                           |                                                                                                                                                                                |                                                                                                                                                                                                                                                                                                                                                                                                                                                                                                                                                                                                                                                |                                                                                     |                                                 |                                              |                                  |                                                      |                                                          |  |
|                                                           |                                                                                                                                                                                |                                                                                                                                                                                                                                                                                                                                                                                                                                                                                                                                                                                                                                                |                                                                                     |                                                 |                                              |                                  |                                                      |                                                          |  |
|                                                           |                                                                                                                                                                                |                                                                                                                                                                                                                                                                                                                                                                                                                                                                                                                                                                                                                                                |                                                                                     |                                                 |                                              |                                  |                                                      |                                                          |  |
| 3                                                         | Royalties or licenses                                                                                                                                                          | <div style="margin-bottom: 10px;"> <input checked="" type="checkbox"/> <b>None</b> </div> <table border="1" style="width: 100%; border-collapse: collapse;"> <tr><td style="width: 60%; height: 20px;"></td><td></td></tr> <tr><td style="height: 20px;"></td><td></td></tr> <tr><td style="height: 20px;"></td><td></td></tr> </table>                                                                                                                                                                                                                                                                                                        |                                                                                     |                                                 |                                              |                                  |                                                      |                                                          |  |
|                                                           |                                                                                                                                                                                |                                                                                                                                                                                                                                                                                                                                                                                                                                                                                                                                                                                                                                                |                                                                                     |                                                 |                                              |                                  |                                                      |                                                          |  |
|                                                           |                                                                                                                                                                                |                                                                                                                                                                                                                                                                                                                                                                                                                                                                                                                                                                                                                                                |                                                                                     |                                                 |                                              |                                  |                                                      |                                                          |  |
|                                                           |                                                                                                                                                                                |                                                                                                                                                                                                                                                                                                                                                                                                                                                                                                                                                                                                                                                |                                                                                     |                                                 |                                              |                                  |                                                      |                                                          |  |

|                               |                                                                                                              |                                                                                                                                                                                                                                                                 |                               |        |                            |        |  |  |  |  |
|-------------------------------|--------------------------------------------------------------------------------------------------------------|-----------------------------------------------------------------------------------------------------------------------------------------------------------------------------------------------------------------------------------------------------------------|-------------------------------|--------|----------------------------|--------|--|--|--|--|
| 4                             | Consulting fees                                                                                              | <input checked="" type="checkbox"/> <b>None</b> <table border="1" data-bbox="370 205 1507 342"> <tr><td></td><td></td></tr> <tr><td></td><td></td></tr> <tr><td></td><td></td></tr> <tr><td></td><td></td></tr> </table>                                        |                               |        |                            |        |  |  |  |  |
|                               |                                                                                                              |                                                                                                                                                                                                                                                                 |                               |        |                            |        |  |  |  |  |
|                               |                                                                                                              |                                                                                                                                                                                                                                                                 |                               |        |                            |        |  |  |  |  |
|                               |                                                                                                              |                                                                                                                                                                                                                                                                 |                               |        |                            |        |  |  |  |  |
|                               |                                                                                                              |                                                                                                                                                                                                                                                                 |                               |        |                            |        |  |  |  |  |
| 5                             | Payment or honoraria for lectures, presentations, speakers bureaus, manuscript writing or educational events | <input checked="" type="checkbox"/> <b>None</b> <table border="1" data-bbox="370 493 1507 596"> <tr><td></td><td></td></tr> <tr><td></td><td></td></tr> <tr><td></td><td></td></tr> </table>                                                                    |                               |        |                            |        |  |  |  |  |
|                               |                                                                                                              |                                                                                                                                                                                                                                                                 |                               |        |                            |        |  |  |  |  |
|                               |                                                                                                              |                                                                                                                                                                                                                                                                 |                               |        |                            |        |  |  |  |  |
|                               |                                                                                                              |                                                                                                                                                                                                                                                                 |                               |        |                            |        |  |  |  |  |
| 6                             | Payment for expert testimony                                                                                 | <input checked="" type="checkbox"/> <b>None</b> <table border="1" data-bbox="370 833 1507 936"> <tr><td></td><td></td></tr> <tr><td></td><td></td></tr> <tr><td></td><td></td></tr> </table>                                                                    |                               |        |                            |        |  |  |  |  |
|                               |                                                                                                              |                                                                                                                                                                                                                                                                 |                               |        |                            |        |  |  |  |  |
|                               |                                                                                                              |                                                                                                                                                                                                                                                                 |                               |        |                            |        |  |  |  |  |
|                               |                                                                                                              |                                                                                                                                                                                                                                                                 |                               |        |                            |        |  |  |  |  |
| 7                             | Support for attending meetings and/or travel                                                                 | <input checked="" type="checkbox"/> <b>None</b> <table border="1" data-bbox="370 1089 1507 1192"> <tr><td></td><td></td></tr> <tr><td></td><td></td></tr> <tr><td></td><td></td></tr> </table>                                                                  |                               |        |                            |        |  |  |  |  |
|                               |                                                                                                              |                                                                                                                                                                                                                                                                 |                               |        |                            |        |  |  |  |  |
|                               |                                                                                                              |                                                                                                                                                                                                                                                                 |                               |        |                            |        |  |  |  |  |
|                               |                                                                                                              |                                                                                                                                                                                                                                                                 |                               |        |                            |        |  |  |  |  |
| 8                             | Patents planned, issued or pending                                                                           | <input checked="" type="checkbox"/> <b>None</b> <table border="1" data-bbox="370 1346 1507 1449"> <tr><td></td><td></td></tr> <tr><td></td><td></td></tr> <tr><td></td><td></td></tr> </table>                                                                  |                               |        |                            |        |  |  |  |  |
|                               |                                                                                                              |                                                                                                                                                                                                                                                                 |                               |        |                            |        |  |  |  |  |
|                               |                                                                                                              |                                                                                                                                                                                                                                                                 |                               |        |                            |        |  |  |  |  |
|                               |                                                                                                              |                                                                                                                                                                                                                                                                 |                               |        |                            |        |  |  |  |  |
| 9                             | Participation on a Data Safety Monitoring Board or Advisory Board                                            | <input checked="" type="checkbox"/> <b>None</b> <table border="1" data-bbox="370 1602 1507 1705"> <tr><td></td><td></td></tr> <tr><td></td><td></td></tr> <tr><td></td><td></td></tr> </table>                                                                  |                               |        |                            |        |  |  |  |  |
|                               |                                                                                                              |                                                                                                                                                                                                                                                                 |                               |        |                            |        |  |  |  |  |
|                               |                                                                                                              |                                                                                                                                                                                                                                                                 |                               |        |                            |        |  |  |  |  |
|                               |                                                                                                              |                                                                                                                                                                                                                                                                 |                               |        |                            |        |  |  |  |  |
| 10                            | Leadership or fiduciary role in other board, society, committee or                                           | <input type="checkbox"/> <b>None</b> <table border="1" data-bbox="370 1858 1507 1961"> <tr> <td>TOPMed Sickle Cell Work Group</td> <td>unpaid</td> </tr> <tr> <td>TOPMed Executive Committee</td> <td>unpaid</td> </tr> <tr> <td></td> <td></td> </tr> </table> | TOPMed Sickle Cell Work Group | unpaid | TOPMed Executive Committee | unpaid |  |  |  |  |
| TOPMed Sickle Cell Work Group | unpaid                                                                                                       |                                                                                                                                                                                                                                                                 |                               |        |                            |        |  |  |  |  |
| TOPMed Executive Committee    | unpaid                                                                                                       |                                                                                                                                                                                                                                                                 |                               |        |                            |        |  |  |  |  |
|                               |                                                                                                              |                                                                                                                                                                                                                                                                 |                               |        |                            |        |  |  |  |  |



|                                                                                                                                                                                                                                                               |                                                                                                 |                                                 |  |
|---------------------------------------------------------------------------------------------------------------------------------------------------------------------------------------------------------------------------------------------------------------|-------------------------------------------------------------------------------------------------|-------------------------------------------------|--|
|                                                                                                                                                                                                                                                               | advocacy group,<br>paid or unpaid                                                               |                                                 |  |
| 11                                                                                                                                                                                                                                                            | Stock or stock<br>options                                                                       | <input checked="" type="checkbox"/> <b>None</b> |  |
|                                                                                                                                                                                                                                                               |                                                                                                 |                                                 |  |
|                                                                                                                                                                                                                                                               |                                                                                                 |                                                 |  |
|                                                                                                                                                                                                                                                               |                                                                                                 |                                                 |  |
| 12                                                                                                                                                                                                                                                            | Receipt of<br>equipment,<br>materials, drugs,<br>medical writing,<br>gifts or other<br>services | <input checked="" type="checkbox"/> <b>None</b> |  |
|                                                                                                                                                                                                                                                               |                                                                                                 |                                                 |  |
|                                                                                                                                                                                                                                                               |                                                                                                 |                                                 |  |
|                                                                                                                                                                                                                                                               |                                                                                                 |                                                 |  |
| 13                                                                                                                                                                                                                                                            | Other financial<br>or non-financial<br>interests                                                | <input checked="" type="checkbox"/> <b>None</b> |  |
|                                                                                                                                                                                                                                                               |                                                                                                 |                                                 |  |
|                                                                                                                                                                                                                                                               |                                                                                                 |                                                 |  |
|                                                                                                                                                                                                                                                               |                                                                                                 |                                                 |  |
| <p><b>Please place an "X" next to the following statement to indicate your agreement:</b></p> <p><input checked="" type="checkbox"/> I certify that I have answered every question and have not altered the wording of any of the questions on this form.</p> |                                                                                                 |                                                 |  |

# ICMJE DISCLOSURE FORM

**Date:** 12/9/2021

**Your Name:** Marilyn J Telen

**Manuscript Title:** Clonal Hematopoiesis in Sickle Cell Disease

**Manuscript Number (if known):** 156060-JCI-CMED-RV-2

In the interest of transparency, we ask you to disclose all relationships/activities/interests listed below that are related to the content of your manuscript. "Related" means any relation with for-profit or not-for-profit third parties whose interests may be affected by the content of the manuscript. Disclosure represents a commitment to transparency and does not necessarily indicate a bias. If you are in doubt about whether to list a relationship/activity/interest, it is preferable that you do so.

The author's relationships/activities/interests should be defined broadly. For example, if your manuscript pertains to the epidemiology of hypertension, you should declare all relationships with manufacturers of antihypertensive medication, even if that medication is not mentioned in the manuscript.

In item #1 below, report all support for the work reported in this manuscript without time limit. For all other items, the time frame for disclosure is the past 36 months.

|                                                           | Name all entities with whom you have this relationship or indicate none (add rows as needed)                                                                                   | Specifications/Comments (e.g., if payments were made to you or to your institution)                                                                                                                                                                             |       |                                                         |  |  |  |                                           |
|-----------------------------------------------------------|--------------------------------------------------------------------------------------------------------------------------------------------------------------------------------|-----------------------------------------------------------------------------------------------------------------------------------------------------------------------------------------------------------------------------------------------------------------|-------|---------------------------------------------------------|--|--|--|-------------------------------------------|
| <b>Time frame: Since the initial planning of the work</b> |                                                                                                                                                                                |                                                                                                                                                                                                                                                                 |       |                                                         |  |  |  |                                           |
| <b>1</b>                                                  | All support for the present manuscript (e.g., funding, provision of study materials, medical writing, article processing charges, etc.)<br><b>No time limit for this item.</b> | <input type="checkbox"/> <b>None</b><br><table border="1"> <tr> <td>NHLBI</td><td>Original grant support for data and specimen collection</td></tr> <tr> <td></td><td></td></tr> <tr> <td></td><td>Click the tab key to add additional rows.</td></tr> </table> | NHLBI | Original grant support for data and specimen collection |  |  |  | Click the tab key to add additional rows. |
| NHLBI                                                     | Original grant support for data and specimen collection                                                                                                                        |                                                                                                                                                                                                                                                                 |       |                                                         |  |  |  |                                           |
|                                                           |                                                                                                                                                                                |                                                                                                                                                                                                                                                                 |       |                                                         |  |  |  |                                           |
|                                                           | Click the tab key to add additional rows.                                                                                                                                      |                                                                                                                                                                                                                                                                 |       |                                                         |  |  |  |                                           |
| <b>Time frame: past 36 months</b>                         |                                                                                                                                                                                |                                                                                                                                                                                                                                                                 |       |                                                         |  |  |  |                                           |
| <b>2</b>                                                  | Grants or contracts from any entity (if not indicated in item #1 above).                                                                                                       | <input checked="" type="checkbox"/> <b>None</b><br><table border="1"> <tr><td></td><td></td></tr> <tr><td></td><td></td></tr> <tr><td></td><td></td></tr> </table>                                                                                              |       |                                                         |  |  |  |                                           |
|                                                           |                                                                                                                                                                                |                                                                                                                                                                                                                                                                 |       |                                                         |  |  |  |                                           |
|                                                           |                                                                                                                                                                                |                                                                                                                                                                                                                                                                 |       |                                                         |  |  |  |                                           |
|                                                           |                                                                                                                                                                                |                                                                                                                                                                                                                                                                 |       |                                                         |  |  |  |                                           |
| <b>3</b>                                                  | Royalties or licenses                                                                                                                                                          | <input checked="" type="checkbox"/> <b>None</b><br><table border="1"> <tr><td></td><td></td></tr> <tr><td></td><td></td></tr> <tr><td></td><td></td></tr> </table>                                                                                              |       |                                                         |  |  |  |                                           |
|                                                           |                                                                                                                                                                                |                                                                                                                                                                                                                                                                 |       |                                                         |  |  |  |                                           |
|                                                           |                                                                                                                                                                                |                                                                                                                                                                                                                                                                 |       |                                                         |  |  |  |                                           |
|                                                           |                                                                                                                                                                                |                                                                                                                                                                                                                                                                 |       |                                                         |  |  |  |                                           |

|    |                                                                                                              | Name all entities with whom you have this relationship or indicate none (add rows as needed)                                                                                                   | Specifications/Comments (e.g., if payments were made to you or to your institution) |  |  |  |  |  |  |  |  |
|----|--------------------------------------------------------------------------------------------------------------|------------------------------------------------------------------------------------------------------------------------------------------------------------------------------------------------|-------------------------------------------------------------------------------------|--|--|--|--|--|--|--|--|
| 4  | Consulting fees                                                                                              | <input checked="" type="checkbox"/> <b>None</b><br><table border="1"> <tr><td></td><td></td></tr> <tr><td></td><td></td></tr> <tr><td></td><td></td></tr> <tr><td></td><td></td></tr> </table> |                                                                                     |  |  |  |  |  |  |  |  |
|    |                                                                                                              |                                                                                                                                                                                                |                                                                                     |  |  |  |  |  |  |  |  |
|    |                                                                                                              |                                                                                                                                                                                                |                                                                                     |  |  |  |  |  |  |  |  |
|    |                                                                                                              |                                                                                                                                                                                                |                                                                                     |  |  |  |  |  |  |  |  |
|    |                                                                                                              |                                                                                                                                                                                                |                                                                                     |  |  |  |  |  |  |  |  |
| 5  | Payment or honoraria for lectures, presentations, speakers bureaus, manuscript writing or educational events | <input checked="" type="checkbox"/> <b>None</b><br><table border="1"> <tr><td></td><td></td></tr> <tr><td></td><td></td></tr> <tr><td></td><td></td></tr> </table>                             |                                                                                     |  |  |  |  |  |  |  |  |
|    |                                                                                                              |                                                                                                                                                                                                |                                                                                     |  |  |  |  |  |  |  |  |
|    |                                                                                                              |                                                                                                                                                                                                |                                                                                     |  |  |  |  |  |  |  |  |
|    |                                                                                                              |                                                                                                                                                                                                |                                                                                     |  |  |  |  |  |  |  |  |
| 6  | Payment for expert testimony                                                                                 | <input checked="" type="checkbox"/> <b>None</b><br><table border="1"> <tr><td></td><td></td></tr> <tr><td></td><td></td></tr> <tr><td></td><td></td></tr> </table>                             |                                                                                     |  |  |  |  |  |  |  |  |
|    |                                                                                                              |                                                                                                                                                                                                |                                                                                     |  |  |  |  |  |  |  |  |
|    |                                                                                                              |                                                                                                                                                                                                |                                                                                     |  |  |  |  |  |  |  |  |
|    |                                                                                                              |                                                                                                                                                                                                |                                                                                     |  |  |  |  |  |  |  |  |
| 7  | Support for attending meetings and/or travel                                                                 | <input checked="" type="checkbox"/> <b>None</b><br><table border="1"> <tr><td></td><td></td></tr> <tr><td></td><td></td></tr> <tr><td></td><td></td></tr> </table>                             |                                                                                     |  |  |  |  |  |  |  |  |
|    |                                                                                                              |                                                                                                                                                                                                |                                                                                     |  |  |  |  |  |  |  |  |
|    |                                                                                                              |                                                                                                                                                                                                |                                                                                     |  |  |  |  |  |  |  |  |
|    |                                                                                                              |                                                                                                                                                                                                |                                                                                     |  |  |  |  |  |  |  |  |
| 8  | Patents planned, issued or pending                                                                           | <input checked="" type="checkbox"/> <b>None</b><br><table border="1"> <tr><td></td><td></td></tr> <tr><td></td><td></td></tr> <tr><td></td><td></td></tr> </table>                             |                                                                                     |  |  |  |  |  |  |  |  |
|    |                                                                                                              |                                                                                                                                                                                                |                                                                                     |  |  |  |  |  |  |  |  |
|    |                                                                                                              |                                                                                                                                                                                                |                                                                                     |  |  |  |  |  |  |  |  |
|    |                                                                                                              |                                                                                                                                                                                                |                                                                                     |  |  |  |  |  |  |  |  |
| 9  | Participation on a Data Safety Monitoring Board or Advisory Board                                            | <input checked="" type="checkbox"/> <b>None</b><br><table border="1"> <tr><td></td><td></td></tr> <tr><td></td><td></td></tr> <tr><td></td><td></td></tr> </table>                             |                                                                                     |  |  |  |  |  |  |  |  |
|    |                                                                                                              |                                                                                                                                                                                                |                                                                                     |  |  |  |  |  |  |  |  |
|    |                                                                                                              |                                                                                                                                                                                                |                                                                                     |  |  |  |  |  |  |  |  |
|    |                                                                                                              |                                                                                                                                                                                                |                                                                                     |  |  |  |  |  |  |  |  |
| 10 | Leadership or fiduciary role in other board, society, committee or advocacy group, paid or unpaid            | <input checked="" type="checkbox"/> <b>None</b><br><table border="1"> <tr><td></td><td></td></tr> <tr><td></td><td></td></tr> <tr><td></td><td></td></tr> </table>                             |                                                                                     |  |  |  |  |  |  |  |  |
|    |                                                                                                              |                                                                                                                                                                                                |                                                                                     |  |  |  |  |  |  |  |  |
|    |                                                                                                              |                                                                                                                                                                                                |                                                                                     |  |  |  |  |  |  |  |  |
|    |                                                                                                              |                                                                                                                                                                                                |                                                                                     |  |  |  |  |  |  |  |  |

|                                                                         |                                                                                                   | Name all entities with whom you have this relationship or indicate none (add rows as needed)                                                                                                                                                                                                                                                                 | Specifications/Comments (e.g., if payments were made to you or to your institution) |                                                                         |                                                                                                   |  |  |  |  |
|-------------------------------------------------------------------------|---------------------------------------------------------------------------------------------------|--------------------------------------------------------------------------------------------------------------------------------------------------------------------------------------------------------------------------------------------------------------------------------------------------------------------------------------------------------------|-------------------------------------------------------------------------------------|-------------------------------------------------------------------------|---------------------------------------------------------------------------------------------------|--|--|--|--|
| 11                                                                      | Stock or stock options                                                                            | <input checked="" type="checkbox"/> <b>None</b> <table border="1" data-bbox="383 258 1516 359"> <tr><td></td><td></td></tr> <tr><td></td><td></td></tr> <tr><td></td><td></td></tr> </table>                                                                                                                                                                 |                                                                                     |                                                                         |                                                                                                   |  |  |  |  |
|                                                                         |                                                                                                   |                                                                                                                                                                                                                                                                                                                                                              |                                                                                     |                                                                         |                                                                                                   |  |  |  |  |
|                                                                         |                                                                                                   |                                                                                                                                                                                                                                                                                                                                                              |                                                                                     |                                                                         |                                                                                                   |  |  |  |  |
|                                                                         |                                                                                                   |                                                                                                                                                                                                                                                                                                                                                              |                                                                                     |                                                                         |                                                                                                   |  |  |  |  |
| 12                                                                      | Receipt of equipment, materials, drugs, medical writing, gifts or other services                  | <input checked="" type="checkbox"/> <b>None</b> <table border="1" data-bbox="383 476 1516 577"> <tr><td></td><td></td></tr> <tr><td></td><td></td></tr> <tr><td></td><td></td></tr> </table>                                                                                                                                                                 |                                                                                     |                                                                         |                                                                                                   |  |  |  |  |
|                                                                         |                                                                                                   |                                                                                                                                                                                                                                                                                                                                                              |                                                                                     |                                                                         |                                                                                                   |  |  |  |  |
|                                                                         |                                                                                                   |                                                                                                                                                                                                                                                                                                                                                              |                                                                                     |                                                                         |                                                                                                   |  |  |  |  |
|                                                                         |                                                                                                   |                                                                                                                                                                                                                                                                                                                                                              |                                                                                     |                                                                         |                                                                                                   |  |  |  |  |
| 13                                                                      | Other financial or non-financial interests                                                        | <input type="checkbox"/> <b>None</b> <table border="1" data-bbox="383 690 1516 825"> <tr> <td>I serve on the Executive Committee of the NIH CureSickleCell Initiative</td> <td>Unpaid position, but this work is of particular interest to investigators in gene therapy for SCD</td> </tr> <tr><td></td><td></td></tr> <tr><td></td><td></td></tr> </table> |                                                                                     | I serve on the Executive Committee of the NIH CureSickleCell Initiative | Unpaid position, but this work is of particular interest to investigators in gene therapy for SCD |  |  |  |  |
| I serve on the Executive Committee of the NIH CureSickleCell Initiative | Unpaid position, but this work is of particular interest to investigators in gene therapy for SCD |                                                                                                                                                                                                                                                                                                                                                              |                                                                                     |                                                                         |                                                                                                   |  |  |  |  |
|                                                                         |                                                                                                   |                                                                                                                                                                                                                                                                                                                                                              |                                                                                     |                                                                         |                                                                                                   |  |  |  |  |
|                                                                         |                                                                                                   |                                                                                                                                                                                                                                                                                                                                                              |                                                                                     |                                                                         |                                                                                                   |  |  |  |  |

**Please place an "X" next to the following statement to indicate your agreement:**

☒ I certify that I have answered every question and have not altered the wording of any of the questions on this form.

## ICMJE DISCLOSURE FORM

**Date:** 12/10/2021

**Your Name:** Brian Custer

**Manuscript Title:** Clonal Hematopoiesis in Sickle Cell Disease

**Manuscript Number (if known):** 156060-JCI-CMED-RV-2

In the interest of transparency, we ask you to disclose all relationships/activities/interests listed below that are related to the content of your manuscript. "Related" means any relation with for-profit or not-for-profit third parties whose interests may be affected by the content of the manuscript. Disclosure represents a commitment to transparency and does not necessarily indicate a bias. If you are in doubt about whether to list a relationship/activity/interest, it is preferable that you do so.

The author's relationships/activities/interests should be defined broadly. For example, if your manuscript pertains to the epidemiology of hypertension, you should declare all relationships with manufacturers of antihypertensive medication, even if that medication is not mentioned in the manuscript.

In item #1 below, report all support for the work reported in this manuscript without time limit. For all other items, the time frame for disclosure is the past 36 months.

|                                                           |                                                                                                                                                                                | Name all entities with whom you have this relationship or indicate none (add rows as needed)                                                                                                                                                                                                                                                                                                                                                                                         | Specifications/Comments (e.g., if payments were made to you or to your institution) |       |                   |  |  |  |                                           |
|-----------------------------------------------------------|--------------------------------------------------------------------------------------------------------------------------------------------------------------------------------|--------------------------------------------------------------------------------------------------------------------------------------------------------------------------------------------------------------------------------------------------------------------------------------------------------------------------------------------------------------------------------------------------------------------------------------------------------------------------------------|-------------------------------------------------------------------------------------|-------|-------------------|--|--|--|-------------------------------------------|
| <b>Time frame: Since the initial planning of the work</b> |                                                                                                                                                                                |                                                                                                                                                                                                                                                                                                                                                                                                                                                                                      |                                                                                     |       |                   |  |  |  |                                           |
| 1                                                         | All support for the present manuscript (e.g., funding, provision of study materials, medical writing, article processing charges, etc.)<br><b>No time limit for this item.</b> | <div style="margin-bottom: 10px;"> <input type="checkbox"/> <b>None</b> </div> <table border="1" style="width: 100%; border-collapse: collapse;"> <tr> <td style="width: 50%; padding: 2px;">NHLBI</td> <td style="width: 50%; padding: 2px;">To my institution</td> </tr> <tr> <td style="height: 20px;"></td> <td></td> </tr> <tr> <td style="height: 20px;"></td> <td style="text-align: center; font-size: 0.8em;">Click the tab key to add additional rows.</td> </tr> </table> |                                                                                     | NHLBI | To my institution |  |  |  | Click the tab key to add additional rows. |
| NHLBI                                                     | To my institution                                                                                                                                                              |                                                                                                                                                                                                                                                                                                                                                                                                                                                                                      |                                                                                     |       |                   |  |  |  |                                           |
|                                                           |                                                                                                                                                                                |                                                                                                                                                                                                                                                                                                                                                                                                                                                                                      |                                                                                     |       |                   |  |  |  |                                           |
|                                                           | Click the tab key to add additional rows.                                                                                                                                      |                                                                                                                                                                                                                                                                                                                                                                                                                                                                                      |                                                                                     |       |                   |  |  |  |                                           |
| <b>Time frame: past 36 months</b>                         |                                                                                                                                                                                |                                                                                                                                                                                                                                                                                                                                                                                                                                                                                      |                                                                                     |       |                   |  |  |  |                                           |
| 2                                                         | Grants or contracts from any entity (if not indicated in item #1 above).                                                                                                       | <div style="margin-bottom: 10px;"> <input checked="" type="checkbox"/> <b>None</b> </div> <table border="1" style="width: 100%; border-collapse: collapse;"> <tr><td style="height: 20px;"></td><td></td></tr> <tr><td style="height: 20px;"></td><td></td></tr> <tr><td style="height: 20px;"></td><td></td></tr> </table>                                                                                                                                                          |                                                                                     |       |                   |  |  |  |                                           |
|                                                           |                                                                                                                                                                                |                                                                                                                                                                                                                                                                                                                                                                                                                                                                                      |                                                                                     |       |                   |  |  |  |                                           |
|                                                           |                                                                                                                                                                                |                                                                                                                                                                                                                                                                                                                                                                                                                                                                                      |                                                                                     |       |                   |  |  |  |                                           |
|                                                           |                                                                                                                                                                                |                                                                                                                                                                                                                                                                                                                                                                                                                                                                                      |                                                                                     |       |                   |  |  |  |                                           |
| 3                                                         | Royalties or licenses                                                                                                                                                          | <div style="margin-bottom: 10px;"> <input checked="" type="checkbox"/> <b>None</b> </div> <table border="1" style="width: 100%; border-collapse: collapse;"> <tr><td style="height: 20px;"></td><td></td></tr> <tr><td style="height: 20px;"></td><td></td></tr> <tr><td style="height: 20px;"></td><td></td></tr> </table>                                                                                                                                                          |                                                                                     |       |                   |  |  |  |                                           |
|                                                           |                                                                                                                                                                                |                                                                                                                                                                                                                                                                                                                                                                                                                                                                                      |                                                                                     |       |                   |  |  |  |                                           |
|                                                           |                                                                                                                                                                                |                                                                                                                                                                                                                                                                                                                                                                                                                                                                                      |                                                                                     |       |                   |  |  |  |                                           |
|                                                           |                                                                                                                                                                                |                                                                                                                                                                                                                                                                                                                                                                                                                                                                                      |                                                                                     |       |                   |  |  |  |                                           |

|    |                                                                                                              |                                                                                                                                                                                                                          |  |  |  |  |  |  |  |  |
|----|--------------------------------------------------------------------------------------------------------------|--------------------------------------------------------------------------------------------------------------------------------------------------------------------------------------------------------------------------|--|--|--|--|--|--|--|--|
| 4  | Consulting fees                                                                                              | <input checked="" type="checkbox"/> <b>None</b> <table border="1" data-bbox="370 205 1507 342"> <tr><td></td><td></td></tr> <tr><td></td><td></td></tr> <tr><td></td><td></td></tr> <tr><td></td><td></td></tr> </table> |  |  |  |  |  |  |  |  |
|    |                                                                                                              |                                                                                                                                                                                                                          |  |  |  |  |  |  |  |  |
|    |                                                                                                              |                                                                                                                                                                                                                          |  |  |  |  |  |  |  |  |
|    |                                                                                                              |                                                                                                                                                                                                                          |  |  |  |  |  |  |  |  |
|    |                                                                                                              |                                                                                                                                                                                                                          |  |  |  |  |  |  |  |  |
| 5  | Payment or honoraria for lectures, presentations, speakers bureaus, manuscript writing or educational events | <input checked="" type="checkbox"/> <b>None</b> <table border="1" data-bbox="370 493 1507 596"> <tr><td></td><td></td></tr> <tr><td></td><td></td></tr> <tr><td></td><td></td></tr> </table>                             |  |  |  |  |  |  |  |  |
|    |                                                                                                              |                                                                                                                                                                                                                          |  |  |  |  |  |  |  |  |
|    |                                                                                                              |                                                                                                                                                                                                                          |  |  |  |  |  |  |  |  |
|    |                                                                                                              |                                                                                                                                                                                                                          |  |  |  |  |  |  |  |  |
| 6  | Payment for expert testimony                                                                                 | <input checked="" type="checkbox"/> <b>None</b> <table border="1" data-bbox="370 833 1507 936"> <tr><td></td><td></td></tr> <tr><td></td><td></td></tr> <tr><td></td><td></td></tr> </table>                             |  |  |  |  |  |  |  |  |
|    |                                                                                                              |                                                                                                                                                                                                                          |  |  |  |  |  |  |  |  |
|    |                                                                                                              |                                                                                                                                                                                                                          |  |  |  |  |  |  |  |  |
|    |                                                                                                              |                                                                                                                                                                                                                          |  |  |  |  |  |  |  |  |
| 7  | Support for attending meetings and/or travel                                                                 | <input checked="" type="checkbox"/> <b>None</b> <table border="1" data-bbox="370 1089 1507 1192"> <tr><td></td><td></td></tr> <tr><td></td><td></td></tr> <tr><td></td><td></td></tr> </table>                           |  |  |  |  |  |  |  |  |
|    |                                                                                                              |                                                                                                                                                                                                                          |  |  |  |  |  |  |  |  |
|    |                                                                                                              |                                                                                                                                                                                                                          |  |  |  |  |  |  |  |  |
|    |                                                                                                              |                                                                                                                                                                                                                          |  |  |  |  |  |  |  |  |
| 8  | Patents planned, issued or pending                                                                           | <input checked="" type="checkbox"/> <b>None</b> <table border="1" data-bbox="370 1346 1507 1449"> <tr><td></td><td></td></tr> <tr><td></td><td></td></tr> <tr><td></td><td></td></tr> </table>                           |  |  |  |  |  |  |  |  |
|    |                                                                                                              |                                                                                                                                                                                                                          |  |  |  |  |  |  |  |  |
|    |                                                                                                              |                                                                                                                                                                                                                          |  |  |  |  |  |  |  |  |
|    |                                                                                                              |                                                                                                                                                                                                                          |  |  |  |  |  |  |  |  |
| 9  | Participation on a Data Safety Monitoring Board or Advisory Board                                            | <input checked="" type="checkbox"/> <b>None</b> <table border="1" data-bbox="370 1602 1507 1705"> <tr><td></td><td></td></tr> <tr><td></td><td></td></tr> <tr><td></td><td></td></tr> </table>                           |  |  |  |  |  |  |  |  |
|    |                                                                                                              |                                                                                                                                                                                                                          |  |  |  |  |  |  |  |  |
|    |                                                                                                              |                                                                                                                                                                                                                          |  |  |  |  |  |  |  |  |
|    |                                                                                                              |                                                                                                                                                                                                                          |  |  |  |  |  |  |  |  |
| 10 | Leadership or fiduciary role in other board, society, committee or                                           | <input checked="" type="checkbox"/> <b>None</b> <table border="1" data-bbox="370 1858 1507 1961"> <tr><td></td><td></td></tr> <tr><td></td><td></td></tr> <tr><td></td><td></td></tr> </table>                           |  |  |  |  |  |  |  |  |
|    |                                                                                                              |                                                                                                                                                                                                                          |  |  |  |  |  |  |  |  |
|    |                                                                                                              |                                                                                                                                                                                                                          |  |  |  |  |  |  |  |  |
|    |                                                                                                              |                                                                                                                                                                                                                          |  |  |  |  |  |  |  |  |

|                                                                                                                                                                                                                                                               |                                                                                                 |                                                 |  |
|---------------------------------------------------------------------------------------------------------------------------------------------------------------------------------------------------------------------------------------------------------------|-------------------------------------------------------------------------------------------------|-------------------------------------------------|--|
|                                                                                                                                                                                                                                                               | advocacy group,<br>paid or unpaid                                                               |                                                 |  |
| 11                                                                                                                                                                                                                                                            | Stock or stock<br>options                                                                       | <input checked="" type="checkbox"/> <b>None</b> |  |
|                                                                                                                                                                                                                                                               |                                                                                                 |                                                 |  |
|                                                                                                                                                                                                                                                               |                                                                                                 |                                                 |  |
|                                                                                                                                                                                                                                                               |                                                                                                 |                                                 |  |
| 12                                                                                                                                                                                                                                                            | Receipt of<br>equipment,<br>materials, drugs,<br>medical writing,<br>gifts or other<br>services | <input checked="" type="checkbox"/> <b>None</b> |  |
|                                                                                                                                                                                                                                                               |                                                                                                 |                                                 |  |
|                                                                                                                                                                                                                                                               |                                                                                                 |                                                 |  |
|                                                                                                                                                                                                                                                               |                                                                                                 |                                                 |  |
| 13                                                                                                                                                                                                                                                            | Other financial<br>or non-financial<br>interests                                                | <input checked="" type="checkbox"/> <b>None</b> |  |
|                                                                                                                                                                                                                                                               |                                                                                                 |                                                 |  |
|                                                                                                                                                                                                                                                               |                                                                                                 |                                                 |  |
|                                                                                                                                                                                                                                                               |                                                                                                 |                                                 |  |
| <p><b>Please place an "X" next to the following statement to indicate your agreement:</b></p> <p><input checked="" type="checkbox"/> I certify that I have answered every question and have not altered the wording of any of the questions on this form.</p> |                                                                                                 |                                                 |  |



# ICMJE DISCLOSURE FORM

Date: 12/9/2021

Your Name: Shannon Kelly

Manuscript Title: Clonal Hematopoiesis in Sickle Cell Disease

Manuscript Number (if known): 156060-JCI-CMED-RV-2

In the interest of transparency, we ask you to disclose all relationships/activities/interests listed below that are related to the content of your manuscript. "Related" means any relation with for-profit or not-for-profit third parties whose interests may be affected by the content of the manuscript. Disclosure represents a commitment to transparency and does not necessarily indicate a bias. If you are in doubt about whether to list a relationship/activity/interest, it is preferable that you do so.

The author's relationships/activities/interests should be defined broadly. For example, if your manuscript pertains to the epidemiology of hypertension, you should declare all relationships with manufacturers of antihypertensive medication, even if that medication is not mentioned in the manuscript.

In item #1 below, report all support for the work reported in this manuscript without time limit. For all other items, the time frame for disclosure is the past 36 months.

|                                                           | Name all entities with whom you have this relationship or indicate none (add rows as needed)                                                                                                                        | Specifications/Comments (e.g., if payments were made to you or to your institution)                                                                                                                           |
|-----------------------------------------------------------|---------------------------------------------------------------------------------------------------------------------------------------------------------------------------------------------------------------------|---------------------------------------------------------------------------------------------------------------------------------------------------------------------------------------------------------------|
| <b>Time frame: Since the initial planning of the work</b> |                                                                                                                                                                                                                     |                                                                                                                                                                                                               |
| 1                                                         | <input checked="" type="checkbox"/> None<br>All support for the present manuscript (e.g., funding, provision of study materials, medical writing, article processing charges, etc.)<br>No time limit for this item. | NO personal payments to me.<br>The cohort of individuals with sickle cell disease that I helped establish was funded by NHLBI - the Recipient Epidemiology & Donor Evaluation Study (REDS-III) 75N92019D00038 |
| <b>Time frame: past 36 months</b>                         |                                                                                                                                                                                                                     |                                                                                                                                                                                                               |
| 2                                                         | <input type="checkbox"/> None<br>Grants or contracts from any entity (if not indicated in item #1 above).                                                                                                           |                                                                                                                                                                                                               |
| 3                                                         | <input checked="" type="checkbox"/> None<br>Royalties or licenses                                                                                                                                                   |                                                                                                                                                                                                               |



|    |                                                                                                              | Name all entities with whom you have this relationship or indicate none (add rows as needed) | Specifications/Comments (e.g., if payments were made to you or to your institution) |
|----|--------------------------------------------------------------------------------------------------------------|----------------------------------------------------------------------------------------------|-------------------------------------------------------------------------------------|
| 4  | Consulting fees                                                                                              | <input checked="" type="checkbox"/> None                                                     |                                                                                     |
|    |                                                                                                              |                                                                                              |                                                                                     |
|    |                                                                                                              |                                                                                              |                                                                                     |
|    |                                                                                                              |                                                                                              |                                                                                     |
| 5  | Payment or honoraria for lectures, presentations, speakers bureaus, manuscript writing or educational events | <input checked="" type="checkbox"/> None                                                     |                                                                                     |
|    |                                                                                                              |                                                                                              |                                                                                     |
|    |                                                                                                              |                                                                                              |                                                                                     |
|    |                                                                                                              |                                                                                              |                                                                                     |
| 6  | Payment for expert testimony                                                                                 | <input checked="" type="checkbox"/> None                                                     |                                                                                     |
|    |                                                                                                              |                                                                                              |                                                                                     |
|    |                                                                                                              |                                                                                              |                                                                                     |
|    |                                                                                                              |                                                                                              |                                                                                     |
| 7  | Support for attending meetings and/or travel                                                                 | <input checked="" type="checkbox"/> None                                                     |                                                                                     |
|    |                                                                                                              |                                                                                              |                                                                                     |
|    |                                                                                                              |                                                                                              |                                                                                     |
|    |                                                                                                              |                                                                                              |                                                                                     |
| 8  | Patents planned, issued or pending                                                                           | <input checked="" type="checkbox"/> None                                                     |                                                                                     |
|    |                                                                                                              |                                                                                              |                                                                                     |
|    |                                                                                                              |                                                                                              |                                                                                     |
|    |                                                                                                              |                                                                                              |                                                                                     |
| 9  | Participation on a Data Safety Monitoring Board or Advisory Board                                            | <input checked="" type="checkbox"/> None                                                     |                                                                                     |
|    |                                                                                                              |                                                                                              |                                                                                     |
|    |                                                                                                              |                                                                                              |                                                                                     |
|    |                                                                                                              |                                                                                              |                                                                                     |
| 10 | Leadership or fiduciary role in other board, society, committee or advocacy group, paid or unpaid            | <input checked="" type="checkbox"/> None                                                     |                                                                                     |
|    |                                                                                                              |                                                                                              |                                                                                     |
|    |                                                                                                              |                                                                                              |                                                                                     |
|    |                                                                                                              |                                                                                              |                                                                                     |



|                                                                                                                                                                                                                                                        |                                                                                  | Name all entities with whom you have this relationship or indicate none (add rows as needed) | Specifications/Comments (e.g., if payments were made to you or to your institution) |
|--------------------------------------------------------------------------------------------------------------------------------------------------------------------------------------------------------------------------------------------------------|----------------------------------------------------------------------------------|----------------------------------------------------------------------------------------------|-------------------------------------------------------------------------------------|
| 11                                                                                                                                                                                                                                                     | Stock or stock options                                                           | <input checked="" type="checkbox"/> None<br><div></div> <div></div> <div></div>              |                                                                                     |
| 12                                                                                                                                                                                                                                                     | Receipt of equipment, materials, drugs, medical writing, gifts or other services | <input checked="" type="checkbox"/> None<br><div></div> <div></div> <div></div>              |                                                                                     |
| 13                                                                                                                                                                                                                                                     | Other financial or non-financial interests                                       | <input checked="" type="checkbox"/> None<br><div></div> <div></div> <div></div>              |                                                                                     |
| <p>Please place an "X" next to the following statement to indicate your agreement:</p> <p><input checked="" type="checkbox"/> I certify that I have answered every question and have not altered the wording of any of the questions on this form.</p> |                                                                                  |                                                                                              |                                                                                     |



## ICMJE DISCLOSURE FORM

**Date:** 12/12/2021

**Your Name:** Carla Luana Dinardo

**Manuscript Title:** Clonal Hematopoiesis in Sickle Cell Disease

**Manuscript Number (if known):** 156060-JCI-CMED-RV-2

In the interest of transparency, we ask you to disclose all relationships/activities/interests listed below that are related to the content of your manuscript. "Related" means any relation with for-profit or not-for-profit third parties whose interests may be affected by the content of the manuscript. Disclosure represents a commitment to transparency and does not necessarily indicate a bias. If you are in doubt about whether to list a relationship/activity/interest, it is preferable that you do so.

The author's relationships/activities/interests should be defined broadly. For example, if your manuscript pertains to the epidemiology of hypertension, you should declare all relationships with manufacturers of antihypertensive medication, even if that medication is not mentioned in the manuscript.

In item #1 below, report all support for the work reported in this manuscript without time limit. For all other items, the time frame for disclosure is the past 36 months.

|                                                           | Name all entities with whom you have this relationship or indicate none (add rows as needed)                                                                                   | Specifications/Comments (e.g., if payments were made to you or to your institution)                                                                                                                                                                                                                                                                                                                                                                       |  |  |  |  |  |  |
|-----------------------------------------------------------|--------------------------------------------------------------------------------------------------------------------------------------------------------------------------------|-----------------------------------------------------------------------------------------------------------------------------------------------------------------------------------------------------------------------------------------------------------------------------------------------------------------------------------------------------------------------------------------------------------------------------------------------------------|--|--|--|--|--|--|
| <b>Time frame: Since the initial planning of the work</b> |                                                                                                                                                                                |                                                                                                                                                                                                                                                                                                                                                                                                                                                           |  |  |  |  |  |  |
| <b>1</b>                                                  | All support for the present manuscript (e.g., funding, provision of study materials, medical writing, article processing charges, etc.)<br><b>No time limit for this item.</b> | <div style="display: flex; align-items: flex-start;"> <div style="margin-right: 10px;"> <input checked="" type="checkbox"/> <b>None</b> </div> <table border="1" style="width: 100%; border-collapse: collapse;"> <tr><td style="height: 20px;"></td><td style="height: 20px;"></td></tr> <tr><td style="height: 20px;"></td><td style="height: 20px;"></td></tr> <tr><td style="height: 20px;"></td><td style="height: 20px;"></td></tr> </table> </div> |  |  |  |  |  |  |
|                                                           |                                                                                                                                                                                |                                                                                                                                                                                                                                                                                                                                                                                                                                                           |  |  |  |  |  |  |
|                                                           |                                                                                                                                                                                |                                                                                                                                                                                                                                                                                                                                                                                                                                                           |  |  |  |  |  |  |
|                                                           |                                                                                                                                                                                |                                                                                                                                                                                                                                                                                                                                                                                                                                                           |  |  |  |  |  |  |
| <b>Time frame: past 36 months</b>                         |                                                                                                                                                                                |                                                                                                                                                                                                                                                                                                                                                                                                                                                           |  |  |  |  |  |  |
| <b>2</b>                                                  | Grants or contracts from any entity (if not indicated in item #1 above).                                                                                                       | <div style="display: flex; align-items: flex-start;"> <div style="margin-right: 10px;"> <input checked="" type="checkbox"/> <b>None</b> </div> <table border="1" style="width: 100%; border-collapse: collapse;"> <tr><td style="height: 20px;"></td><td style="height: 20px;"></td></tr> <tr><td style="height: 20px;"></td><td style="height: 20px;"></td></tr> <tr><td style="height: 20px;"></td><td style="height: 20px;"></td></tr> </table> </div> |  |  |  |  |  |  |
|                                                           |                                                                                                                                                                                |                                                                                                                                                                                                                                                                                                                                                                                                                                                           |  |  |  |  |  |  |
|                                                           |                                                                                                                                                                                |                                                                                                                                                                                                                                                                                                                                                                                                                                                           |  |  |  |  |  |  |
|                                                           |                                                                                                                                                                                |                                                                                                                                                                                                                                                                                                                                                                                                                                                           |  |  |  |  |  |  |
| <b>3</b>                                                  | Royalties or licenses                                                                                                                                                          | <div style="display: flex; align-items: flex-start;"> <div style="margin-right: 10px;"> <input checked="" type="checkbox"/> <b>None</b> </div> <table border="1" style="width: 100%; border-collapse: collapse;"> <tr><td style="height: 20px;"></td><td style="height: 20px;"></td></tr> <tr><td style="height: 20px;"></td><td style="height: 20px;"></td></tr> <tr><td style="height: 20px;"></td><td style="height: 20px;"></td></tr> </table> </div> |  |  |  |  |  |  |
|                                                           |                                                                                                                                                                                |                                                                                                                                                                                                                                                                                                                                                                                                                                                           |  |  |  |  |  |  |
|                                                           |                                                                                                                                                                                |                                                                                                                                                                                                                                                                                                                                                                                                                                                           |  |  |  |  |  |  |
|                                                           |                                                                                                                                                                                |                                                                                                                                                                                                                                                                                                                                                                                                                                                           |  |  |  |  |  |  |

|    |                                                                                                              |                                                                                                                                                                                                                          |  |  |  |  |  |  |  |  |
|----|--------------------------------------------------------------------------------------------------------------|--------------------------------------------------------------------------------------------------------------------------------------------------------------------------------------------------------------------------|--|--|--|--|--|--|--|--|
| 4  | Consulting fees                                                                                              | <input checked="" type="checkbox"/> <b>None</b> <table border="1" data-bbox="370 205 1507 342"> <tr><td></td><td></td></tr> <tr><td></td><td></td></tr> <tr><td></td><td></td></tr> <tr><td></td><td></td></tr> </table> |  |  |  |  |  |  |  |  |
|    |                                                                                                              |                                                                                                                                                                                                                          |  |  |  |  |  |  |  |  |
|    |                                                                                                              |                                                                                                                                                                                                                          |  |  |  |  |  |  |  |  |
|    |                                                                                                              |                                                                                                                                                                                                                          |  |  |  |  |  |  |  |  |
|    |                                                                                                              |                                                                                                                                                                                                                          |  |  |  |  |  |  |  |  |
| 5  | Payment or honoraria for lectures, presentations, speakers bureaus, manuscript writing or educational events | <input checked="" type="checkbox"/> <b>None</b> <table border="1" data-bbox="370 493 1507 596"> <tr><td></td><td></td></tr> <tr><td></td><td></td></tr> <tr><td></td><td></td></tr> </table>                             |  |  |  |  |  |  |  |  |
|    |                                                                                                              |                                                                                                                                                                                                                          |  |  |  |  |  |  |  |  |
|    |                                                                                                              |                                                                                                                                                                                                                          |  |  |  |  |  |  |  |  |
|    |                                                                                                              |                                                                                                                                                                                                                          |  |  |  |  |  |  |  |  |
| 6  | Payment for expert testimony                                                                                 | <input checked="" type="checkbox"/> <b>None</b> <table border="1" data-bbox="370 833 1507 936"> <tr><td></td><td></td></tr> <tr><td></td><td></td></tr> <tr><td></td><td></td></tr> </table>                             |  |  |  |  |  |  |  |  |
|    |                                                                                                              |                                                                                                                                                                                                                          |  |  |  |  |  |  |  |  |
|    |                                                                                                              |                                                                                                                                                                                                                          |  |  |  |  |  |  |  |  |
|    |                                                                                                              |                                                                                                                                                                                                                          |  |  |  |  |  |  |  |  |
| 7  | Support for attending meetings and/or travel                                                                 | <input checked="" type="checkbox"/> <b>None</b> <table border="1" data-bbox="370 1089 1507 1192"> <tr><td></td><td></td></tr> <tr><td></td><td></td></tr> <tr><td></td><td></td></tr> </table>                           |  |  |  |  |  |  |  |  |
|    |                                                                                                              |                                                                                                                                                                                                                          |  |  |  |  |  |  |  |  |
|    |                                                                                                              |                                                                                                                                                                                                                          |  |  |  |  |  |  |  |  |
|    |                                                                                                              |                                                                                                                                                                                                                          |  |  |  |  |  |  |  |  |
| 8  | Patents planned, issued or pending                                                                           | <input checked="" type="checkbox"/> <b>None</b> <table border="1" data-bbox="370 1346 1507 1449"> <tr><td></td><td></td></tr> <tr><td></td><td></td></tr> <tr><td></td><td></td></tr> </table>                           |  |  |  |  |  |  |  |  |
|    |                                                                                                              |                                                                                                                                                                                                                          |  |  |  |  |  |  |  |  |
|    |                                                                                                              |                                                                                                                                                                                                                          |  |  |  |  |  |  |  |  |
|    |                                                                                                              |                                                                                                                                                                                                                          |  |  |  |  |  |  |  |  |
| 9  | Participation on a Data Safety Monitoring Board or Advisory Board                                            | <input checked="" type="checkbox"/> <b>None</b> <table border="1" data-bbox="370 1602 1507 1705"> <tr><td></td><td></td></tr> <tr><td></td><td></td></tr> <tr><td></td><td></td></tr> </table>                           |  |  |  |  |  |  |  |  |
|    |                                                                                                              |                                                                                                                                                                                                                          |  |  |  |  |  |  |  |  |
|    |                                                                                                              |                                                                                                                                                                                                                          |  |  |  |  |  |  |  |  |
|    |                                                                                                              |                                                                                                                                                                                                                          |  |  |  |  |  |  |  |  |
| 10 | Leadership or fiduciary role in other board, society, committee or                                           | <input checked="" type="checkbox"/> <b>None</b> <table border="1" data-bbox="370 1858 1507 1961"> <tr><td></td><td></td></tr> <tr><td></td><td></td></tr> <tr><td></td><td></td></tr> </table>                           |  |  |  |  |  |  |  |  |
|    |                                                                                                              |                                                                                                                                                                                                                          |  |  |  |  |  |  |  |  |
|    |                                                                                                              |                                                                                                                                                                                                                          |  |  |  |  |  |  |  |  |
|    |                                                                                                              |                                                                                                                                                                                                                          |  |  |  |  |  |  |  |  |

|                                                                                                                                                                                                                                                               |                                                                                                 |                                                 |  |
|---------------------------------------------------------------------------------------------------------------------------------------------------------------------------------------------------------------------------------------------------------------|-------------------------------------------------------------------------------------------------|-------------------------------------------------|--|
|                                                                                                                                                                                                                                                               | advocacy group,<br>paid or unpaid                                                               |                                                 |  |
| 11                                                                                                                                                                                                                                                            | Stock or stock<br>options                                                                       | <input checked="" type="checkbox"/> <b>None</b> |  |
|                                                                                                                                                                                                                                                               |                                                                                                 |                                                 |  |
|                                                                                                                                                                                                                                                               |                                                                                                 |                                                 |  |
|                                                                                                                                                                                                                                                               |                                                                                                 |                                                 |  |
| 12                                                                                                                                                                                                                                                            | Receipt of<br>equipment,<br>materials, drugs,<br>medical writing,<br>gifts or other<br>services | <input checked="" type="checkbox"/> <b>None</b> |  |
|                                                                                                                                                                                                                                                               |                                                                                                 |                                                 |  |
|                                                                                                                                                                                                                                                               |                                                                                                 |                                                 |  |
|                                                                                                                                                                                                                                                               |                                                                                                 |                                                 |  |
| 13                                                                                                                                                                                                                                                            | Other financial<br>or non-financial<br>interests                                                | <input checked="" type="checkbox"/> <b>None</b> |  |
|                                                                                                                                                                                                                                                               |                                                                                                 |                                                 |  |
|                                                                                                                                                                                                                                                               |                                                                                                 |                                                 |  |
|                                                                                                                                                                                                                                                               |                                                                                                 |                                                 |  |
| <p><b>Please place an "X" next to the following statement to indicate your agreement:</b></p> <p><input checked="" type="checkbox"/> I certify that I have answered every question and have not altered the wording of any of the questions on this form.</p> |                                                                                                 |                                                 |  |

## ICMJE DISCLOSURE FORM

**Date:** 12/12/2021

**Your Name:** Ester C. Sabino

**Manuscript Title:** Clonal Hematopoiesis in Sickle Cell Disease

**Manuscript Number (if known):** 156060-JCI-CMED-RV-2

In the interest of transparency, we ask you to disclose all relationships/activities/interests listed below that are related to the content of your manuscript. "Related" means any relation with for-profit or not-for-profit third parties whose interests may be affected by the content of the manuscript. Disclosure represents a commitment to transparency and does not necessarily indicate a bias. If you are in doubt about whether to list a relationship/activity/interest, it is preferable that you do so.

The author's relationships/activities/interests should be defined broadly. For example, if your manuscript pertains to the epidemiology of hypertension, you should declare all relationships with manufacturers of antihypertensive medication, even if that medication is not mentioned in the manuscript.

In item #1 below, report all support for the work reported in this manuscript without time limit. For all other items, the time frame for disclosure is the past 36 months.

|                                                           |                                                                                                                                                                                | Name all entities with whom you have this relationship or indicate none (add rows as needed)                                                                                                                                                                                                                                                                                                                                        | Specifications/Comments (e.g., if payments were made to you or to your institution) |  |  |  |  |  |  |
|-----------------------------------------------------------|--------------------------------------------------------------------------------------------------------------------------------------------------------------------------------|-------------------------------------------------------------------------------------------------------------------------------------------------------------------------------------------------------------------------------------------------------------------------------------------------------------------------------------------------------------------------------------------------------------------------------------|-------------------------------------------------------------------------------------|--|--|--|--|--|--|
| <b>Time frame: Since the initial planning of the work</b> |                                                                                                                                                                                |                                                                                                                                                                                                                                                                                                                                                                                                                                     |                                                                                     |  |  |  |  |  |  |
| 1                                                         | All support for the present manuscript (e.g., funding, provision of study materials, medical writing, article processing charges, etc.)<br><b>No time limit for this item.</b> | <div style="display: flex; align-items: flex-start;"> <input checked="" type="checkbox"/> <b>None</b> <table border="1" style="margin-left: 20px; width: 100%; border-collapse: collapse;"> <tr><td style="height: 20px;"></td><td style="height: 20px;"></td></tr> <tr><td style="height: 20px;"></td><td style="height: 20px;"></td></tr> <tr><td style="height: 20px;"></td><td style="height: 20px;"></td></tr> </table> </div> |                                                                                     |  |  |  |  |  |  |
|                                                           |                                                                                                                                                                                |                                                                                                                                                                                                                                                                                                                                                                                                                                     |                                                                                     |  |  |  |  |  |  |
|                                                           |                                                                                                                                                                                |                                                                                                                                                                                                                                                                                                                                                                                                                                     |                                                                                     |  |  |  |  |  |  |
|                                                           |                                                                                                                                                                                |                                                                                                                                                                                                                                                                                                                                                                                                                                     |                                                                                     |  |  |  |  |  |  |
| <b>Time frame: past 36 months</b>                         |                                                                                                                                                                                |                                                                                                                                                                                                                                                                                                                                                                                                                                     |                                                                                     |  |  |  |  |  |  |
| 2                                                         | Grants or contracts from any entity (if not indicated in item #1 above).                                                                                                       | <div style="display: flex; align-items: flex-start;"> <input checked="" type="checkbox"/> <b>None</b> <table border="1" style="margin-left: 20px; width: 100%; border-collapse: collapse;"> <tr><td style="height: 20px;"></td><td style="height: 20px;"></td></tr> <tr><td style="height: 20px;"></td><td style="height: 20px;"></td></tr> <tr><td style="height: 20px;"></td><td style="height: 20px;"></td></tr> </table> </div> |                                                                                     |  |  |  |  |  |  |
|                                                           |                                                                                                                                                                                |                                                                                                                                                                                                                                                                                                                                                                                                                                     |                                                                                     |  |  |  |  |  |  |
|                                                           |                                                                                                                                                                                |                                                                                                                                                                                                                                                                                                                                                                                                                                     |                                                                                     |  |  |  |  |  |  |
|                                                           |                                                                                                                                                                                |                                                                                                                                                                                                                                                                                                                                                                                                                                     |                                                                                     |  |  |  |  |  |  |
| 3                                                         | Royalties or licenses                                                                                                                                                          | <div style="display: flex; align-items: flex-start;"> <input checked="" type="checkbox"/> <b>None</b> <table border="1" style="margin-left: 20px; width: 100%; border-collapse: collapse;"> <tr><td style="height: 20px;"></td><td style="height: 20px;"></td></tr> <tr><td style="height: 20px;"></td><td style="height: 20px;"></td></tr> <tr><td style="height: 20px;"></td><td style="height: 20px;"></td></tr> </table> </div> |                                                                                     |  |  |  |  |  |  |
|                                                           |                                                                                                                                                                                |                                                                                                                                                                                                                                                                                                                                                                                                                                     |                                                                                     |  |  |  |  |  |  |
|                                                           |                                                                                                                                                                                |                                                                                                                                                                                                                                                                                                                                                                                                                                     |                                                                                     |  |  |  |  |  |  |
|                                                           |                                                                                                                                                                                |                                                                                                                                                                                                                                                                                                                                                                                                                                     |                                                                                     |  |  |  |  |  |  |

|    |                                                                                                              |                                                                                                                                                                                                                          |  |  |  |  |  |  |  |  |
|----|--------------------------------------------------------------------------------------------------------------|--------------------------------------------------------------------------------------------------------------------------------------------------------------------------------------------------------------------------|--|--|--|--|--|--|--|--|
| 4  | Consulting fees                                                                                              | <input checked="" type="checkbox"/> <b>None</b> <table border="1" data-bbox="370 205 1507 342"> <tr><td></td><td></td></tr> <tr><td></td><td></td></tr> <tr><td></td><td></td></tr> <tr><td></td><td></td></tr> </table> |  |  |  |  |  |  |  |  |
|    |                                                                                                              |                                                                                                                                                                                                                          |  |  |  |  |  |  |  |  |
|    |                                                                                                              |                                                                                                                                                                                                                          |  |  |  |  |  |  |  |  |
|    |                                                                                                              |                                                                                                                                                                                                                          |  |  |  |  |  |  |  |  |
|    |                                                                                                              |                                                                                                                                                                                                                          |  |  |  |  |  |  |  |  |
| 5  | Payment or honoraria for lectures, presentations, speakers bureaus, manuscript writing or educational events | <input checked="" type="checkbox"/> <b>None</b> <table border="1" data-bbox="370 493 1507 596"> <tr><td></td><td></td></tr> <tr><td></td><td></td></tr> <tr><td></td><td></td></tr> </table>                             |  |  |  |  |  |  |  |  |
|    |                                                                                                              |                                                                                                                                                                                                                          |  |  |  |  |  |  |  |  |
|    |                                                                                                              |                                                                                                                                                                                                                          |  |  |  |  |  |  |  |  |
|    |                                                                                                              |                                                                                                                                                                                                                          |  |  |  |  |  |  |  |  |
| 6  | Payment for expert testimony                                                                                 | <input checked="" type="checkbox"/> <b>None</b> <table border="1" data-bbox="370 833 1507 936"> <tr><td></td><td></td></tr> <tr><td></td><td></td></tr> <tr><td></td><td></td></tr> </table>                             |  |  |  |  |  |  |  |  |
|    |                                                                                                              |                                                                                                                                                                                                                          |  |  |  |  |  |  |  |  |
|    |                                                                                                              |                                                                                                                                                                                                                          |  |  |  |  |  |  |  |  |
|    |                                                                                                              |                                                                                                                                                                                                                          |  |  |  |  |  |  |  |  |
| 7  | Support for attending meetings and/or travel                                                                 | <input checked="" type="checkbox"/> <b>None</b> <table border="1" data-bbox="370 1089 1507 1192"> <tr><td></td><td></td></tr> <tr><td></td><td></td></tr> <tr><td></td><td></td></tr> </table>                           |  |  |  |  |  |  |  |  |
|    |                                                                                                              |                                                                                                                                                                                                                          |  |  |  |  |  |  |  |  |
|    |                                                                                                              |                                                                                                                                                                                                                          |  |  |  |  |  |  |  |  |
|    |                                                                                                              |                                                                                                                                                                                                                          |  |  |  |  |  |  |  |  |
| 8  | Patents planned, issued or pending                                                                           | <input checked="" type="checkbox"/> <b>None</b> <table border="1" data-bbox="370 1346 1507 1449"> <tr><td></td><td></td></tr> <tr><td></td><td></td></tr> <tr><td></td><td></td></tr> </table>                           |  |  |  |  |  |  |  |  |
|    |                                                                                                              |                                                                                                                                                                                                                          |  |  |  |  |  |  |  |  |
|    |                                                                                                              |                                                                                                                                                                                                                          |  |  |  |  |  |  |  |  |
|    |                                                                                                              |                                                                                                                                                                                                                          |  |  |  |  |  |  |  |  |
| 9  | Participation on a Data Safety Monitoring Board or Advisory Board                                            | <input checked="" type="checkbox"/> <b>None</b> <table border="1" data-bbox="370 1602 1507 1705"> <tr><td></td><td></td></tr> <tr><td></td><td></td></tr> <tr><td></td><td></td></tr> </table>                           |  |  |  |  |  |  |  |  |
|    |                                                                                                              |                                                                                                                                                                                                                          |  |  |  |  |  |  |  |  |
|    |                                                                                                              |                                                                                                                                                                                                                          |  |  |  |  |  |  |  |  |
|    |                                                                                                              |                                                                                                                                                                                                                          |  |  |  |  |  |  |  |  |
| 10 | Leadership or fiduciary role in other board, society, committee or                                           | <input checked="" type="checkbox"/> <b>None</b> <table border="1" data-bbox="370 1858 1507 1961"> <tr><td></td><td></td></tr> <tr><td></td><td></td></tr> <tr><td></td><td></td></tr> </table>                           |  |  |  |  |  |  |  |  |
|    |                                                                                                              |                                                                                                                                                                                                                          |  |  |  |  |  |  |  |  |
|    |                                                                                                              |                                                                                                                                                                                                                          |  |  |  |  |  |  |  |  |
|    |                                                                                                              |                                                                                                                                                                                                                          |  |  |  |  |  |  |  |  |

|                                                                                                                                                                                                                                                               |                                                                                                 |                                                 |  |
|---------------------------------------------------------------------------------------------------------------------------------------------------------------------------------------------------------------------------------------------------------------|-------------------------------------------------------------------------------------------------|-------------------------------------------------|--|
|                                                                                                                                                                                                                                                               | advocacy group,<br>paid or unpaid                                                               |                                                 |  |
| 11                                                                                                                                                                                                                                                            | Stock or stock<br>options                                                                       | <input checked="" type="checkbox"/> <b>None</b> |  |
|                                                                                                                                                                                                                                                               |                                                                                                 |                                                 |  |
|                                                                                                                                                                                                                                                               |                                                                                                 |                                                 |  |
|                                                                                                                                                                                                                                                               |                                                                                                 |                                                 |  |
| 12                                                                                                                                                                                                                                                            | Receipt of<br>equipment,<br>materials, drugs,<br>medical writing,<br>gifts or other<br>services | <input checked="" type="checkbox"/> <b>None</b> |  |
|                                                                                                                                                                                                                                                               |                                                                                                 |                                                 |  |
|                                                                                                                                                                                                                                                               |                                                                                                 |                                                 |  |
|                                                                                                                                                                                                                                                               |                                                                                                 |                                                 |  |
| 13                                                                                                                                                                                                                                                            | Other financial<br>or non-financial<br>interests                                                | <input checked="" type="checkbox"/> <b>None</b> |  |
|                                                                                                                                                                                                                                                               |                                                                                                 |                                                 |  |
|                                                                                                                                                                                                                                                               |                                                                                                 |                                                 |  |
|                                                                                                                                                                                                                                                               |                                                                                                 |                                                 |  |
| <p><b>Please place an "X" next to the following statement to indicate your agreement:</b></p> <p><input checked="" type="checkbox"/> I certify that I have answered every question and have not altered the wording of any of the questions on this form.</p> |                                                                                                 |                                                 |  |



## ICMJE DISCLOSURE FORM

**Date:** 12/9/2021

**Your Name:** Paula Loureiro

**Manuscript Title:** Clonal Hematopoiesis in Sickle Cell Disease

**Manuscript Number (if known):** 156060-JCI-CMED-RV-2

In the interest of transparency, we ask you to disclose all relationships/activities/interests listed below that are related to the content of your manuscript. "Related" means any relation with for-profit or not-for-profit third parties whose interests may be affected by the content of the manuscript. Disclosure represents a commitment to transparency and does not necessarily indicate a bias. If you are in doubt about whether to list a relationship/activity/interest, it is preferable that you do so.

The author's relationships/activities/interests should be defined broadly. For example, if your manuscript pertains to the epidemiology of hypertension, you should declare all relationships with manufacturers of antihypertensive medication, even if that medication is not mentioned in the manuscript.

In item #1 below, report all support for the work reported in this manuscript without time limit. For all other items, the time frame for disclosure is the past 36 months.

|                                                           |                                                                                                                                                                                | Name all entities with whom you have this relationship or indicate none (add rows as needed)                                                                                                                                                                                                                                                                                                                                        | Specifications/Comments (e.g., if payments were made to you or to your institution) |  |  |  |  |  |  |
|-----------------------------------------------------------|--------------------------------------------------------------------------------------------------------------------------------------------------------------------------------|-------------------------------------------------------------------------------------------------------------------------------------------------------------------------------------------------------------------------------------------------------------------------------------------------------------------------------------------------------------------------------------------------------------------------------------|-------------------------------------------------------------------------------------|--|--|--|--|--|--|
| <b>Time frame: Since the initial planning of the work</b> |                                                                                                                                                                                |                                                                                                                                                                                                                                                                                                                                                                                                                                     |                                                                                     |  |  |  |  |  |  |
| <b>1</b>                                                  | All support for the present manuscript (e.g., funding, provision of study materials, medical writing, article processing charges, etc.)<br><b>No time limit for this item.</b> | <div style="display: flex; align-items: flex-start;"> <input checked="" type="checkbox"/> <b>None</b> <table border="1" style="margin-left: 20px; width: 100%; border-collapse: collapse;"> <tr><td style="height: 20px;"></td><td style="height: 20px;"></td></tr> <tr><td style="height: 20px;"></td><td style="height: 20px;"></td></tr> <tr><td style="height: 20px;"></td><td style="height: 20px;"></td></tr> </table> </div> |                                                                                     |  |  |  |  |  |  |
|                                                           |                                                                                                                                                                                |                                                                                                                                                                                                                                                                                                                                                                                                                                     |                                                                                     |  |  |  |  |  |  |
|                                                           |                                                                                                                                                                                |                                                                                                                                                                                                                                                                                                                                                                                                                                     |                                                                                     |  |  |  |  |  |  |
|                                                           |                                                                                                                                                                                |                                                                                                                                                                                                                                                                                                                                                                                                                                     |                                                                                     |  |  |  |  |  |  |
| <b>Time frame: past 36 months</b>                         |                                                                                                                                                                                |                                                                                                                                                                                                                                                                                                                                                                                                                                     |                                                                                     |  |  |  |  |  |  |
| <b>2</b>                                                  | Grants or contracts from any entity (if not indicated in item #1 above).                                                                                                       | <div style="display: flex; align-items: flex-start;"> <input checked="" type="checkbox"/> <b>None</b> <table border="1" style="margin-left: 20px; width: 100%; border-collapse: collapse;"> <tr><td style="height: 20px;"></td><td style="height: 20px;"></td></tr> <tr><td style="height: 20px;"></td><td style="height: 20px;"></td></tr> <tr><td style="height: 20px;"></td><td style="height: 20px;"></td></tr> </table> </div> |                                                                                     |  |  |  |  |  |  |
|                                                           |                                                                                                                                                                                |                                                                                                                                                                                                                                                                                                                                                                                                                                     |                                                                                     |  |  |  |  |  |  |
|                                                           |                                                                                                                                                                                |                                                                                                                                                                                                                                                                                                                                                                                                                                     |                                                                                     |  |  |  |  |  |  |
|                                                           |                                                                                                                                                                                |                                                                                                                                                                                                                                                                                                                                                                                                                                     |                                                                                     |  |  |  |  |  |  |
| <b>3</b>                                                  | Royalties or licenses                                                                                                                                                          | <div style="display: flex; align-items: flex-start;"> <input checked="" type="checkbox"/> <b>None</b> <table border="1" style="margin-left: 20px; width: 100%; border-collapse: collapse;"> <tr><td style="height: 20px;"></td><td style="height: 20px;"></td></tr> <tr><td style="height: 20px;"></td><td style="height: 20px;"></td></tr> <tr><td style="height: 20px;"></td><td style="height: 20px;"></td></tr> </table> </div> |                                                                                     |  |  |  |  |  |  |
|                                                           |                                                                                                                                                                                |                                                                                                                                                                                                                                                                                                                                                                                                                                     |                                                                                     |  |  |  |  |  |  |
|                                                           |                                                                                                                                                                                |                                                                                                                                                                                                                                                                                                                                                                                                                                     |                                                                                     |  |  |  |  |  |  |
|                                                           |                                                                                                                                                                                |                                                                                                                                                                                                                                                                                                                                                                                                                                     |                                                                                     |  |  |  |  |  |  |

|    |                                                                                                              |                                                                                                                                                                                                                          |  |  |  |  |  |  |  |  |
|----|--------------------------------------------------------------------------------------------------------------|--------------------------------------------------------------------------------------------------------------------------------------------------------------------------------------------------------------------------|--|--|--|--|--|--|--|--|
| 4  | Consulting fees                                                                                              | <input checked="" type="checkbox"/> <b>None</b> <table border="1" data-bbox="370 205 1507 342"> <tr><td></td><td></td></tr> <tr><td></td><td></td></tr> <tr><td></td><td></td></tr> <tr><td></td><td></td></tr> </table> |  |  |  |  |  |  |  |  |
|    |                                                                                                              |                                                                                                                                                                                                                          |  |  |  |  |  |  |  |  |
|    |                                                                                                              |                                                                                                                                                                                                                          |  |  |  |  |  |  |  |  |
|    |                                                                                                              |                                                                                                                                                                                                                          |  |  |  |  |  |  |  |  |
|    |                                                                                                              |                                                                                                                                                                                                                          |  |  |  |  |  |  |  |  |
| 5  | Payment or honoraria for lectures, presentations, speakers bureaus, manuscript writing or educational events | <input checked="" type="checkbox"/> <b>None</b> <table border="1" data-bbox="370 493 1507 596"> <tr><td></td><td></td></tr> <tr><td></td><td></td></tr> <tr><td></td><td></td></tr> </table>                             |  |  |  |  |  |  |  |  |
|    |                                                                                                              |                                                                                                                                                                                                                          |  |  |  |  |  |  |  |  |
|    |                                                                                                              |                                                                                                                                                                                                                          |  |  |  |  |  |  |  |  |
|    |                                                                                                              |                                                                                                                                                                                                                          |  |  |  |  |  |  |  |  |
| 6  | Payment for expert testimony                                                                                 | <input checked="" type="checkbox"/> <b>None</b> <table border="1" data-bbox="370 833 1507 936"> <tr><td></td><td></td></tr> <tr><td></td><td></td></tr> <tr><td></td><td></td></tr> </table>                             |  |  |  |  |  |  |  |  |
|    |                                                                                                              |                                                                                                                                                                                                                          |  |  |  |  |  |  |  |  |
|    |                                                                                                              |                                                                                                                                                                                                                          |  |  |  |  |  |  |  |  |
|    |                                                                                                              |                                                                                                                                                                                                                          |  |  |  |  |  |  |  |  |
| 7  | Support for attending meetings and/or travel                                                                 | <input type="checkbox"/> <b>None</b> <table border="1" data-bbox="370 1089 1507 1192"> <tr><td></td><td></td></tr> <tr><td></td><td></td></tr> <tr><td></td><td></td></tr> </table>                                      |  |  |  |  |  |  |  |  |
|    |                                                                                                              |                                                                                                                                                                                                                          |  |  |  |  |  |  |  |  |
|    |                                                                                                              |                                                                                                                                                                                                                          |  |  |  |  |  |  |  |  |
|    |                                                                                                              |                                                                                                                                                                                                                          |  |  |  |  |  |  |  |  |
| 8  | Patents planned, issued or pending                                                                           | <input checked="" type="checkbox"/> <b>None</b> <table border="1" data-bbox="370 1346 1507 1449"> <tr><td></td><td></td></tr> <tr><td></td><td></td></tr> <tr><td></td><td></td></tr> </table>                           |  |  |  |  |  |  |  |  |
|    |                                                                                                              |                                                                                                                                                                                                                          |  |  |  |  |  |  |  |  |
|    |                                                                                                              |                                                                                                                                                                                                                          |  |  |  |  |  |  |  |  |
|    |                                                                                                              |                                                                                                                                                                                                                          |  |  |  |  |  |  |  |  |
| 9  | Participation on a Data Safety Monitoring Board or Advisory Board                                            | <input checked="" type="checkbox"/> <b>None</b> <table border="1" data-bbox="370 1602 1507 1705"> <tr><td></td><td></td></tr> <tr><td></td><td></td></tr> <tr><td></td><td></td></tr> </table>                           |  |  |  |  |  |  |  |  |
|    |                                                                                                              |                                                                                                                                                                                                                          |  |  |  |  |  |  |  |  |
|    |                                                                                                              |                                                                                                                                                                                                                          |  |  |  |  |  |  |  |  |
|    |                                                                                                              |                                                                                                                                                                                                                          |  |  |  |  |  |  |  |  |
| 10 | Leadership or fiduciary role in other board, society, committee or                                           | <input checked="" type="checkbox"/> <b>None</b> <table border="1" data-bbox="370 1858 1507 1961"> <tr><td></td><td></td></tr> <tr><td></td><td></td></tr> <tr><td></td><td></td></tr> </table>                           |  |  |  |  |  |  |  |  |
|    |                                                                                                              |                                                                                                                                                                                                                          |  |  |  |  |  |  |  |  |
|    |                                                                                                              |                                                                                                                                                                                                                          |  |  |  |  |  |  |  |  |
|    |                                                                                                              |                                                                                                                                                                                                                          |  |  |  |  |  |  |  |  |

|                                                                                                                                                                                                                                                               |                                                                                                 |                                                 |  |
|---------------------------------------------------------------------------------------------------------------------------------------------------------------------------------------------------------------------------------------------------------------|-------------------------------------------------------------------------------------------------|-------------------------------------------------|--|
|                                                                                                                                                                                                                                                               | advocacy group,<br>paid or unpaid                                                               |                                                 |  |
| 11                                                                                                                                                                                                                                                            | Stock or stock<br>options                                                                       | <input checked="" type="checkbox"/> <b>None</b> |  |
|                                                                                                                                                                                                                                                               |                                                                                                 |                                                 |  |
|                                                                                                                                                                                                                                                               |                                                                                                 |                                                 |  |
|                                                                                                                                                                                                                                                               |                                                                                                 |                                                 |  |
| 12                                                                                                                                                                                                                                                            | Receipt of<br>equipment,<br>materials, drugs,<br>medical writing,<br>gifts or other<br>services | <input checked="" type="checkbox"/> <b>None</b> |  |
|                                                                                                                                                                                                                                                               |                                                                                                 |                                                 |  |
|                                                                                                                                                                                                                                                               |                                                                                                 |                                                 |  |
|                                                                                                                                                                                                                                                               |                                                                                                 |                                                 |  |
| 13                                                                                                                                                                                                                                                            | Other financial<br>or non-financial<br>interests                                                | <input checked="" type="checkbox"/> <b>None</b> |  |
|                                                                                                                                                                                                                                                               |                                                                                                 |                                                 |  |
|                                                                                                                                                                                                                                                               |                                                                                                 |                                                 |  |
|                                                                                                                                                                                                                                                               |                                                                                                 |                                                 |  |
| <p><b>Please place an "X" next to the following statement to indicate your agreement:</b></p> <p><input checked="" type="checkbox"/> I certify that I have answered every question and have not altered the wording of any of the questions on this form.</p> |                                                                                                 |                                                 |  |

# ICMJE DISCLOSURE FORM

**Date:** 11/12/2021

**Your Name:** ANNA BARBARA F CARNEIRO-PROIETTI

**Manuscript Title:** Clonal Hematopoiesis in Sick Cell Disease

**Manuscript Number (if known):** 156060-JCI-CMED-RV-2

In the interest of transparency, we ask you to disclose all relationships/activities/interests listed below that are related to the content of your manuscript. "Related" means any relation with for-profit or not-for-profit third parties whose interests may be affected by the content of the manuscript. Disclosure represents a commitment to transparency and does not necessarily indicate a bias. If you are in doubt about whether to list a relationship/activity/interest, it is preferable that you do so.

The author's relationships/activities/interests should be defined broadly. For example, if your manuscript pertains to the epidemiology of hypertension, you should declare all relationships with manufacturers of antihypertensive medication, even if that medication is not mentioned in the manuscript.

In item #1 below, report all support for the work reported in this manuscript without time limit. For all other items, the time frame for disclosure is the past 36 months.

|                                                           | Name all entities with whom you have this relationship or indicate none (add rows as needed)                                                                                   | Specifications/Comments (e.g., if payments were made to you or to your institution)                                                                                                                          |  |  |  |  |  |  |
|-----------------------------------------------------------|--------------------------------------------------------------------------------------------------------------------------------------------------------------------------------|--------------------------------------------------------------------------------------------------------------------------------------------------------------------------------------------------------------|--|--|--|--|--|--|
| <b>Time frame: Since the initial planning of the work</b> |                                                                                                                                                                                |                                                                                                                                                                                                              |  |  |  |  |  |  |
| <b>1</b>                                                  | All support for the present manuscript (e.g., funding, provision of study materials, medical writing, article processing charges, etc.)<br><b>No time limit for this item.</b> | <input checked="" type="checkbox"/> <b>None</b><br><table border="1"> <tr><td></td><td></td></tr> <tr><td></td><td></td></tr> <tr><td></td><td></td></tr> </table> Click the tab key to add additional rows. |  |  |  |  |  |  |
|                                                           |                                                                                                                                                                                |                                                                                                                                                                                                              |  |  |  |  |  |  |
|                                                           |                                                                                                                                                                                |                                                                                                                                                                                                              |  |  |  |  |  |  |
|                                                           |                                                                                                                                                                                |                                                                                                                                                                                                              |  |  |  |  |  |  |
| <b>Time frame: past 36 months</b>                         |                                                                                                                                                                                |                                                                                                                                                                                                              |  |  |  |  |  |  |
| <b>2</b>                                                  | Grants or contracts from any entity (if not indicated in item #1 above).                                                                                                       | <input checked="" type="checkbox"/> <b>None</b><br><table border="1"> <tr><td></td><td></td></tr> <tr><td></td><td></td></tr> <tr><td></td><td></td></tr> </table>                                           |  |  |  |  |  |  |
|                                                           |                                                                                                                                                                                |                                                                                                                                                                                                              |  |  |  |  |  |  |
|                                                           |                                                                                                                                                                                |                                                                                                                                                                                                              |  |  |  |  |  |  |
|                                                           |                                                                                                                                                                                |                                                                                                                                                                                                              |  |  |  |  |  |  |
| <b>3</b>                                                  | Royalties or licenses                                                                                                                                                          | <input checked="" type="checkbox"/> <b>None</b><br><table border="1"> <tr><td></td><td></td></tr> <tr><td></td><td></td></tr> <tr><td></td><td></td></tr> </table>                                           |  |  |  |  |  |  |
|                                                           |                                                                                                                                                                                |                                                                                                                                                                                                              |  |  |  |  |  |  |
|                                                           |                                                                                                                                                                                |                                                                                                                                                                                                              |  |  |  |  |  |  |
|                                                           |                                                                                                                                                                                |                                                                                                                                                                                                              |  |  |  |  |  |  |

|    |                                                                                                              | Name all entities with whom you have this relationship or indicate none (add rows as needed)                                                                                            | Specifications/Comments (e.g., if payments were made to you or to your institution) |  |  |  |  |  |  |  |  |
|----|--------------------------------------------------------------------------------------------------------------|-----------------------------------------------------------------------------------------------------------------------------------------------------------------------------------------|-------------------------------------------------------------------------------------|--|--|--|--|--|--|--|--|
| 4  | Consulting fees                                                                                              | <input checked="" type="checkbox"/> None<br><table border="1"> <tr><td></td><td></td></tr> <tr><td></td><td></td></tr> <tr><td></td><td></td></tr> <tr><td></td><td></td></tr> </table> |                                                                                     |  |  |  |  |  |  |  |  |
|    |                                                                                                              |                                                                                                                                                                                         |                                                                                     |  |  |  |  |  |  |  |  |
|    |                                                                                                              |                                                                                                                                                                                         |                                                                                     |  |  |  |  |  |  |  |  |
|    |                                                                                                              |                                                                                                                                                                                         |                                                                                     |  |  |  |  |  |  |  |  |
|    |                                                                                                              |                                                                                                                                                                                         |                                                                                     |  |  |  |  |  |  |  |  |
| 5  | Payment or honoraria for lectures, presentations, speakers bureaus, manuscript writing or educational events | <input checked="" type="checkbox"/> None<br><table border="1"> <tr><td></td><td></td></tr> <tr><td></td><td></td></tr> <tr><td></td><td></td></tr> </table>                             |                                                                                     |  |  |  |  |  |  |  |  |
|    |                                                                                                              |                                                                                                                                                                                         |                                                                                     |  |  |  |  |  |  |  |  |
|    |                                                                                                              |                                                                                                                                                                                         |                                                                                     |  |  |  |  |  |  |  |  |
|    |                                                                                                              |                                                                                                                                                                                         |                                                                                     |  |  |  |  |  |  |  |  |
| 6  | Payment for expert testimony                                                                                 | <input checked="" type="checkbox"/> None<br><table border="1"> <tr><td></td><td></td></tr> <tr><td></td><td></td></tr> <tr><td></td><td></td></tr> </table>                             |                                                                                     |  |  |  |  |  |  |  |  |
|    |                                                                                                              |                                                                                                                                                                                         |                                                                                     |  |  |  |  |  |  |  |  |
|    |                                                                                                              |                                                                                                                                                                                         |                                                                                     |  |  |  |  |  |  |  |  |
|    |                                                                                                              |                                                                                                                                                                                         |                                                                                     |  |  |  |  |  |  |  |  |
| 7  | Support for attending meetings and/or travel                                                                 | <input checked="" type="checkbox"/> None<br><table border="1"> <tr><td></td><td></td></tr> <tr><td></td><td></td></tr> <tr><td></td><td></td></tr> </table>                             |                                                                                     |  |  |  |  |  |  |  |  |
|    |                                                                                                              |                                                                                                                                                                                         |                                                                                     |  |  |  |  |  |  |  |  |
|    |                                                                                                              |                                                                                                                                                                                         |                                                                                     |  |  |  |  |  |  |  |  |
|    |                                                                                                              |                                                                                                                                                                                         |                                                                                     |  |  |  |  |  |  |  |  |
| 8  | Patents planned, issued or pending                                                                           | <input checked="" type="checkbox"/> None<br><table border="1"> <tr><td></td><td></td></tr> <tr><td></td><td></td></tr> <tr><td></td><td></td></tr> </table>                             |                                                                                     |  |  |  |  |  |  |  |  |
|    |                                                                                                              |                                                                                                                                                                                         |                                                                                     |  |  |  |  |  |  |  |  |
|    |                                                                                                              |                                                                                                                                                                                         |                                                                                     |  |  |  |  |  |  |  |  |
|    |                                                                                                              |                                                                                                                                                                                         |                                                                                     |  |  |  |  |  |  |  |  |
| 9  | Participation on a Data Safety Monitoring Board or Advisory Board                                            | <input checked="" type="checkbox"/> None<br><table border="1"> <tr><td></td><td></td></tr> <tr><td></td><td></td></tr> <tr><td></td><td></td></tr> </table>                             |                                                                                     |  |  |  |  |  |  |  |  |
|    |                                                                                                              |                                                                                                                                                                                         |                                                                                     |  |  |  |  |  |  |  |  |
|    |                                                                                                              |                                                                                                                                                                                         |                                                                                     |  |  |  |  |  |  |  |  |
|    |                                                                                                              |                                                                                                                                                                                         |                                                                                     |  |  |  |  |  |  |  |  |
| 10 | Leadership or fiduciary role in other board, society, committee or advocacy group, paid or unpaid            | <input checked="" type="checkbox"/> None<br><table border="1"> <tr><td></td><td></td></tr> <tr><td></td><td></td></tr> <tr><td></td><td></td></tr> </table>                             |                                                                                     |  |  |  |  |  |  |  |  |
|    |                                                                                                              |                                                                                                                                                                                         |                                                                                     |  |  |  |  |  |  |  |  |
|    |                                                                                                              |                                                                                                                                                                                         |                                                                                     |  |  |  |  |  |  |  |  |
|    |                                                                                                              |                                                                                                                                                                                         |                                                                                     |  |  |  |  |  |  |  |  |

|    |                                                                                  | Name all entities with whom you have this relationship or indicate none (add rows as needed)                                                                | Specifications/Comments (e.g., if payments were made to you or to your institution) |  |  |  |  |  |  |
|----|----------------------------------------------------------------------------------|-------------------------------------------------------------------------------------------------------------------------------------------------------------|-------------------------------------------------------------------------------------|--|--|--|--|--|--|
| 11 | Stock or stock options                                                           | <input checked="" type="checkbox"/> None<br><table border="1"> <tr><td></td><td></td></tr> <tr><td></td><td></td></tr> <tr><td></td><td></td></tr> </table> |                                                                                     |  |  |  |  |  |  |
|    |                                                                                  |                                                                                                                                                             |                                                                                     |  |  |  |  |  |  |
|    |                                                                                  |                                                                                                                                                             |                                                                                     |  |  |  |  |  |  |
|    |                                                                                  |                                                                                                                                                             |                                                                                     |  |  |  |  |  |  |
| 12 | Receipt of equipment, materials, drugs, medical writing, gifts or other services | <input checked="" type="checkbox"/> None<br><table border="1"> <tr><td></td><td></td></tr> <tr><td></td><td></td></tr> <tr><td></td><td></td></tr> </table> |                                                                                     |  |  |  |  |  |  |
|    |                                                                                  |                                                                                                                                                             |                                                                                     |  |  |  |  |  |  |
|    |                                                                                  |                                                                                                                                                             |                                                                                     |  |  |  |  |  |  |
|    |                                                                                  |                                                                                                                                                             |                                                                                     |  |  |  |  |  |  |
| 13 | Other financial or non-financial interests                                       | <input checked="" type="checkbox"/> None<br><table border="1"> <tr><td></td><td></td></tr> <tr><td></td><td></td></tr> <tr><td></td><td></td></tr> </table> |                                                                                     |  |  |  |  |  |  |
|    |                                                                                  |                                                                                                                                                             |                                                                                     |  |  |  |  |  |  |
|    |                                                                                  |                                                                                                                                                             |                                                                                     |  |  |  |  |  |  |
|    |                                                                                  |                                                                                                                                                             |                                                                                     |  |  |  |  |  |  |

Please place an "X" next to the following statement to indicate your agreement:

☒ I certify that I have answered every question and have not altered the wording of any of the questions on this form.

*Ana Barbara Olt.*

## ICMJE DISCLOSURE FORM

**Date:** 12/9/2021

**Your Name:** Claudia de Alvarenga Maximo

**Manuscript Title:** Clonal Hematopoiesis in Sickle Cell Disease

**Manuscript Number (if known):** 156060-JCI-CMED-RV-2

In the interest of transparency, we ask you to disclose all relationships/activities/interests listed below that are related to the content of your manuscript. "Related" means any relation with for-profit or not-for-profit third parties whose interests may be affected by the content of the manuscript. Disclosure represents a commitment to transparency and does not necessarily indicate a bias. If you are in doubt about whether to list a relationship/activity/interest, it is preferable that you do so.

The author's relationships/activities/interests should be defined broadly. For example, if your manuscript pertains to the epidemiology of hypertension, you should declare all relationships with manufacturers of antihypertensive medication, even if that medication is not mentioned in the manuscript.

In item #1 below, report all support for the work reported in this manuscript without time limit. For all other items, the time frame for disclosure is the past 36 months.

|                                                           | Name all entities with whom you have this relationship or indicate none (add rows as needed)                                                                                   | Specifications/Comments (e.g., if payments were made to you or to your institution)                                                                                                                                                                                                                                                                                                                                                                                                     |  |  |  |  |  |  |
|-----------------------------------------------------------|--------------------------------------------------------------------------------------------------------------------------------------------------------------------------------|-----------------------------------------------------------------------------------------------------------------------------------------------------------------------------------------------------------------------------------------------------------------------------------------------------------------------------------------------------------------------------------------------------------------------------------------------------------------------------------------|--|--|--|--|--|--|
| <b>Time frame: Since the initial planning of the work</b> |                                                                                                                                                                                |                                                                                                                                                                                                                                                                                                                                                                                                                                                                                         |  |  |  |  |  |  |
| <b>1</b>                                                  | All support for the present manuscript (e.g., funding, provision of study materials, medical writing, article processing charges, etc.)<br><b>No time limit for this item.</b> | <div style="margin-bottom: 10px;"><input checked="" type="checkbox"/> <b>None</b></div> <table border="1" style="width: 100%; border-collapse: collapse;"> <tr><td style="height: 20px;"></td><td style="height: 20px;"></td></tr> <tr><td style="height: 20px;"></td><td style="height: 20px;"></td></tr> <tr><td style="height: 20px;"></td><td style="height: 20px;"></td></tr> </table> <div style="font-size: small; color: gray;">Click the tab key to add additional rows.</div> |  |  |  |  |  |  |
|                                                           |                                                                                                                                                                                |                                                                                                                                                                                                                                                                                                                                                                                                                                                                                         |  |  |  |  |  |  |
|                                                           |                                                                                                                                                                                |                                                                                                                                                                                                                                                                                                                                                                                                                                                                                         |  |  |  |  |  |  |
|                                                           |                                                                                                                                                                                |                                                                                                                                                                                                                                                                                                                                                                                                                                                                                         |  |  |  |  |  |  |
| <b>Time frame: past 36 months</b>                         |                                                                                                                                                                                |                                                                                                                                                                                                                                                                                                                                                                                                                                                                                         |  |  |  |  |  |  |
| <b>2</b>                                                  | Grants or contracts from any entity (if not indicated in item #1 above).                                                                                                       | <div style="margin-bottom: 10px;"><input checked="" type="checkbox"/> <b>None</b></div> <table border="1" style="width: 100%; border-collapse: collapse;"> <tr><td style="height: 20px;"></td><td style="height: 20px;"></td></tr> <tr><td style="height: 20px;"></td><td style="height: 20px;"></td></tr> <tr><td style="height: 20px;"></td><td style="height: 20px;"></td></tr> </table>                                                                                             |  |  |  |  |  |  |
|                                                           |                                                                                                                                                                                |                                                                                                                                                                                                                                                                                                                                                                                                                                                                                         |  |  |  |  |  |  |
|                                                           |                                                                                                                                                                                |                                                                                                                                                                                                                                                                                                                                                                                                                                                                                         |  |  |  |  |  |  |
|                                                           |                                                                                                                                                                                |                                                                                                                                                                                                                                                                                                                                                                                                                                                                                         |  |  |  |  |  |  |
| <b>3</b>                                                  | Royalties or licenses                                                                                                                                                          | <div style="margin-bottom: 10px;"><input checked="" type="checkbox"/> <b>None</b></div> <table border="1" style="width: 100%; border-collapse: collapse;"> <tr><td style="height: 20px;"></td><td style="height: 20px;"></td></tr> <tr><td style="height: 20px;"></td><td style="height: 20px;"></td></tr> <tr><td style="height: 20px;"></td><td style="height: 20px;"></td></tr> </table>                                                                                             |  |  |  |  |  |  |
|                                                           |                                                                                                                                                                                |                                                                                                                                                                                                                                                                                                                                                                                                                                                                                         |  |  |  |  |  |  |
|                                                           |                                                                                                                                                                                |                                                                                                                                                                                                                                                                                                                                                                                                                                                                                         |  |  |  |  |  |  |
|                                                           |                                                                                                                                                                                |                                                                                                                                                                                                                                                                                                                                                                                                                                                                                         |  |  |  |  |  |  |

|    |                                                                                                              |                                                                                                                                                                                                                          |  |  |  |  |  |  |  |  |
|----|--------------------------------------------------------------------------------------------------------------|--------------------------------------------------------------------------------------------------------------------------------------------------------------------------------------------------------------------------|--|--|--|--|--|--|--|--|
| 4  | Consulting fees                                                                                              | <input checked="" type="checkbox"/> <b>None</b> <table border="1" data-bbox="368 207 1500 344"> <tr><td></td><td></td></tr> <tr><td></td><td></td></tr> <tr><td></td><td></td></tr> <tr><td></td><td></td></tr> </table> |  |  |  |  |  |  |  |  |
|    |                                                                                                              |                                                                                                                                                                                                                          |  |  |  |  |  |  |  |  |
|    |                                                                                                              |                                                                                                                                                                                                                          |  |  |  |  |  |  |  |  |
|    |                                                                                                              |                                                                                                                                                                                                                          |  |  |  |  |  |  |  |  |
|    |                                                                                                              |                                                                                                                                                                                                                          |  |  |  |  |  |  |  |  |
| 5  | Payment or honoraria for lectures, presentations, speakers bureaus, manuscript writing or educational events | <input checked="" type="checkbox"/> <b>None</b> <table border="1" data-bbox="368 495 1500 598"> <tr><td></td><td></td></tr> <tr><td></td><td></td></tr> <tr><td></td><td></td></tr> </table>                             |  |  |  |  |  |  |  |  |
|    |                                                                                                              |                                                                                                                                                                                                                          |  |  |  |  |  |  |  |  |
|    |                                                                                                              |                                                                                                                                                                                                                          |  |  |  |  |  |  |  |  |
|    |                                                                                                              |                                                                                                                                                                                                                          |  |  |  |  |  |  |  |  |
| 6  | Payment for expert testimony                                                                                 | <input checked="" type="checkbox"/> <b>None</b> <table border="1" data-bbox="368 835 1500 938"> <tr><td></td><td></td></tr> <tr><td></td><td></td></tr> <tr><td></td><td></td></tr> </table>                             |  |  |  |  |  |  |  |  |
|    |                                                                                                              |                                                                                                                                                                                                                          |  |  |  |  |  |  |  |  |
|    |                                                                                                              |                                                                                                                                                                                                                          |  |  |  |  |  |  |  |  |
|    |                                                                                                              |                                                                                                                                                                                                                          |  |  |  |  |  |  |  |  |
| 7  | Support for attending meetings and/or travel                                                                 | <input checked="" type="checkbox"/> <b>None</b> <table border="1" data-bbox="368 1092 1500 1194"> <tr><td></td><td></td></tr> <tr><td></td><td></td></tr> <tr><td></td><td></td></tr> </table>                           |  |  |  |  |  |  |  |  |
|    |                                                                                                              |                                                                                                                                                                                                                          |  |  |  |  |  |  |  |  |
|    |                                                                                                              |                                                                                                                                                                                                                          |  |  |  |  |  |  |  |  |
|    |                                                                                                              |                                                                                                                                                                                                                          |  |  |  |  |  |  |  |  |
| 8  | Patents planned, issued or pending                                                                           | <input checked="" type="checkbox"/> <b>None</b> <table border="1" data-bbox="368 1348 1500 1451"> <tr><td></td><td></td></tr> <tr><td></td><td></td></tr> <tr><td></td><td></td></tr> </table>                           |  |  |  |  |  |  |  |  |
|    |                                                                                                              |                                                                                                                                                                                                                          |  |  |  |  |  |  |  |  |
|    |                                                                                                              |                                                                                                                                                                                                                          |  |  |  |  |  |  |  |  |
|    |                                                                                                              |                                                                                                                                                                                                                          |  |  |  |  |  |  |  |  |
| 9  | Participation on a Data Safety Monitoring Board or Advisory Board                                            | <input checked="" type="checkbox"/> <b>None</b> <table border="1" data-bbox="368 1604 1500 1707"> <tr><td></td><td></td></tr> <tr><td></td><td></td></tr> <tr><td></td><td></td></tr> </table>                           |  |  |  |  |  |  |  |  |
|    |                                                                                                              |                                                                                                                                                                                                                          |  |  |  |  |  |  |  |  |
|    |                                                                                                              |                                                                                                                                                                                                                          |  |  |  |  |  |  |  |  |
|    |                                                                                                              |                                                                                                                                                                                                                          |  |  |  |  |  |  |  |  |
| 10 | Leadership or fiduciary role in other board, society, committee or                                           | <input checked="" type="checkbox"/> <b>None</b> <table border="1" data-bbox="368 1860 1500 1963"> <tr><td></td><td></td></tr> <tr><td></td><td></td></tr> <tr><td></td><td></td></tr> </table>                           |  |  |  |  |  |  |  |  |
|    |                                                                                                              |                                                                                                                                                                                                                          |  |  |  |  |  |  |  |  |
|    |                                                                                                              |                                                                                                                                                                                                                          |  |  |  |  |  |  |  |  |
|    |                                                                                                              |                                                                                                                                                                                                                          |  |  |  |  |  |  |  |  |



|                                                                                                                                                                                                                                                               |                                                                                                 |                                                 |  |
|---------------------------------------------------------------------------------------------------------------------------------------------------------------------------------------------------------------------------------------------------------------|-------------------------------------------------------------------------------------------------|-------------------------------------------------|--|
|                                                                                                                                                                                                                                                               | advocacy group,<br>paid or unpaid                                                               |                                                 |  |
| 11                                                                                                                                                                                                                                                            | Stock or stock<br>options                                                                       | <input checked="" type="checkbox"/> <b>None</b> |  |
|                                                                                                                                                                                                                                                               |                                                                                                 |                                                 |  |
|                                                                                                                                                                                                                                                               |                                                                                                 |                                                 |  |
|                                                                                                                                                                                                                                                               |                                                                                                 |                                                 |  |
| 12                                                                                                                                                                                                                                                            | Receipt of<br>equipment,<br>materials, drugs,<br>medical writing,<br>gifts or other<br>services | <input checked="" type="checkbox"/> <b>None</b> |  |
|                                                                                                                                                                                                                                                               |                                                                                                 |                                                 |  |
|                                                                                                                                                                                                                                                               |                                                                                                 |                                                 |  |
|                                                                                                                                                                                                                                                               |                                                                                                 |                                                 |  |
| 13                                                                                                                                                                                                                                                            | Other financial<br>or non-financial<br>interests                                                | <input checked="" type="checkbox"/> <b>None</b> |  |
|                                                                                                                                                                                                                                                               |                                                                                                 |                                                 |  |
|                                                                                                                                                                                                                                                               |                                                                                                 |                                                 |  |
|                                                                                                                                                                                                                                                               |                                                                                                 |                                                 |  |
| <p><b>Please place an "X" next to the following statement to indicate your agreement:</b></p> <p><input checked="" type="checkbox"/> I certify that I have answered every question and have not altered the wording of any of the questions on this form.</p> |                                                                                                 |                                                 |  |

## ICMJE DISCLOSURE FORM

**Date:** 12/9/2021

**Your Name:** Alex P Reiner

**Manuscript Title:** Clonal Hematopoiesis in Sickle Cell Disease

**Manuscript Number (if known):** 156060-JCI-CMED-RV-2

In the interest of transparency, we ask you to disclose all relationships/activities/interests listed below that are related to the content of your manuscript. "Related" means any relation with for-profit or not-for-profit third parties whose interests may be affected by the content of the manuscript. Disclosure represents a commitment to transparency and does not necessarily indicate a bias. If you are in doubt about whether to list a relationship/activity/interest, it is preferable that you do so.

The author's relationships/activities/interests should be defined broadly. For example, if your manuscript pertains to the epidemiology of hypertension, you should declare all relationships with manufacturers of antihypertensive medication, even if that medication is not mentioned in the manuscript.

In item #1 below, report all support for the work reported in this manuscript without time limit. For all other items, the time frame for disclosure is the past 36 months.

|                                                           |                                                                                                                                                                                | Name all entities with whom you have this relationship or indicate none (add rows as needed)                                                                                                                                                                                                                                                                                                                                       | Specifications/Comments (e.g., if payments were made to you or to your institution) |  |  |  |  |  |  |
|-----------------------------------------------------------|--------------------------------------------------------------------------------------------------------------------------------------------------------------------------------|------------------------------------------------------------------------------------------------------------------------------------------------------------------------------------------------------------------------------------------------------------------------------------------------------------------------------------------------------------------------------------------------------------------------------------|-------------------------------------------------------------------------------------|--|--|--|--|--|--|
| <b>Time frame: Since the initial planning of the work</b> |                                                                                                                                                                                |                                                                                                                                                                                                                                                                                                                                                                                                                                    |                                                                                     |  |  |  |  |  |  |
| <b>1</b>                                                  | All support for the present manuscript (e.g., funding, provision of study materials, medical writing, article processing charges, etc.)<br><b>No time limit for this item.</b> | <div style="display: flex; align-items: flex-start;"> <input checked="" type="checkbox"/> <b>None</b> <table border="1" style="margin-top: 10px; width: 100%; border-collapse: collapse;"> <tr><td style="height: 20px;"></td><td style="height: 20px;"></td></tr> <tr><td style="height: 20px;"></td><td style="height: 20px;"></td></tr> <tr><td style="height: 20px;"></td><td style="height: 20px;"></td></tr> </table> </div> |                                                                                     |  |  |  |  |  |  |
|                                                           |                                                                                                                                                                                |                                                                                                                                                                                                                                                                                                                                                                                                                                    |                                                                                     |  |  |  |  |  |  |
|                                                           |                                                                                                                                                                                |                                                                                                                                                                                                                                                                                                                                                                                                                                    |                                                                                     |  |  |  |  |  |  |
|                                                           |                                                                                                                                                                                |                                                                                                                                                                                                                                                                                                                                                                                                                                    |                                                                                     |  |  |  |  |  |  |
| <b>Time frame: past 36 months</b>                         |                                                                                                                                                                                |                                                                                                                                                                                                                                                                                                                                                                                                                                    |                                                                                     |  |  |  |  |  |  |
| <b>2</b>                                                  | Grants or contracts from any entity (if not indicated in item #1 above).                                                                                                       | <div style="display: flex; align-items: flex-start;"> <input checked="" type="checkbox"/> <b>None</b> <table border="1" style="margin-top: 10px; width: 100%; border-collapse: collapse;"> <tr><td style="height: 20px;"></td><td style="height: 20px;"></td></tr> <tr><td style="height: 20px;"></td><td style="height: 20px;"></td></tr> <tr><td style="height: 20px;"></td><td style="height: 20px;"></td></tr> </table> </div> |                                                                                     |  |  |  |  |  |  |
|                                                           |                                                                                                                                                                                |                                                                                                                                                                                                                                                                                                                                                                                                                                    |                                                                                     |  |  |  |  |  |  |
|                                                           |                                                                                                                                                                                |                                                                                                                                                                                                                                                                                                                                                                                                                                    |                                                                                     |  |  |  |  |  |  |
|                                                           |                                                                                                                                                                                |                                                                                                                                                                                                                                                                                                                                                                                                                                    |                                                                                     |  |  |  |  |  |  |
| <b>3</b>                                                  | Royalties or licenses                                                                                                                                                          | <div style="display: flex; align-items: flex-start;"> <input checked="" type="checkbox"/> <b>None</b> <table border="1" style="margin-top: 10px; width: 100%; border-collapse: collapse;"> <tr><td style="height: 20px;"></td><td style="height: 20px;"></td></tr> <tr><td style="height: 20px;"></td><td style="height: 20px;"></td></tr> <tr><td style="height: 20px;"></td><td style="height: 20px;"></td></tr> </table> </div> |                                                                                     |  |  |  |  |  |  |
|                                                           |                                                                                                                                                                                |                                                                                                                                                                                                                                                                                                                                                                                                                                    |                                                                                     |  |  |  |  |  |  |
|                                                           |                                                                                                                                                                                |                                                                                                                                                                                                                                                                                                                                                                                                                                    |                                                                                     |  |  |  |  |  |  |
|                                                           |                                                                                                                                                                                |                                                                                                                                                                                                                                                                                                                                                                                                                                    |                                                                                     |  |  |  |  |  |  |

|    |                                                                                                              |                                                                                                                                                                                                                          |  |  |  |  |  |  |  |  |
|----|--------------------------------------------------------------------------------------------------------------|--------------------------------------------------------------------------------------------------------------------------------------------------------------------------------------------------------------------------|--|--|--|--|--|--|--|--|
| 4  | Consulting fees                                                                                              | <input checked="" type="checkbox"/> <b>None</b> <table border="1" data-bbox="370 205 1507 342"> <tr><td></td><td></td></tr> <tr><td></td><td></td></tr> <tr><td></td><td></td></tr> <tr><td></td><td></td></tr> </table> |  |  |  |  |  |  |  |  |
|    |                                                                                                              |                                                                                                                                                                                                                          |  |  |  |  |  |  |  |  |
|    |                                                                                                              |                                                                                                                                                                                                                          |  |  |  |  |  |  |  |  |
|    |                                                                                                              |                                                                                                                                                                                                                          |  |  |  |  |  |  |  |  |
|    |                                                                                                              |                                                                                                                                                                                                                          |  |  |  |  |  |  |  |  |
| 5  | Payment or honoraria for lectures, presentations, speakers bureaus, manuscript writing or educational events | <input checked="" type="checkbox"/> <b>None</b> <table border="1" data-bbox="370 493 1507 596"> <tr><td></td><td></td></tr> <tr><td></td><td></td></tr> <tr><td></td><td></td></tr> </table>                             |  |  |  |  |  |  |  |  |
|    |                                                                                                              |                                                                                                                                                                                                                          |  |  |  |  |  |  |  |  |
|    |                                                                                                              |                                                                                                                                                                                                                          |  |  |  |  |  |  |  |  |
|    |                                                                                                              |                                                                                                                                                                                                                          |  |  |  |  |  |  |  |  |
| 6  | Payment for expert testimony                                                                                 | <input checked="" type="checkbox"/> <b>None</b> <table border="1" data-bbox="370 833 1507 936"> <tr><td></td><td></td></tr> <tr><td></td><td></td></tr> <tr><td></td><td></td></tr> </table>                             |  |  |  |  |  |  |  |  |
|    |                                                                                                              |                                                                                                                                                                                                                          |  |  |  |  |  |  |  |  |
|    |                                                                                                              |                                                                                                                                                                                                                          |  |  |  |  |  |  |  |  |
|    |                                                                                                              |                                                                                                                                                                                                                          |  |  |  |  |  |  |  |  |
| 7  | Support for attending meetings and/or travel                                                                 | <input checked="" type="checkbox"/> <b>None</b> <table border="1" data-bbox="370 1089 1507 1192"> <tr><td></td><td></td></tr> <tr><td></td><td></td></tr> <tr><td></td><td></td></tr> </table>                           |  |  |  |  |  |  |  |  |
|    |                                                                                                              |                                                                                                                                                                                                                          |  |  |  |  |  |  |  |  |
|    |                                                                                                              |                                                                                                                                                                                                                          |  |  |  |  |  |  |  |  |
|    |                                                                                                              |                                                                                                                                                                                                                          |  |  |  |  |  |  |  |  |
| 8  | Patents planned, issued or pending                                                                           | <input checked="" type="checkbox"/> <b>None</b> <table border="1" data-bbox="370 1346 1507 1449"> <tr><td></td><td></td></tr> <tr><td></td><td></td></tr> <tr><td></td><td></td></tr> </table>                           |  |  |  |  |  |  |  |  |
|    |                                                                                                              |                                                                                                                                                                                                                          |  |  |  |  |  |  |  |  |
|    |                                                                                                              |                                                                                                                                                                                                                          |  |  |  |  |  |  |  |  |
|    |                                                                                                              |                                                                                                                                                                                                                          |  |  |  |  |  |  |  |  |
| 9  | Participation on a Data Safety Monitoring Board or Advisory Board                                            | <input checked="" type="checkbox"/> <b>None</b> <table border="1" data-bbox="370 1602 1507 1705"> <tr><td></td><td></td></tr> <tr><td></td><td></td></tr> <tr><td></td><td></td></tr> </table>                           |  |  |  |  |  |  |  |  |
|    |                                                                                                              |                                                                                                                                                                                                                          |  |  |  |  |  |  |  |  |
|    |                                                                                                              |                                                                                                                                                                                                                          |  |  |  |  |  |  |  |  |
|    |                                                                                                              |                                                                                                                                                                                                                          |  |  |  |  |  |  |  |  |
| 10 | Leadership or fiduciary role in other board, society, committee or                                           | <input checked="" type="checkbox"/> <b>None</b> <table border="1" data-bbox="370 1858 1507 1961"> <tr><td></td><td></td></tr> <tr><td></td><td></td></tr> <tr><td></td><td></td></tr> </table>                           |  |  |  |  |  |  |  |  |
|    |                                                                                                              |                                                                                                                                                                                                                          |  |  |  |  |  |  |  |  |
|    |                                                                                                              |                                                                                                                                                                                                                          |  |  |  |  |  |  |  |  |
|    |                                                                                                              |                                                                                                                                                                                                                          |  |  |  |  |  |  |  |  |

|                                                                                                                                                                                                                                                               |                                                                                                 |                                                 |  |
|---------------------------------------------------------------------------------------------------------------------------------------------------------------------------------------------------------------------------------------------------------------|-------------------------------------------------------------------------------------------------|-------------------------------------------------|--|
|                                                                                                                                                                                                                                                               | advocacy group,<br>paid or unpaid                                                               |                                                 |  |
| 11                                                                                                                                                                                                                                                            | Stock or stock<br>options                                                                       | <input checked="" type="checkbox"/> <b>None</b> |  |
|                                                                                                                                                                                                                                                               |                                                                                                 |                                                 |  |
|                                                                                                                                                                                                                                                               |                                                                                                 |                                                 |  |
|                                                                                                                                                                                                                                                               |                                                                                                 |                                                 |  |
| 12                                                                                                                                                                                                                                                            | Receipt of<br>equipment,<br>materials, drugs,<br>medical writing,<br>gifts or other<br>services | <input checked="" type="checkbox"/> <b>None</b> |  |
|                                                                                                                                                                                                                                                               |                                                                                                 |                                                 |  |
|                                                                                                                                                                                                                                                               |                                                                                                 |                                                 |  |
|                                                                                                                                                                                                                                                               |                                                                                                 |                                                 |  |
| 13                                                                                                                                                                                                                                                            | Other financial<br>or non-financial<br>interests                                                | <input checked="" type="checkbox"/> <b>None</b> |  |
|                                                                                                                                                                                                                                                               |                                                                                                 |                                                 |  |
|                                                                                                                                                                                                                                                               |                                                                                                 |                                                 |  |
|                                                                                                                                                                                                                                                               |                                                                                                 |                                                 |  |
| <p><b>Please place an "X" next to the following statement to indicate your agreement:</b></p> <p><input checked="" type="checkbox"/> I certify that I have answered every question and have not altered the wording of any of the questions on this form.</p> |                                                                                                 |                                                 |  |

## ICMJE DISCLOSURE FORM

**Date:** 12/12/2021

**Your Name:** Gonçalo R. Abecasis

**Manuscript Title:** Clonal Hematopoiesis in Sickle Cell Disease

**Manuscript Number (if known):** 156060-JCI-CMED-RV-2

In the interest of transparency, we ask you to disclose all relationships/activities/interests listed below that are related to the content of your manuscript. "Related" means any relation with for-profit or not-for-profit third parties whose interests may be affected by the content of the manuscript. Disclosure represents a commitment to transparency and does not necessarily indicate a bias. If you are in doubt about whether to list a relationship/activity/interest, it is preferable that you do so.

The author's relationships/activities/interests should be defined broadly. For example, if your manuscript pertains to the epidemiology of hypertension, you should declare all relationships with manufacturers of antihypertensive medication, even if that medication is not mentioned in the manuscript.

In item #1 below, report all support for the work reported in this manuscript without time limit. For all other items, the time frame for disclosure is the past 36 months.

|                                                           |                                                                                                                                                                                | Name all entities with whom you have this relationship or indicate none (add rows as needed)                                                                                                                                                                                                                                                                                                                                       | Specifications/Comments (e.g., if payments were made to you or to your institution) |  |  |  |  |  |  |
|-----------------------------------------------------------|--------------------------------------------------------------------------------------------------------------------------------------------------------------------------------|------------------------------------------------------------------------------------------------------------------------------------------------------------------------------------------------------------------------------------------------------------------------------------------------------------------------------------------------------------------------------------------------------------------------------------|-------------------------------------------------------------------------------------|--|--|--|--|--|--|
| <b>Time frame: Since the initial planning of the work</b> |                                                                                                                                                                                |                                                                                                                                                                                                                                                                                                                                                                                                                                    |                                                                                     |  |  |  |  |  |  |
| <b>1</b>                                                  | All support for the present manuscript (e.g., funding, provision of study materials, medical writing, article processing charges, etc.)<br><b>No time limit for this item.</b> | <div style="display: flex; align-items: flex-start;"> <input checked="" type="checkbox"/> <b>None</b> <table border="1" style="margin-top: 10px; width: 100%; border-collapse: collapse;"> <tr><td style="height: 20px;"></td><td style="height: 20px;"></td></tr> <tr><td style="height: 20px;"></td><td style="height: 20px;"></td></tr> <tr><td style="height: 20px;"></td><td style="height: 20px;"></td></tr> </table> </div> |                                                                                     |  |  |  |  |  |  |
|                                                           |                                                                                                                                                                                |                                                                                                                                                                                                                                                                                                                                                                                                                                    |                                                                                     |  |  |  |  |  |  |
|                                                           |                                                                                                                                                                                |                                                                                                                                                                                                                                                                                                                                                                                                                                    |                                                                                     |  |  |  |  |  |  |
|                                                           |                                                                                                                                                                                |                                                                                                                                                                                                                                                                                                                                                                                                                                    |                                                                                     |  |  |  |  |  |  |
| <b>Time frame: past 36 months</b>                         |                                                                                                                                                                                |                                                                                                                                                                                                                                                                                                                                                                                                                                    |                                                                                     |  |  |  |  |  |  |
| <b>2</b>                                                  | Grants or contracts from any entity (if not indicated in item #1 above).                                                                                                       | <div style="display: flex; align-items: flex-start;"> <input checked="" type="checkbox"/> <b>None</b> <table border="1" style="margin-top: 10px; width: 100%; border-collapse: collapse;"> <tr><td style="height: 20px;"></td><td style="height: 20px;"></td></tr> <tr><td style="height: 20px;"></td><td style="height: 20px;"></td></tr> <tr><td style="height: 20px;"></td><td style="height: 20px;"></td></tr> </table> </div> |                                                                                     |  |  |  |  |  |  |
|                                                           |                                                                                                                                                                                |                                                                                                                                                                                                                                                                                                                                                                                                                                    |                                                                                     |  |  |  |  |  |  |
|                                                           |                                                                                                                                                                                |                                                                                                                                                                                                                                                                                                                                                                                                                                    |                                                                                     |  |  |  |  |  |  |
|                                                           |                                                                                                                                                                                |                                                                                                                                                                                                                                                                                                                                                                                                                                    |                                                                                     |  |  |  |  |  |  |
| <b>3</b>                                                  | Royalties or licenses                                                                                                                                                          | <div style="display: flex; align-items: flex-start;"> <input checked="" type="checkbox"/> <b>None</b> <table border="1" style="margin-top: 10px; width: 100%; border-collapse: collapse;"> <tr><td style="height: 20px;"></td><td style="height: 20px;"></td></tr> <tr><td style="height: 20px;"></td><td style="height: 20px;"></td></tr> <tr><td style="height: 20px;"></td><td style="height: 20px;"></td></tr> </table> </div> |                                                                                     |  |  |  |  |  |  |
|                                                           |                                                                                                                                                                                |                                                                                                                                                                                                                                                                                                                                                                                                                                    |                                                                                     |  |  |  |  |  |  |
|                                                           |                                                                                                                                                                                |                                                                                                                                                                                                                                                                                                                                                                                                                                    |                                                                                     |  |  |  |  |  |  |
|                                                           |                                                                                                                                                                                |                                                                                                                                                                                                                                                                                                                                                                                                                                    |                                                                                     |  |  |  |  |  |  |

|                       |                                                                                                              |                                                                                                                                                                                             |                       |  |  |  |  |  |  |  |
|-----------------------|--------------------------------------------------------------------------------------------------------------|---------------------------------------------------------------------------------------------------------------------------------------------------------------------------------------------|-----------------------|--|--|--|--|--|--|--|
| 4                     | Consulting fees                                                                                              | <input checked="" type="checkbox"/> <b>None</b> <table border="1"> <tr><td></td><td></td></tr> <tr><td></td><td></td></tr> <tr><td></td><td></td></tr> <tr><td></td><td></td></tr> </table> |                       |  |  |  |  |  |  |  |
|                       |                                                                                                              |                                                                                                                                                                                             |                       |  |  |  |  |  |  |  |
|                       |                                                                                                              |                                                                                                                                                                                             |                       |  |  |  |  |  |  |  |
|                       |                                                                                                              |                                                                                                                                                                                             |                       |  |  |  |  |  |  |  |
|                       |                                                                                                              |                                                                                                                                                                                             |                       |  |  |  |  |  |  |  |
| 5                     | Payment or honoraria for lectures, presentations, speakers bureaus, manuscript writing or educational events | <input checked="" type="checkbox"/> <b>None</b> <table border="1"> <tr><td></td><td></td></tr> <tr><td></td><td></td></tr> <tr><td></td><td></td></tr> </table>                             |                       |  |  |  |  |  |  |  |
|                       |                                                                                                              |                                                                                                                                                                                             |                       |  |  |  |  |  |  |  |
|                       |                                                                                                              |                                                                                                                                                                                             |                       |  |  |  |  |  |  |  |
|                       |                                                                                                              |                                                                                                                                                                                             |                       |  |  |  |  |  |  |  |
| 6                     | Payment for expert testimony                                                                                 | <input checked="" type="checkbox"/> <b>None</b> <table border="1"> <tr><td></td><td></td></tr> <tr><td></td><td></td></tr> <tr><td></td><td></td></tr> </table>                             |                       |  |  |  |  |  |  |  |
|                       |                                                                                                              |                                                                                                                                                                                             |                       |  |  |  |  |  |  |  |
|                       |                                                                                                              |                                                                                                                                                                                             |                       |  |  |  |  |  |  |  |
|                       |                                                                                                              |                                                                                                                                                                                             |                       |  |  |  |  |  |  |  |
| 7                     | Support for attending meetings and/or travel                                                                 | <input checked="" type="checkbox"/> <b>None</b> <table border="1"> <tr><td></td><td></td></tr> <tr><td></td><td></td></tr> <tr><td></td><td></td></tr> </table>                             |                       |  |  |  |  |  |  |  |
|                       |                                                                                                              |                                                                                                                                                                                             |                       |  |  |  |  |  |  |  |
|                       |                                                                                                              |                                                                                                                                                                                             |                       |  |  |  |  |  |  |  |
|                       |                                                                                                              |                                                                                                                                                                                             |                       |  |  |  |  |  |  |  |
| 8                     | Patents planned, issued or pending                                                                           | <input checked="" type="checkbox"/> <b>None</b> <table border="1"> <tr><td></td><td></td></tr> <tr><td></td><td></td></tr> <tr><td></td><td></td></tr> </table>                             |                       |  |  |  |  |  |  |  |
|                       |                                                                                                              |                                                                                                                                                                                             |                       |  |  |  |  |  |  |  |
|                       |                                                                                                              |                                                                                                                                                                                             |                       |  |  |  |  |  |  |  |
|                       |                                                                                                              |                                                                                                                                                                                             |                       |  |  |  |  |  |  |  |
| 9                     | Participation on a Data Safety Monitoring Board or Advisory Board                                            | <input checked="" type="checkbox"/> <b>None</b> <table border="1"> <tr><td></td><td></td></tr> <tr><td></td><td></td></tr> <tr><td></td><td></td></tr> </table>                             |                       |  |  |  |  |  |  |  |
|                       |                                                                                                              |                                                                                                                                                                                             |                       |  |  |  |  |  |  |  |
|                       |                                                                                                              |                                                                                                                                                                                             |                       |  |  |  |  |  |  |  |
|                       |                                                                                                              |                                                                                                                                                                                             |                       |  |  |  |  |  |  |  |
| 10                    | Leadership or fiduciary role in other board, society, committee or                                           | <input type="checkbox"/> <b>None</b> <table border="1"> <tr><td>Employee of Regeneron</td><td></td></tr> <tr><td></td><td></td></tr> <tr><td></td><td></td></tr> </table>                   | Employee of Regeneron |  |  |  |  |  |  |  |
| Employee of Regeneron |                                                                                                              |                                                                                                                                                                                             |                       |  |  |  |  |  |  |  |
|                       |                                                                                                              |                                                                                                                                                                                             |                       |  |  |  |  |  |  |  |
|                       |                                                                                                              |                                                                                                                                                                                             |                       |  |  |  |  |  |  |  |

|                                                                                                                                                                                                                                                               |                                                                                                 |                                                 |  |
|---------------------------------------------------------------------------------------------------------------------------------------------------------------------------------------------------------------------------------------------------------------|-------------------------------------------------------------------------------------------------|-------------------------------------------------|--|
|                                                                                                                                                                                                                                                               | advocacy group,<br>paid or unpaid                                                               |                                                 |  |
| 11                                                                                                                                                                                                                                                            | Stock or stock<br>options                                                                       | <input type="checkbox"/> <b>None</b>            |  |
|                                                                                                                                                                                                                                                               |                                                                                                 | Stockholder of Regeneron                        |  |
|                                                                                                                                                                                                                                                               |                                                                                                 |                                                 |  |
|                                                                                                                                                                                                                                                               |                                                                                                 |                                                 |  |
| 12                                                                                                                                                                                                                                                            | Receipt of<br>equipment,<br>materials, drugs,<br>medical writing,<br>gifts or other<br>services | <input checked="" type="checkbox"/> <b>None</b> |  |
|                                                                                                                                                                                                                                                               |                                                                                                 |                                                 |  |
|                                                                                                                                                                                                                                                               |                                                                                                 |                                                 |  |
|                                                                                                                                                                                                                                                               |                                                                                                 |                                                 |  |
| 13                                                                                                                                                                                                                                                            | Other financial<br>or non-financial<br>interests                                                | <input checked="" type="checkbox"/> <b>None</b> |  |
|                                                                                                                                                                                                                                                               |                                                                                                 |                                                 |  |
|                                                                                                                                                                                                                                                               |                                                                                                 |                                                 |  |
|                                                                                                                                                                                                                                                               |                                                                                                 |                                                 |  |
| <p><b>Please place an "X" next to the following statement to indicate your agreement:</b></p> <p><input checked="" type="checkbox"/> I certify that I have answered every question and have not altered the wording of any of the questions on this form.</p> |                                                                                                 |                                                 |  |

## ICMJE DISCLOSURE FORM

**Date:** 12/10/2021

**Your Name:** David A. Williams, MD

**Manuscript Title:** Clonal Hematopoiesis in Sickle Cell Disease

**Manuscript Number (if known):** 156060-JCI-CMED-RV-2

In the interest of transparency, we ask you to disclose all relationships/activities/interests listed below that are related to the content of your manuscript. "Related" means any relation with for-profit or not-for-profit third parties whose interests may be affected by the content of the manuscript. Disclosure represents a commitment to transparency and does not necessarily indicate a bias. If you are in doubt about whether to list a relationship/activity/interest, it is preferable that you do so.

The author's relationships/activities/interests should be defined broadly. For example, if your manuscript pertains to the epidemiology of hypertension, you should declare all relationships with manufacturers of antihypertensive medication, even if that medication is not mentioned in the manuscript.

In item #1 below, report all support for the work reported in this manuscript without time limit. For all other items, the time frame for disclosure is the past 36 months.

|                                                           | Name all entities with whom you have this relationship or indicate none (add rows as needed)                                                                                       | Specifications/Comments (e.g., if payments were made to you or to your institution)                                                                                                                                                                                                                                                                                                                                                                                                                                           |              |                                                           |                      |                                                                                                   |  |                                           |
|-----------------------------------------------------------|------------------------------------------------------------------------------------------------------------------------------------------------------------------------------------|-------------------------------------------------------------------------------------------------------------------------------------------------------------------------------------------------------------------------------------------------------------------------------------------------------------------------------------------------------------------------------------------------------------------------------------------------------------------------------------------------------------------------------|--------------|-----------------------------------------------------------|----------------------|---------------------------------------------------------------------------------------------------|--|-------------------------------------------|
| <b>Time frame: Since the initial planning of the work</b> |                                                                                                                                                                                    |                                                                                                                                                                                                                                                                                                                                                                                                                                                                                                                               |              |                                                           |                      |                                                                                                   |  |                                           |
| <b>1</b>                                                  | All support for the present manuscript (e.g., funding, provision of study materials, medical writing, article processing charges, etc.)<br><br><b>No time limit for this item.</b> | <div style="margin-bottom: 10px;"><input checked="" type="checkbox"/> <b>None</b></div> <table border="1" style="width: 100%; border-collapse: collapse;"> <tr><td style="height: 20px;"></td><td style="height: 20px;"></td></tr> <tr><td style="height: 20px;"></td><td style="height: 20px;"></td></tr> <tr><td style="height: 20px;"></td><td style="height: 20px; text-align: center;">Click the tab key to add additional rows.</td></tr> </table>                                                                      |              |                                                           |                      |                                                                                                   |  | Click the tab key to add additional rows. |
|                                                           |                                                                                                                                                                                    |                                                                                                                                                                                                                                                                                                                                                                                                                                                                                                                               |              |                                                           |                      |                                                                                                   |  |                                           |
|                                                           |                                                                                                                                                                                    |                                                                                                                                                                                                                                                                                                                                                                                                                                                                                                                               |              |                                                           |                      |                                                                                                   |  |                                           |
|                                                           | Click the tab key to add additional rows.                                                                                                                                          |                                                                                                                                                                                                                                                                                                                                                                                                                                                                                                                               |              |                                                           |                      |                                                                                                   |  |                                           |
| <b>Time frame: past 36 months</b>                         |                                                                                                                                                                                    |                                                                                                                                                                                                                                                                                                                                                                                                                                                                                                                               |              |                                                           |                      |                                                                                                   |  |                                           |
| <b>2</b>                                                  | Grants or contracts from any entity (if not indicated in item #1 above).                                                                                                           | <div style="margin-bottom: 10px;"><input type="checkbox"/> <b>None</b></div> <table border="1" style="width: 100%; border-collapse: collapse;"> <tr> <td style="width: 50%;">Bluebird bio</td><td style="width: 50%;">Prior research funding for research in hemoglobinopathies</td></tr> <tr> <td>Orchard Therapeutics</td><td>For X-SCID; provided GMP vector for clinical trial. Potential for future royalty/milestone income</td></tr> <tr> <td style="height: 20px;"></td><td style="height: 20px;"></td></tr> </table> | Bluebird bio | Prior research funding for research in hemoglobinopathies | Orchard Therapeutics | For X-SCID; provided GMP vector for clinical trial. Potential for future royalty/milestone income |  |                                           |
| Bluebird bio                                              | Prior research funding for research in hemoglobinopathies                                                                                                                          |                                                                                                                                                                                                                                                                                                                                                                                                                                                                                                                               |              |                                                           |                      |                                                                                                   |  |                                           |
| Orchard Therapeutics                                      | For X-SCID; provided GMP vector for clinical trial. Potential for future royalty/milestone income                                                                                  |                                                                                                                                                                                                                                                                                                                                                                                                                                                                                                                               |              |                                                           |                      |                                                                                                   |  |                                           |
|                                                           |                                                                                                                                                                                    |                                                                                                                                                                                                                                                                                                                                                                                                                                                                                                                               |              |                                                           |                      |                                                                                                   |  |                                           |



|              |                                                                                                                                                                                                                                                                                                                                             |                                                                                                                                                                                                                                                                                                                                                                                                                                                                                                                                                                                                                                                                                                                              |  |              |                                                                                                                                                                                                                                                                                                                                             |  |  |  |  |  |  |
|--------------|---------------------------------------------------------------------------------------------------------------------------------------------------------------------------------------------------------------------------------------------------------------------------------------------------------------------------------------------|------------------------------------------------------------------------------------------------------------------------------------------------------------------------------------------------------------------------------------------------------------------------------------------------------------------------------------------------------------------------------------------------------------------------------------------------------------------------------------------------------------------------------------------------------------------------------------------------------------------------------------------------------------------------------------------------------------------------------|--|--------------|---------------------------------------------------------------------------------------------------------------------------------------------------------------------------------------------------------------------------------------------------------------------------------------------------------------------------------------------|--|--|--|--|--|--|
| 3            | Royalties or licenses                                                                                                                                                                                                                                                                                                                       | <input type="checkbox"/> <b>None</b> <table border="1" data-bbox="391 205 1523 531"> <tr> <td data-bbox="391 205 963 457">Bluebird bio</td> <td data-bbox="963 205 1523 457">BCH licensed certain IP relevant to hemoglobinopathies to bluebird bio. The current license includes the potential for future royalty/milestone income. Bluebird has indicated they will not pursue this as a clinical program and BCH is negotiating return of IP. Received payment in past through BCH institutional licensing agreement.</td> </tr> <tr> <td data-bbox="391 457 963 489"></td> <td data-bbox="963 457 1523 489"></td> </tr> <tr> <td data-bbox="391 489 963 520"></td> <td data-bbox="963 489 1523 520"></td> </tr> </table> |  | Bluebird bio | BCH licensed certain IP relevant to hemoglobinopathies to bluebird bio. The current license includes the potential for future royalty/milestone income. Bluebird has indicated they will not pursue this as a clinical program and BCH is negotiating return of IP. Received payment in past through BCH institutional licensing agreement. |  |  |  |  |  |  |
| Bluebird bio | BCH licensed certain IP relevant to hemoglobinopathies to bluebird bio. The current license includes the potential for future royalty/milestone income. Bluebird has indicated they will not pursue this as a clinical program and BCH is negotiating return of IP. Received payment in past through BCH institutional licensing agreement. |                                                                                                                                                                                                                                                                                                                                                                                                                                                                                                                                                                                                                                                                                                                              |  |              |                                                                                                                                                                                                                                                                                                                                             |  |  |  |  |  |  |
|              |                                                                                                                                                                                                                                                                                                                                             |                                                                                                                                                                                                                                                                                                                                                                                                                                                                                                                                                                                                                                                                                                                              |  |              |                                                                                                                                                                                                                                                                                                                                             |  |  |  |  |  |  |
|              |                                                                                                                                                                                                                                                                                                                                             |                                                                                                                                                                                                                                                                                                                                                                                                                                                                                                                                                                                                                                                                                                                              |  |              |                                                                                                                                                                                                                                                                                                                                             |  |  |  |  |  |  |
| 4            | Consulting fees                                                                                                                                                                                                                                                                                                                             | <input checked="" type="checkbox"/> <b>None</b> <table border="1" data-bbox="391 682 1523 821"> <tr><td data-bbox="391 682 963 714"></td><td data-bbox="963 682 1523 714"></td></tr> <tr><td data-bbox="391 714 963 745"></td><td data-bbox="963 714 1523 745"></td></tr> <tr><td data-bbox="391 745 963 777"></td><td data-bbox="963 745 1523 777"></td></tr> <tr><td data-bbox="391 777 963 808"></td><td data-bbox="963 777 1523 808"></td></tr> </table>                                                                                                                                                                                                                                                                 |  |              |                                                                                                                                                                                                                                                                                                                                             |  |  |  |  |  |  |
|              |                                                                                                                                                                                                                                                                                                                                             |                                                                                                                                                                                                                                                                                                                                                                                                                                                                                                                                                                                                                                                                                                                              |  |              |                                                                                                                                                                                                                                                                                                                                             |  |  |  |  |  |  |
|              |                                                                                                                                                                                                                                                                                                                                             |                                                                                                                                                                                                                                                                                                                                                                                                                                                                                                                                                                                                                                                                                                                              |  |              |                                                                                                                                                                                                                                                                                                                                             |  |  |  |  |  |  |
|              |                                                                                                                                                                                                                                                                                                                                             |                                                                                                                                                                                                                                                                                                                                                                                                                                                                                                                                                                                                                                                                                                                              |  |              |                                                                                                                                                                                                                                                                                                                                             |  |  |  |  |  |  |
|              |                                                                                                                                                                                                                                                                                                                                             |                                                                                                                                                                                                                                                                                                                                                                                                                                                                                                                                                                                                                                                                                                                              |  |              |                                                                                                                                                                                                                                                                                                                                             |  |  |  |  |  |  |
| 5            | Payment or honoraria for lectures, presentations, speakers bureaus, manuscript writing or educational events                                                                                                                                                                                                                                | <input checked="" type="checkbox"/> <b>None</b> <table border="1" data-bbox="391 974 1523 1077"> <tr><td data-bbox="391 974 963 1005"></td><td data-bbox="963 974 1523 1005"></td></tr> <tr><td data-bbox="391 1005 963 1037"></td><td data-bbox="963 1005 1523 1037"></td></tr> <tr><td data-bbox="391 1037 963 1068"></td><td data-bbox="963 1037 1523 1068"></td></tr> </table>                                                                                                                                                                                                                                                                                                                                           |  |              |                                                                                                                                                                                                                                                                                                                                             |  |  |  |  |  |  |
|              |                                                                                                                                                                                                                                                                                                                                             |                                                                                                                                                                                                                                                                                                                                                                                                                                                                                                                                                                                                                                                                                                                              |  |              |                                                                                                                                                                                                                                                                                                                                             |  |  |  |  |  |  |
|              |                                                                                                                                                                                                                                                                                                                                             |                                                                                                                                                                                                                                                                                                                                                                                                                                                                                                                                                                                                                                                                                                                              |  |              |                                                                                                                                                                                                                                                                                                                                             |  |  |  |  |  |  |
|              |                                                                                                                                                                                                                                                                                                                                             |                                                                                                                                                                                                                                                                                                                                                                                                                                                                                                                                                                                                                                                                                                                              |  |              |                                                                                                                                                                                                                                                                                                                                             |  |  |  |  |  |  |
| 6            | Payment for expert testimony                                                                                                                                                                                                                                                                                                                | <input checked="" type="checkbox"/> <b>None</b> <table border="1" data-bbox="391 1312 1523 1415"> <tr><td data-bbox="391 1312 963 1344"></td><td data-bbox="963 1312 1523 1344"></td></tr> <tr><td data-bbox="391 1344 963 1375"></td><td data-bbox="963 1344 1523 1375"></td></tr> <tr><td data-bbox="391 1375 963 1407"></td><td data-bbox="963 1375 1523 1407"></td></tr> </table>                                                                                                                                                                                                                                                                                                                                        |  |              |                                                                                                                                                                                                                                                                                                                                             |  |  |  |  |  |  |
|              |                                                                                                                                                                                                                                                                                                                                             |                                                                                                                                                                                                                                                                                                                                                                                                                                                                                                                                                                                                                                                                                                                              |  |              |                                                                                                                                                                                                                                                                                                                                             |  |  |  |  |  |  |
|              |                                                                                                                                                                                                                                                                                                                                             |                                                                                                                                                                                                                                                                                                                                                                                                                                                                                                                                                                                                                                                                                                                              |  |              |                                                                                                                                                                                                                                                                                                                                             |  |  |  |  |  |  |
|              |                                                                                                                                                                                                                                                                                                                                             |                                                                                                                                                                                                                                                                                                                                                                                                                                                                                                                                                                                                                                                                                                                              |  |              |                                                                                                                                                                                                                                                                                                                                             |  |  |  |  |  |  |
| 7            | Support for attending meetings and/or travel                                                                                                                                                                                                                                                                                                | <input checked="" type="checkbox"/> <b>None</b> <table border="1" data-bbox="391 1570 1523 1673"> <tr><td data-bbox="391 1570 963 1602"></td><td data-bbox="963 1570 1523 1602"></td></tr> <tr><td data-bbox="391 1602 963 1633"></td><td data-bbox="963 1602 1523 1633"></td></tr> <tr><td data-bbox="391 1633 963 1665"></td><td data-bbox="963 1633 1523 1665"></td></tr> </table>                                                                                                                                                                                                                                                                                                                                        |  |              |                                                                                                                                                                                                                                                                                                                                             |  |  |  |  |  |  |
|              |                                                                                                                                                                                                                                                                                                                                             |                                                                                                                                                                                                                                                                                                                                                                                                                                                                                                                                                                                                                                                                                                                              |  |              |                                                                                                                                                                                                                                                                                                                                             |  |  |  |  |  |  |
|              |                                                                                                                                                                                                                                                                                                                                             |                                                                                                                                                                                                                                                                                                                                                                                                                                                                                                                                                                                                                                                                                                                              |  |              |                                                                                                                                                                                                                                                                                                                                             |  |  |  |  |  |  |
|              |                                                                                                                                                                                                                                                                                                                                             |                                                                                                                                                                                                                                                                                                                                                                                                                                                                                                                                                                                                                                                                                                                              |  |              |                                                                                                                                                                                                                                                                                                                                             |  |  |  |  |  |  |
| 8            | Patents planned, issued or pending                                                                                                                                                                                                                                                                                                          | <input checked="" type="checkbox"/> <b>None</b> <table border="1" data-bbox="391 1829 1523 1929"> <tr><td data-bbox="391 1829 963 1860"></td><td data-bbox="963 1829 1523 1860"></td></tr> <tr><td data-bbox="391 1860 963 1892"></td><td data-bbox="963 1860 1523 1892"></td></tr> <tr><td data-bbox="391 1892 963 1923"></td><td data-bbox="963 1892 1523 1923"></td></tr> </table>                                                                                                                                                                                                                                                                                                                                        |  |              |                                                                                                                                                                                                                                                                                                                                             |  |  |  |  |  |  |
|              |                                                                                                                                                                                                                                                                                                                                             |                                                                                                                                                                                                                                                                                                                                                                                                                                                                                                                                                                                                                                                                                                                              |  |              |                                                                                                                                                                                                                                                                                                                                             |  |  |  |  |  |  |
|              |                                                                                                                                                                                                                                                                                                                                             |                                                                                                                                                                                                                                                                                                                                                                                                                                                                                                                                                                                                                                                                                                                              |  |              |                                                                                                                                                                                                                                                                                                                                             |  |  |  |  |  |  |
|              |                                                                                                                                                                                                                                                                                                                                             |                                                                                                                                                                                                                                                                                                                                                                                                                                                                                                                                                                                                                                                                                                                              |  |              |                                                                                                                                                                                                                                                                                                                                             |  |  |  |  |  |  |

|                                                |                                                                                                                      |                                                                                                                                                                                                                                                                                                                                                                                                                                                                                                                                                                                                                                                             |  |                      |                                                                   |          |                                                                                                                      |                                                |                                                       |                            |                           |  |  |  |  |
|------------------------------------------------|----------------------------------------------------------------------------------------------------------------------|-------------------------------------------------------------------------------------------------------------------------------------------------------------------------------------------------------------------------------------------------------------------------------------------------------------------------------------------------------------------------------------------------------------------------------------------------------------------------------------------------------------------------------------------------------------------------------------------------------------------------------------------------------------|--|----------------------|-------------------------------------------------------------------|----------|----------------------------------------------------------------------------------------------------------------------|------------------------------------------------|-------------------------------------------------------|----------------------------|---------------------------|--|--|--|--|
| 9                                              | Participation on a Data Safety Monitoring Board or Advisory Board                                                    | <input type="checkbox"/> <b>None</b> <table border="1" data-bbox="391 205 1523 342"> <tr> <td>Geneception</td> <td>Scientific Advisory Board</td> </tr> <tr> <td>Biomarin</td> <td>Insertion Site Advisory Board</td> </tr> <tr> <td>Bluebird Bio</td> <td>Insertion Site Analysis Advisory Board</td> </tr> <tr> <td>Beam Therapeutics</td> <td>Scientific Advisory Board</td> </tr> </table>                                                                                                                                                                                                                                                              |  | Geneception          | Scientific Advisory Board                                         | Biomarin | Insertion Site Advisory Board                                                                                        | Bluebird Bio                                   | Insertion Site Analysis Advisory Board                | Beam Therapeutics          | Scientific Advisory Board |  |  |  |  |
| Geneception                                    | Scientific Advisory Board                                                                                            |                                                                                                                                                                                                                                                                                                                                                                                                                                                                                                                                                                                                                                                             |  |                      |                                                                   |          |                                                                                                                      |                                                |                                                       |                            |                           |  |  |  |  |
| Biomarin                                       | Insertion Site Advisory Board                                                                                        |                                                                                                                                                                                                                                                                                                                                                                                                                                                                                                                                                                                                                                                             |  |                      |                                                                   |          |                                                                                                                      |                                                |                                                       |                            |                           |  |  |  |  |
| Bluebird Bio                                   | Insertion Site Analysis Advisory Board                                                                               |                                                                                                                                                                                                                                                                                                                                                                                                                                                                                                                                                                                                                                                             |  |                      |                                                                   |          |                                                                                                                      |                                                |                                                       |                            |                           |  |  |  |  |
| Beam Therapeutics                              | Scientific Advisory Board                                                                                            |                                                                                                                                                                                                                                                                                                                                                                                                                                                                                                                                                                                                                                                             |  |                      |                                                                   |          |                                                                                                                      |                                                |                                                       |                            |                           |  |  |  |  |
| 10                                             | Leadership or fiduciary role in other board, society, committee or advocacy group, paid or unpaid                    | <input type="checkbox"/> <b>None</b> <table border="1" data-bbox="391 495 1523 827"> <tr> <td>Orchard Therapeutics</td> <td>Co-founder and SAB, Orchard Therapeutics; SAB position ended 5/20</td> </tr> <tr> <td>Novartis</td> <td>Steering Committee, Novartis ETB115E2201 (eltrombopeg in pediatric aplastic anemia). Advisory fees donated to NAPAAC</td> </tr> <tr> <td>Alerion Biosciences (now licensed to Avro Bio)</td> <td>Co-Founder, potential for future milestones/royalties</td> </tr> <tr> <td>Emerging Therapy Solutions</td> <td>Chief Scientific Chair</td> </tr> <tr> <td></td> <td></td> </tr> <tr> <td></td> <td></td> </tr> </table> |  | Orchard Therapeutics | Co-founder and SAB, Orchard Therapeutics; SAB position ended 5/20 | Novartis | Steering Committee, Novartis ETB115E2201 (eltrombopeg in pediatric aplastic anemia). Advisory fees donated to NAPAAC | Alerion Biosciences (now licensed to Avro Bio) | Co-Founder, potential for future milestones/royalties | Emerging Therapy Solutions | Chief Scientific Chair    |  |  |  |  |
| Orchard Therapeutics                           | Co-founder and SAB, Orchard Therapeutics; SAB position ended 5/20                                                    |                                                                                                                                                                                                                                                                                                                                                                                                                                                                                                                                                                                                                                                             |  |                      |                                                                   |          |                                                                                                                      |                                                |                                                       |                            |                           |  |  |  |  |
| Novartis                                       | Steering Committee, Novartis ETB115E2201 (eltrombopeg in pediatric aplastic anemia). Advisory fees donated to NAPAAC |                                                                                                                                                                                                                                                                                                                                                                                                                                                                                                                                                                                                                                                             |  |                      |                                                                   |          |                                                                                                                      |                                                |                                                       |                            |                           |  |  |  |  |
| Alerion Biosciences (now licensed to Avro Bio) | Co-Founder, potential for future milestones/royalties                                                                |                                                                                                                                                                                                                                                                                                                                                                                                                                                                                                                                                                                                                                                             |  |                      |                                                                   |          |                                                                                                                      |                                                |                                                       |                            |                           |  |  |  |  |
| Emerging Therapy Solutions                     | Chief Scientific Chair                                                                                               |                                                                                                                                                                                                                                                                                                                                                                                                                                                                                                                                                                                                                                                             |  |                      |                                                                   |          |                                                                                                                      |                                                |                                                       |                            |                           |  |  |  |  |
|                                                |                                                                                                                      |                                                                                                                                                                                                                                                                                                                                                                                                                                                                                                                                                                                                                                                             |  |                      |                                                                   |          |                                                                                                                      |                                                |                                                       |                            |                           |  |  |  |  |
|                                                |                                                                                                                      |                                                                                                                                                                                                                                                                                                                                                                                                                                                                                                                                                                                                                                                             |  |                      |                                                                   |          |                                                                                                                      |                                                |                                                       |                            |                           |  |  |  |  |
| 11                                             | Stock or stock options                                                                                               | <input checked="" type="checkbox"/> <b>None</b> <table border="1" data-bbox="391 980 1523 1083"> <tr><td></td><td></td></tr> <tr><td></td><td></td></tr> <tr><td></td><td></td></tr> </table>                                                                                                                                                                                                                                                                                                                                                                                                                                                               |  |                      |                                                                   |          |                                                                                                                      |                                                |                                                       |                            |                           |  |  |  |  |
|                                                |                                                                                                                      |                                                                                                                                                                                                                                                                                                                                                                                                                                                                                                                                                                                                                                                             |  |                      |                                                                   |          |                                                                                                                      |                                                |                                                       |                            |                           |  |  |  |  |
|                                                |                                                                                                                      |                                                                                                                                                                                                                                                                                                                                                                                                                                                                                                                                                                                                                                                             |  |                      |                                                                   |          |                                                                                                                      |                                                |                                                       |                            |                           |  |  |  |  |
|                                                |                                                                                                                      |                                                                                                                                                                                                                                                                                                                                                                                                                                                                                                                                                                                                                                                             |  |                      |                                                                   |          |                                                                                                                      |                                                |                                                       |                            |                           |  |  |  |  |
| 12                                             | Receipt of equipment, materials, drugs, medical writing, gifts or other services                                     | <input type="checkbox"/> <b>None</b> <table border="1" data-bbox="391 1236 1523 1339"> <tr> <td>Bluebird Bio</td> <td>provided GMP vector for SCD clinical trial</td> </tr> <tr><td></td><td></td></tr> <tr><td></td><td></td></tr> </table>                                                                                                                                                                                                                                                                                                                                                                                                                |  | Bluebird Bio         | provided GMP vector for SCD clinical trial                        |          |                                                                                                                      |                                                |                                                       |                            |                           |  |  |  |  |
| Bluebird Bio                                   | provided GMP vector for SCD clinical trial                                                                           |                                                                                                                                                                                                                                                                                                                                                                                                                                                                                                                                                                                                                                                             |  |                      |                                                                   |          |                                                                                                                      |                                                |                                                       |                            |                           |  |  |  |  |
|                                                |                                                                                                                      |                                                                                                                                                                                                                                                                                                                                                                                                                                                                                                                                                                                                                                                             |  |                      |                                                                   |          |                                                                                                                      |                                                |                                                       |                            |                           |  |  |  |  |
|                                                |                                                                                                                      |                                                                                                                                                                                                                                                                                                                                                                                                                                                                                                                                                                                                                                                             |  |                      |                                                                   |          |                                                                                                                      |                                                |                                                       |                            |                           |  |  |  |  |
| 13                                             | Other financial or non-financial interests                                                                           | <input checked="" type="checkbox"/> <b>None</b> <table border="1" data-bbox="391 1495 1523 1598"> <tr><td></td><td></td></tr> <tr><td></td><td></td></tr> <tr><td></td><td></td></tr> </table>                                                                                                                                                                                                                                                                                                                                                                                                                                                              |  |                      |                                                                   |          |                                                                                                                      |                                                |                                                       |                            |                           |  |  |  |  |
|                                                |                                                                                                                      |                                                                                                                                                                                                                                                                                                                                                                                                                                                                                                                                                                                                                                                             |  |                      |                                                                   |          |                                                                                                                      |                                                |                                                       |                            |                           |  |  |  |  |
|                                                |                                                                                                                      |                                                                                                                                                                                                                                                                                                                                                                                                                                                                                                                                                                                                                                                             |  |                      |                                                                   |          |                                                                                                                      |                                                |                                                       |                            |                           |  |  |  |  |
|                                                |                                                                                                                      |                                                                                                                                                                                                                                                                                                                                                                                                                                                                                                                                                                                                                                                             |  |                      |                                                                   |          |                                                                                                                      |                                                |                                                       |                            |                           |  |  |  |  |

Please place an "X" next to the following statement to indicate your agreement:

☒ I certify that I have answered every question and have not altered the wording of any of the questions on this form.

## ICMJE DISCLOSURE FORM

**Date:** 12/9/2021

**Your Name:** Pradeep Natarajan

**Manuscript Title:** Clonal Hematopoiesis in Sickle Cell Disease

**Manuscript Number (if known):** 156060-JCI-CMED-RV-2

In the interest of transparency, we ask you to disclose all relationships/activities/interests listed below that are related to the content of your manuscript. "Related" means any relation with for-profit or not-for-profit third parties whose interests may be affected by the content of the manuscript. Disclosure represents a commitment to transparency and does not necessarily indicate a bias. If you are in doubt about whether to list a relationship/activity/interest, it is preferable that you do so.

The author's relationships/activities/interests should be defined broadly. For example, if your manuscript pertains to the epidemiology of hypertension, you should declare all relationships with manufacturers of antihypertensive medication, even if that medication is not mentioned in the manuscript.

In item #1 below, report all support for the work reported in this manuscript without time limit. For all other items, the time frame for disclosure is the past 36 months.

|                                                           | Name all entities with whom you have this relationship or indicate none (add rows as needed)                                                                                   | Specifications/Comments (e.g., if payments were made to you or to your institution)                                                                                                                                                                                                                                                                                                                                                                                                                                                                                                                                                                                                                                                                                                                                                                                                                                                                                                                                                                                                                                                                   |       |                         |           |                         |           |                         |                      |                         |                  |                         |             |                         |       |                         |                   |                         |          |                         |
|-----------------------------------------------------------|--------------------------------------------------------------------------------------------------------------------------------------------------------------------------------|-------------------------------------------------------------------------------------------------------------------------------------------------------------------------------------------------------------------------------------------------------------------------------------------------------------------------------------------------------------------------------------------------------------------------------------------------------------------------------------------------------------------------------------------------------------------------------------------------------------------------------------------------------------------------------------------------------------------------------------------------------------------------------------------------------------------------------------------------------------------------------------------------------------------------------------------------------------------------------------------------------------------------------------------------------------------------------------------------------------------------------------------------------|-------|-------------------------|-----------|-------------------------|-----------|-------------------------|----------------------|-------------------------|------------------|-------------------------|-------------|-------------------------|-------|-------------------------|-------------------|-------------------------|----------|-------------------------|
| <b>Time frame: Since the initial planning of the work</b> |                                                                                                                                                                                |                                                                                                                                                                                                                                                                                                                                                                                                                                                                                                                                                                                                                                                                                                                                                                                                                                                                                                                                                                                                                                                                                                                                                       |       |                         |           |                         |           |                         |                      |                         |                  |                         |             |                         |       |                         |                   |                         |          |                         |
| <b>1</b>                                                  | All support for the present manuscript (e.g., funding, provision of study materials, medical writing, article processing charges, etc.)<br><b>No time limit for this item.</b> | <div style="margin-bottom: 10px;"> <input checked="" type="checkbox"/> <b>None</b> </div> <table border="1" style="width: 100%; border-collapse: collapse;"> <tr><td style="height: 20px;"></td><td style="height: 20px;"></td></tr> <tr><td style="height: 20px;"></td><td style="height: 20px;"></td></tr> <tr><td style="height: 20px;"></td><td style="height: 20px;"></td></tr> </table> <div style="font-size: small; text-align: right; margin-top: 5px;">Click the tab key to add additional rows.</div>                                                                                                                                                                                                                                                                                                                                                                                                                                                                                                                                                                                                                                      |       |                         |           |                         |           |                         |                      |                         |                  |                         |             |                         |       |                         |                   |                         |          |                         |
|                                                           |                                                                                                                                                                                |                                                                                                                                                                                                                                                                                                                                                                                                                                                                                                                                                                                                                                                                                                                                                                                                                                                                                                                                                                                                                                                                                                                                                       |       |                         |           |                         |           |                         |                      |                         |                  |                         |             |                         |       |                         |                   |                         |          |                         |
|                                                           |                                                                                                                                                                                |                                                                                                                                                                                                                                                                                                                                                                                                                                                                                                                                                                                                                                                                                                                                                                                                                                                                                                                                                                                                                                                                                                                                                       |       |                         |           |                         |           |                         |                      |                         |                  |                         |             |                         |       |                         |                   |                         |          |                         |
|                                                           |                                                                                                                                                                                |                                                                                                                                                                                                                                                                                                                                                                                                                                                                                                                                                                                                                                                                                                                                                                                                                                                                                                                                                                                                                                                                                                                                                       |       |                         |           |                         |           |                         |                      |                         |                  |                         |             |                         |       |                         |                   |                         |          |                         |
| <b>Time frame: past 36 months</b>                         |                                                                                                                                                                                |                                                                                                                                                                                                                                                                                                                                                                                                                                                                                                                                                                                                                                                                                                                                                                                                                                                                                                                                                                                                                                                                                                                                                       |       |                         |           |                         |           |                         |                      |                         |                  |                         |             |                         |       |                         |                   |                         |          |                         |
| <b>2</b>                                                  | Grants or contracts from any entity (if not indicated in item #1 above).                                                                                                       | <div style="margin-bottom: 10px;"> <input type="checkbox"/> <b>None</b> </div> <table border="1" style="width: 100%; border-collapse: collapse;"> <tr><td style="height: 20px;">Amgen</td><td style="height: 20px;">Payments to institution</td></tr> <tr><td style="height: 20px;">NIH NIDDK</td><td style="height: 20px;">Payments to institution</td></tr> <tr><td style="height: 20px;">NIH NHLBI</td><td style="height: 20px;">Payments to institution</td></tr> <tr><td style="height: 20px;">Department of Energy</td><td style="height: 20px;">Payments to institution</td></tr> <tr><td style="height: 20px;">Fondation Leducq</td><td style="height: 20px;">Payments to institution</td></tr> <tr><td style="height: 20px;">AstraZeneca</td><td style="height: 20px;">Payments to institution</td></tr> <tr><td style="height: 20px;">Apple</td><td style="height: 20px;">Payments to institution</td></tr> <tr><td style="height: 20px;">Boston Scientific</td><td style="height: 20px;">Payments to institution</td></tr> <tr><td style="height: 20px;">Novartis</td><td style="height: 20px;">Payments to institution</td></tr> </table> | Amgen | Payments to institution | NIH NIDDK | Payments to institution | NIH NHLBI | Payments to institution | Department of Energy | Payments to institution | Fondation Leducq | Payments to institution | AstraZeneca | Payments to institution | Apple | Payments to institution | Boston Scientific | Payments to institution | Novartis | Payments to institution |
| Amgen                                                     | Payments to institution                                                                                                                                                        |                                                                                                                                                                                                                                                                                                                                                                                                                                                                                                                                                                                                                                                                                                                                                                                                                                                                                                                                                                                                                                                                                                                                                       |       |                         |           |                         |           |                         |                      |                         |                  |                         |             |                         |       |                         |                   |                         |          |                         |
| NIH NIDDK                                                 | Payments to institution                                                                                                                                                        |                                                                                                                                                                                                                                                                                                                                                                                                                                                                                                                                                                                                                                                                                                                                                                                                                                                                                                                                                                                                                                                                                                                                                       |       |                         |           |                         |           |                         |                      |                         |                  |                         |             |                         |       |                         |                   |                         |          |                         |
| NIH NHLBI                                                 | Payments to institution                                                                                                                                                        |                                                                                                                                                                                                                                                                                                                                                                                                                                                                                                                                                                                                                                                                                                                                                                                                                                                                                                                                                                                                                                                                                                                                                       |       |                         |           |                         |           |                         |                      |                         |                  |                         |             |                         |       |                         |                   |                         |          |                         |
| Department of Energy                                      | Payments to institution                                                                                                                                                        |                                                                                                                                                                                                                                                                                                                                                                                                                                                                                                                                                                                                                                                                                                                                                                                                                                                                                                                                                                                                                                                                                                                                                       |       |                         |           |                         |           |                         |                      |                         |                  |                         |             |                         |       |                         |                   |                         |          |                         |
| Fondation Leducq                                          | Payments to institution                                                                                                                                                        |                                                                                                                                                                                                                                                                                                                                                                                                                                                                                                                                                                                                                                                                                                                                                                                                                                                                                                                                                                                                                                                                                                                                                       |       |                         |           |                         |           |                         |                      |                         |                  |                         |             |                         |       |                         |                   |                         |          |                         |
| AstraZeneca                                               | Payments to institution                                                                                                                                                        |                                                                                                                                                                                                                                                                                                                                                                                                                                                                                                                                                                                                                                                                                                                                                                                                                                                                                                                                                                                                                                                                                                                                                       |       |                         |           |                         |           |                         |                      |                         |                  |                         |             |                         |       |                         |                   |                         |          |                         |
| Apple                                                     | Payments to institution                                                                                                                                                        |                                                                                                                                                                                                                                                                                                                                                                                                                                                                                                                                                                                                                                                                                                                                                                                                                                                                                                                                                                                                                                                                                                                                                       |       |                         |           |                         |           |                         |                      |                         |                  |                         |             |                         |       |                         |                   |                         |          |                         |
| Boston Scientific                                         | Payments to institution                                                                                                                                                        |                                                                                                                                                                                                                                                                                                                                                                                                                                                                                                                                                                                                                                                                                                                                                                                                                                                                                                                                                                                                                                                                                                                                                       |       |                         |           |                         |           |                         |                      |                         |                  |                         |             |                         |       |                         |                   |                         |          |                         |
| Novartis                                                  | Payments to institution                                                                                                                                                        |                                                                                                                                                                                                                                                                                                                                                                                                                                                                                                                                                                                                                                                                                                                                                                                                                                                                                                                                                                                                                                                                                                                                                       |       |                         |           |                         |           |                         |                      |                         |                  |                         |             |                         |       |                         |                   |                         |          |                         |

|                           |                                                                                                              |                                                                                                                                                                                                                                                                                                                                                                                                                                                                                                                                                                                           |  |          |                     |             |                     |                           |                     |           |                     |               |                     |          |                     |                 |                     |                |                     |
|---------------------------|--------------------------------------------------------------------------------------------------------------|-------------------------------------------------------------------------------------------------------------------------------------------------------------------------------------------------------------------------------------------------------------------------------------------------------------------------------------------------------------------------------------------------------------------------------------------------------------------------------------------------------------------------------------------------------------------------------------------|--|----------|---------------------|-------------|---------------------|---------------------------|---------------------|-----------|---------------------|---------------|---------------------|----------|---------------------|-----------------|---------------------|----------------|---------------------|
| 3                         | Royalties or licenses                                                                                        | <input checked="" type="checkbox"/> <b>None</b> <table border="1" data-bbox="370 205 1503 310"> <tr><td></td><td></td></tr> <tr><td></td><td></td></tr> <tr><td></td><td></td></tr> </table>                                                                                                                                                                                                                                                                                                                                                                                              |  |          |                     |             |                     |                           |                     |           |                     |               |                     |          |                     |                 |                     |                |                     |
|                           |                                                                                                              |                                                                                                                                                                                                                                                                                                                                                                                                                                                                                                                                                                                           |  |          |                     |             |                     |                           |                     |           |                     |               |                     |          |                     |                 |                     |                |                     |
|                           |                                                                                                              |                                                                                                                                                                                                                                                                                                                                                                                                                                                                                                                                                                                           |  |          |                     |             |                     |                           |                     |           |                     |               |                     |          |                     |                 |                     |                |                     |
|                           |                                                                                                              |                                                                                                                                                                                                                                                                                                                                                                                                                                                                                                                                                                                           |  |          |                     |             |                     |                           |                     |           |                     |               |                     |          |                     |                 |                     |                |                     |
| 4                         | Consulting fees                                                                                              | <input type="checkbox"/> <b>None</b> <table border="1" data-bbox="370 464 1503 737"> <tr><td>Apple</td><td>Payments made to me</td></tr> <tr><td>AstraZeneca</td><td>Payments made to me</td></tr> <tr><td>Black Stone Life Sciences</td><td>Payments made to me</td></tr> <tr><td>Genexwell</td><td>Payments made to me</td></tr> <tr><td>Foresite Labs</td><td>Payments made to me</td></tr> <tr><td>Novartis</td><td>Payments made to me</td></tr> <tr><td>Roche/Genentech</td><td>Payments made to me</td></tr> <tr><td>TenSixteen Bio</td><td>Payments made to me</td></tr> </table> |  | Apple    | Payments made to me | AstraZeneca | Payments made to me | Black Stone Life Sciences | Payments made to me | Genexwell | Payments made to me | Foresite Labs | Payments made to me | Novartis | Payments made to me | Roche/Genentech | Payments made to me | TenSixteen Bio | Payments made to me |
| Apple                     | Payments made to me                                                                                          |                                                                                                                                                                                                                                                                                                                                                                                                                                                                                                                                                                                           |  |          |                     |             |                     |                           |                     |           |                     |               |                     |          |                     |                 |                     |                |                     |
| AstraZeneca               | Payments made to me                                                                                          |                                                                                                                                                                                                                                                                                                                                                                                                                                                                                                                                                                                           |  |          |                     |             |                     |                           |                     |           |                     |               |                     |          |                     |                 |                     |                |                     |
| Black Stone Life Sciences | Payments made to me                                                                                          |                                                                                                                                                                                                                                                                                                                                                                                                                                                                                                                                                                                           |  |          |                     |             |                     |                           |                     |           |                     |               |                     |          |                     |                 |                     |                |                     |
| Genexwell                 | Payments made to me                                                                                          |                                                                                                                                                                                                                                                                                                                                                                                                                                                                                                                                                                                           |  |          |                     |             |                     |                           |                     |           |                     |               |                     |          |                     |                 |                     |                |                     |
| Foresite Labs             | Payments made to me                                                                                          |                                                                                                                                                                                                                                                                                                                                                                                                                                                                                                                                                                                           |  |          |                     |             |                     |                           |                     |           |                     |               |                     |          |                     |                 |                     |                |                     |
| Novartis                  | Payments made to me                                                                                          |                                                                                                                                                                                                                                                                                                                                                                                                                                                                                                                                                                                           |  |          |                     |             |                     |                           |                     |           |                     |               |                     |          |                     |                 |                     |                |                     |
| Roche/Genentech           | Payments made to me                                                                                          |                                                                                                                                                                                                                                                                                                                                                                                                                                                                                                                                                                                           |  |          |                     |             |                     |                           |                     |           |                     |               |                     |          |                     |                 |                     |                |                     |
| TenSixteen Bio            | Payments made to me                                                                                          |                                                                                                                                                                                                                                                                                                                                                                                                                                                                                                                                                                                           |  |          |                     |             |                     |                           |                     |           |                     |               |                     |          |                     |                 |                     |                |                     |
| 5                         | Payment or honoraria for lectures, presentations, speakers bureaus, manuscript writing or educational events | <input type="checkbox"/> <b>None</b> <table border="1" data-bbox="370 890 1503 1062"> <tr><td>Allelica</td><td>Payment made to me</td></tr> <tr><td></td><td></td></tr> <tr><td></td><td></td></tr> <tr><td></td><td></td></tr> </table>                                                                                                                                                                                                                                                                                                                                                  |  | Allelica | Payment made to me  |             |                     |                           |                     |           |                     |               |                     |          |                     |                 |                     |                |                     |
| Allelica                  | Payment made to me                                                                                           |                                                                                                                                                                                                                                                                                                                                                                                                                                                                                                                                                                                           |  |          |                     |             |                     |                           |                     |           |                     |               |                     |          |                     |                 |                     |                |                     |
|                           |                                                                                                              |                                                                                                                                                                                                                                                                                                                                                                                                                                                                                                                                                                                           |  |          |                     |             |                     |                           |                     |           |                     |               |                     |          |                     |                 |                     |                |                     |
|                           |                                                                                                              |                                                                                                                                                                                                                                                                                                                                                                                                                                                                                                                                                                                           |  |          |                     |             |                     |                           |                     |           |                     |               |                     |          |                     |                 |                     |                |                     |
|                           |                                                                                                              |                                                                                                                                                                                                                                                                                                                                                                                                                                                                                                                                                                                           |  |          |                     |             |                     |                           |                     |           |                     |               |                     |          |                     |                 |                     |                |                     |
| 6                         | Payment for expert testimony                                                                                 | <input checked="" type="checkbox"/> <b>None</b> <table border="1" data-bbox="370 1230 1503 1335"> <tr><td></td><td></td></tr> <tr><td></td><td></td></tr> <tr><td></td><td></td></tr> </table>                                                                                                                                                                                                                                                                                                                                                                                            |  |          |                     |             |                     |                           |                     |           |                     |               |                     |          |                     |                 |                     |                |                     |
|                           |                                                                                                              |                                                                                                                                                                                                                                                                                                                                                                                                                                                                                                                                                                                           |  |          |                     |             |                     |                           |                     |           |                     |               |                     |          |                     |                 |                     |                |                     |
|                           |                                                                                                              |                                                                                                                                                                                                                                                                                                                                                                                                                                                                                                                                                                                           |  |          |                     |             |                     |                           |                     |           |                     |               |                     |          |                     |                 |                     |                |                     |
|                           |                                                                                                              |                                                                                                                                                                                                                                                                                                                                                                                                                                                                                                                                                                                           |  |          |                     |             |                     |                           |                     |           |                     |               |                     |          |                     |                 |                     |                |                     |
| 7                         | Support for attending meetings and/or travel                                                                 | <input checked="" type="checkbox"/> <b>None</b> <table border="1" data-bbox="370 1488 1503 1593"> <tr><td></td><td></td></tr> <tr><td></td><td></td></tr> <tr><td></td><td></td></tr> </table>                                                                                                                                                                                                                                                                                                                                                                                            |  |          |                     |             |                     |                           |                     |           |                     |               |                     |          |                     |                 |                     |                |                     |
|                           |                                                                                                              |                                                                                                                                                                                                                                                                                                                                                                                                                                                                                                                                                                                           |  |          |                     |             |                     |                           |                     |           |                     |               |                     |          |                     |                 |                     |                |                     |
|                           |                                                                                                              |                                                                                                                                                                                                                                                                                                                                                                                                                                                                                                                                                                                           |  |          |                     |             |                     |                           |                     |           |                     |               |                     |          |                     |                 |                     |                |                     |
|                           |                                                                                                              |                                                                                                                                                                                                                                                                                                                                                                                                                                                                                                                                                                                           |  |          |                     |             |                     |                           |                     |           |                     |               |                     |          |                     |                 |                     |                |                     |
| 8                         | Patents planned, issued or pending                                                                           | <input checked="" type="checkbox"/> <b>None</b> <table border="1" data-bbox="370 1747 1503 1852"> <tr><td></td><td></td></tr> <tr><td></td><td></td></tr> <tr><td></td><td></td></tr> </table>                                                                                                                                                                                                                                                                                                                                                                                            |  |          |                     |             |                     |                           |                     |           |                     |               |                     |          |                     |                 |                     |                |                     |
|                           |                                                                                                              |                                                                                                                                                                                                                                                                                                                                                                                                                                                                                                                                                                                           |  |          |                     |             |                     |                           |                     |           |                     |               |                     |          |                     |                 |                     |                |                     |
|                           |                                                                                                              |                                                                                                                                                                                                                                                                                                                                                                                                                                                                                                                                                                                           |  |          |                     |             |                     |                           |                     |           |                     |               |                     |          |                     |                 |                     |                |                     |
|                           |                                                                                                              |                                                                                                                                                                                                                                                                                                                                                                                                                                                                                                                                                                                           |  |          |                     |             |                     |                           |                     |           |                     |               |                     |          |                     |                 |                     |                |                     |
| 9                         | Participation on a Data Safety                                                                               | <input checked="" type="checkbox"/> <b>None</b>                                                                                                                                                                                                                                                                                                                                                                                                                                                                                                                                           |  |          |                     |             |                     |                           |                     |           |                     |               |                     |          |                     |                 |                     |                |                     |

|    |                                                                                                   |                                          |  |
|----|---------------------------------------------------------------------------------------------------|------------------------------------------|--|
|    | Monitoring Board or Advisory Board                                                                |                                          |  |
|    |                                                                                                   |                                          |  |
|    |                                                                                                   |                                          |  |
|    |                                                                                                   |                                          |  |
| 10 | Leadership or fiduciary role in other board, society, committee or advocacy group, paid or unpaid | <input type="checkbox"/> None            |  |
|    |                                                                                                   |                                          |  |
|    |                                                                                                   |                                          |  |
|    |                                                                                                   |                                          |  |
| 11 | Stock or stock options                                                                            | <input type="checkbox"/> None            |  |
|    |                                                                                                   | TenSixteen Bio                           |  |
|    |                                                                                                   |                                          |  |
|    |                                                                                                   |                                          |  |
|    |                                                                                                   |                                          |  |
| 12 | Receipt of equipment, materials, drugs, medical writing, gifts or other services                  | <input checked="" type="checkbox"/> None |  |
|    |                                                                                                   |                                          |  |
|    |                                                                                                   |                                          |  |
|    |                                                                                                   |                                          |  |
|    |                                                                                                   |                                          |  |
| 13 | Other financial or non-financial interests                                                        | <input type="checkbox"/> None            |  |
|    |                                                                                                   | Spouse employed by Vertex                |  |
|    |                                                                                                   |                                          |  |
|    |                                                                                                   |                                          |  |
|    |                                                                                                   |                                          |  |

Please place an "X" next to the following statement to indicate your agreement:

☒ I certify that I have answered every question and have not altered the wording of any of the questions on this form.

## ICMJE DISCLOSURE FORM

**Date:** 12/10/2021

**Your Name:** Alexander Bick

**Manuscript Title:** Clonal Hematopoiesis in Sickle Cell Disease

**Manuscript Number (if known):** 156060-JCI-CMED-RV-2

In the interest of transparency, we ask you to disclose all relationships/activities/interests listed below that are related to the content of your manuscript. "Related" means any relation with for-profit or not-for-profit third parties whose interests may be affected by the content of the manuscript. Disclosure represents a commitment to transparency and does not necessarily indicate a bias. If you are in doubt about whether to list a relationship/activity/interest, it is preferable that you do so.

The author's relationships/activities/interests should be defined broadly. For example, if your manuscript pertains to the epidemiology of hypertension, you should declare all relationships with manufacturers of antihypertensive medication, even if that medication is not mentioned in the manuscript.

In item #1 below, report all support for the work reported in this manuscript without time limit. For all other items, the time frame for disclosure is the past 36 months.

|                                                           |                                                                                                                                                                                | Name all entities with whom you have this relationship or indicate none (add rows as needed)                                                                                                                                                                                                                                                                                                            | Specifications/Comments (e.g., if payments were made to you or to your institution) |  |  |  |  |  |  |
|-----------------------------------------------------------|--------------------------------------------------------------------------------------------------------------------------------------------------------------------------------|---------------------------------------------------------------------------------------------------------------------------------------------------------------------------------------------------------------------------------------------------------------------------------------------------------------------------------------------------------------------------------------------------------|-------------------------------------------------------------------------------------|--|--|--|--|--|--|
| <b>Time frame: Since the initial planning of the work</b> |                                                                                                                                                                                |                                                                                                                                                                                                                                                                                                                                                                                                         |                                                                                     |  |  |  |  |  |  |
| <b>1</b>                                                  | All support for the present manuscript (e.g., funding, provision of study materials, medical writing, article processing charges, etc.)<br><b>No time limit for this item.</b> | <div style="padding: 5px;"> <input checked="" type="checkbox"/> <b>None</b> </div> <table border="1" style="width: 100%; border-collapse: collapse; margin-top: 5px;"> <tr><td style="height: 20px;"></td><td style="height: 20px;"></td></tr> <tr><td style="height: 20px;"></td><td style="height: 20px;"></td></tr> <tr><td style="height: 20px;"></td><td style="height: 20px;"></td></tr> </table> |                                                                                     |  |  |  |  |  |  |
|                                                           |                                                                                                                                                                                |                                                                                                                                                                                                                                                                                                                                                                                                         |                                                                                     |  |  |  |  |  |  |
|                                                           |                                                                                                                                                                                |                                                                                                                                                                                                                                                                                                                                                                                                         |                                                                                     |  |  |  |  |  |  |
|                                                           |                                                                                                                                                                                |                                                                                                                                                                                                                                                                                                                                                                                                         |                                                                                     |  |  |  |  |  |  |
| <b>Time frame: past 36 months</b>                         |                                                                                                                                                                                |                                                                                                                                                                                                                                                                                                                                                                                                         |                                                                                     |  |  |  |  |  |  |
| <b>2</b>                                                  | Grants or contracts from any entity (if not indicated in item #1 above).                                                                                                       | <div style="padding: 5px;"> <input checked="" type="checkbox"/> <b>None</b> </div> <table border="1" style="width: 100%; border-collapse: collapse; margin-top: 5px;"> <tr><td style="height: 20px;"></td><td style="height: 20px;"></td></tr> <tr><td style="height: 20px;"></td><td style="height: 20px;"></td></tr> <tr><td style="height: 20px;"></td><td style="height: 20px;"></td></tr> </table> |                                                                                     |  |  |  |  |  |  |
|                                                           |                                                                                                                                                                                |                                                                                                                                                                                                                                                                                                                                                                                                         |                                                                                     |  |  |  |  |  |  |
|                                                           |                                                                                                                                                                                |                                                                                                                                                                                                                                                                                                                                                                                                         |                                                                                     |  |  |  |  |  |  |
|                                                           |                                                                                                                                                                                |                                                                                                                                                                                                                                                                                                                                                                                                         |                                                                                     |  |  |  |  |  |  |
| <b>3</b>                                                  | Royalties or licenses                                                                                                                                                          | <div style="padding: 5px;"> <input checked="" type="checkbox"/> <b>None</b> </div> <table border="1" style="width: 100%; border-collapse: collapse; margin-top: 5px;"> <tr><td style="height: 20px;"></td><td style="height: 20px;"></td></tr> <tr><td style="height: 20px;"></td><td style="height: 20px;"></td></tr> <tr><td style="height: 20px;"></td><td style="height: 20px;"></td></tr> </table> |                                                                                     |  |  |  |  |  |  |
|                                                           |                                                                                                                                                                                |                                                                                                                                                                                                                                                                                                                                                                                                         |                                                                                     |  |  |  |  |  |  |
|                                                           |                                                                                                                                                                                |                                                                                                                                                                                                                                                                                                                                                                                                         |                                                                                     |  |  |  |  |  |  |
|                                                           |                                                                                                                                                                                |                                                                                                                                                                                                                                                                                                                                                                                                         |                                                                                     |  |  |  |  |  |  |

|                |                                                                                                              |                                                                                                                                                                                                                                                                                                                                                                                                                                                                                  |  |                |       |  |  |  |  |  |  |
|----------------|--------------------------------------------------------------------------------------------------------------|----------------------------------------------------------------------------------------------------------------------------------------------------------------------------------------------------------------------------------------------------------------------------------------------------------------------------------------------------------------------------------------------------------------------------------------------------------------------------------|--|----------------|-------|--|--|--|--|--|--|
| 4              | Consulting fees                                                                                              | <input type="checkbox"/> <b>None</b> <table border="1" data-bbox="370 205 1507 342"> <tr> <td data-bbox="370 205 943 237">TenSixteen Bio</td> <td data-bbox="943 205 1507 237">To Me</td> </tr> <tr> <td data-bbox="370 237 943 268"></td> <td data-bbox="943 237 1507 268"></td> </tr> <tr> <td data-bbox="370 268 943 300"></td> <td data-bbox="943 268 1507 300"></td> </tr> <tr> <td data-bbox="370 300 943 342"></td> <td data-bbox="943 300 1507 342"></td> </tr> </table> |  | TenSixteen Bio | To Me |  |  |  |  |  |  |
| TenSixteen Bio | To Me                                                                                                        |                                                                                                                                                                                                                                                                                                                                                                                                                                                                                  |  |                |       |  |  |  |  |  |  |
|                |                                                                                                              |                                                                                                                                                                                                                                                                                                                                                                                                                                                                                  |  |                |       |  |  |  |  |  |  |
|                |                                                                                                              |                                                                                                                                                                                                                                                                                                                                                                                                                                                                                  |  |                |       |  |  |  |  |  |  |
|                |                                                                                                              |                                                                                                                                                                                                                                                                                                                                                                                                                                                                                  |  |                |       |  |  |  |  |  |  |
| 5              | Payment or honoraria for lectures, presentations, speakers bureaus, manuscript writing or educational events | <input checked="" type="checkbox"/> <b>None</b> <table border="1" data-bbox="370 493 1507 596"> <tr> <td data-bbox="370 493 943 525"></td> <td data-bbox="943 493 1507 525"></td> </tr> <tr> <td data-bbox="370 525 943 556"></td> <td data-bbox="943 525 1507 556"></td> </tr> <tr> <td data-bbox="370 556 943 596"></td> <td data-bbox="943 556 1507 596"></td> </tr> </table>                                                                                                 |  |                |       |  |  |  |  |  |  |
|                |                                                                                                              |                                                                                                                                                                                                                                                                                                                                                                                                                                                                                  |  |                |       |  |  |  |  |  |  |
|                |                                                                                                              |                                                                                                                                                                                                                                                                                                                                                                                                                                                                                  |  |                |       |  |  |  |  |  |  |
|                |                                                                                                              |                                                                                                                                                                                                                                                                                                                                                                                                                                                                                  |  |                |       |  |  |  |  |  |  |
| 6              | Payment for expert testimony                                                                                 | <input checked="" type="checkbox"/> <b>None</b> <table border="1" data-bbox="370 831 1507 934"> <tr> <td data-bbox="370 831 943 863"></td> <td data-bbox="943 831 1507 863"></td> </tr> <tr> <td data-bbox="370 863 943 894"></td> <td data-bbox="943 863 1507 894"></td> </tr> <tr> <td data-bbox="370 894 943 934"></td> <td data-bbox="943 894 1507 934"></td> </tr> </table>                                                                                                 |  |                |       |  |  |  |  |  |  |
|                |                                                                                                              |                                                                                                                                                                                                                                                                                                                                                                                                                                                                                  |  |                |       |  |  |  |  |  |  |
|                |                                                                                                              |                                                                                                                                                                                                                                                                                                                                                                                                                                                                                  |  |                |       |  |  |  |  |  |  |
|                |                                                                                                              |                                                                                                                                                                                                                                                                                                                                                                                                                                                                                  |  |                |       |  |  |  |  |  |  |
| 7              | Support for attending meetings and/or travel                                                                 | <input checked="" type="checkbox"/> <b>None</b> <table border="1" data-bbox="370 1089 1507 1192"> <tr> <td data-bbox="370 1089 943 1121"></td> <td data-bbox="943 1089 1507 1121"></td> </tr> <tr> <td data-bbox="370 1121 943 1152"></td> <td data-bbox="943 1121 1507 1152"></td> </tr> <tr> <td data-bbox="370 1152 943 1192"></td> <td data-bbox="943 1152 1507 1192"></td> </tr> </table>                                                                                   |  |                |       |  |  |  |  |  |  |
|                |                                                                                                              |                                                                                                                                                                                                                                                                                                                                                                                                                                                                                  |  |                |       |  |  |  |  |  |  |
|                |                                                                                                              |                                                                                                                                                                                                                                                                                                                                                                                                                                                                                  |  |                |       |  |  |  |  |  |  |
|                |                                                                                                              |                                                                                                                                                                                                                                                                                                                                                                                                                                                                                  |  |                |       |  |  |  |  |  |  |
| 8              | Patents planned, issued or pending                                                                           | <input checked="" type="checkbox"/> <b>None</b> <table border="1" data-bbox="370 1346 1507 1449"> <tr> <td data-bbox="370 1346 943 1377"></td> <td data-bbox="943 1346 1507 1377"></td> </tr> <tr> <td data-bbox="370 1377 943 1409"></td> <td data-bbox="943 1377 1507 1409"></td> </tr> <tr> <td data-bbox="370 1409 943 1449"></td> <td data-bbox="943 1409 1507 1449"></td> </tr> </table>                                                                                   |  |                |       |  |  |  |  |  |  |
|                |                                                                                                              |                                                                                                                                                                                                                                                                                                                                                                                                                                                                                  |  |                |       |  |  |  |  |  |  |
|                |                                                                                                              |                                                                                                                                                                                                                                                                                                                                                                                                                                                                                  |  |                |       |  |  |  |  |  |  |
|                |                                                                                                              |                                                                                                                                                                                                                                                                                                                                                                                                                                                                                  |  |                |       |  |  |  |  |  |  |
| 9              | Participation on a Data Safety Monitoring Board or Advisory Board                                            | <input checked="" type="checkbox"/> <b>None</b> <table border="1" data-bbox="370 1604 1507 1707"> <tr> <td data-bbox="370 1604 943 1635"></td> <td data-bbox="943 1604 1507 1635"></td> </tr> <tr> <td data-bbox="370 1635 943 1667"></td> <td data-bbox="943 1635 1507 1667"></td> </tr> <tr> <td data-bbox="370 1667 943 1707"></td> <td data-bbox="943 1667 1507 1707"></td> </tr> </table>                                                                                   |  |                |       |  |  |  |  |  |  |
|                |                                                                                                              |                                                                                                                                                                                                                                                                                                                                                                                                                                                                                  |  |                |       |  |  |  |  |  |  |
|                |                                                                                                              |                                                                                                                                                                                                                                                                                                                                                                                                                                                                                  |  |                |       |  |  |  |  |  |  |
|                |                                                                                                              |                                                                                                                                                                                                                                                                                                                                                                                                                                                                                  |  |                |       |  |  |  |  |  |  |
| 10             | Leadership or fiduciary role in other board, society, committee or                                           | <input checked="" type="checkbox"/> <b>None</b> <table border="1" data-bbox="370 1862 1507 1965"> <tr> <td data-bbox="370 1862 943 1894"></td> <td data-bbox="943 1862 1507 1894"></td> </tr> <tr> <td data-bbox="370 1894 943 1925"></td> <td data-bbox="943 1894 1507 1925"></td> </tr> <tr> <td data-bbox="370 1925 943 1965"></td> <td data-bbox="943 1925 1507 1965"></td> </tr> </table>                                                                                   |  |                |       |  |  |  |  |  |  |
|                |                                                                                                              |                                                                                                                                                                                                                                                                                                                                                                                                                                                                                  |  |                |       |  |  |  |  |  |  |
|                |                                                                                                              |                                                                                                                                                                                                                                                                                                                                                                                                                                                                                  |  |                |       |  |  |  |  |  |  |
|                |                                                                                                              |                                                                                                                                                                                                                                                                                                                                                                                                                                                                                  |  |                |       |  |  |  |  |  |  |

|                                                                                                                                                                                                                                                               |                                                                                                 |                                                 |       |
|---------------------------------------------------------------------------------------------------------------------------------------------------------------------------------------------------------------------------------------------------------------|-------------------------------------------------------------------------------------------------|-------------------------------------------------|-------|
|                                                                                                                                                                                                                                                               | advocacy group,<br>paid or unpaid                                                               |                                                 |       |
| 11                                                                                                                                                                                                                                                            | Stock or stock<br>options                                                                       | <input type="checkbox"/> <b>None</b>            |       |
|                                                                                                                                                                                                                                                               |                                                                                                 | TenSixteen Bio                                  | To Me |
|                                                                                                                                                                                                                                                               |                                                                                                 |                                                 |       |
|                                                                                                                                                                                                                                                               |                                                                                                 |                                                 |       |
| 12                                                                                                                                                                                                                                                            | Receipt of<br>equipment,<br>materials, drugs,<br>medical writing,<br>gifts or other<br>services | <input checked="" type="checkbox"/> <b>None</b> |       |
|                                                                                                                                                                                                                                                               |                                                                                                 |                                                 |       |
|                                                                                                                                                                                                                                                               |                                                                                                 |                                                 |       |
|                                                                                                                                                                                                                                                               |                                                                                                 |                                                 |       |
| 13                                                                                                                                                                                                                                                            | Other financial<br>or non-financial<br>interests                                                | <input checked="" type="checkbox"/> <b>None</b> |       |
|                                                                                                                                                                                                                                                               |                                                                                                 |                                                 |       |
|                                                                                                                                                                                                                                                               |                                                                                                 |                                                 |       |
|                                                                                                                                                                                                                                                               |                                                                                                 |                                                 |       |
| <p><b>Please place an "X" next to the following statement to indicate your agreement:</b></p> <p><input checked="" type="checkbox"/> I certify that I have answered every question and have not altered the wording of any of the questions on this form.</p> |                                                                                                 |                                                 |       |



## ICMJE DISCLOSURE FORM

**Date:** 12/9/2021

**Your Name:** Vijay G. Sankaran

**Manuscript Title:** Clonal Hematopoiesis in Sickle Cell Disease

**Manuscript Number (if known):** 156060-JCI-CMED-RV-2

In the interest of transparency, we ask you to disclose all relationships/activities/interests listed below that are related to the content of your manuscript. "Related" means any relation with for-profit or not-for-profit third parties whose interests may be affected by the content of the manuscript. Disclosure represents a commitment to transparency and does not necessarily indicate a bias. If you are in doubt about whether to list a relationship/activity/interest, it is preferable that you do so.

The author's relationships/activities/interests should be defined broadly. For example, if your manuscript pertains to the epidemiology of hypertension, you should declare all relationships with manufacturers of antihypertensive medication, even if that medication is not mentioned in the manuscript.

In item #1 below, report all support for the work reported in this manuscript without time limit. For all other items, the time frame for disclosure is the past 36 months.

|                                                           |                                                                                                                                                                                | Name all entities with whom you have this relationship or indicate none (add rows as needed)                                                                                                                                                                                                                                                                                                                                                                                               | Specifications/Comments (e.g., if payments were made to you or to your institution) |                                          |  |                               |  |  |  |
|-----------------------------------------------------------|--------------------------------------------------------------------------------------------------------------------------------------------------------------------------------|--------------------------------------------------------------------------------------------------------------------------------------------------------------------------------------------------------------------------------------------------------------------------------------------------------------------------------------------------------------------------------------------------------------------------------------------------------------------------------------------|-------------------------------------------------------------------------------------|------------------------------------------|--|-------------------------------|--|--|--|
| <b>Time frame: Since the initial planning of the work</b> |                                                                                                                                                                                |                                                                                                                                                                                                                                                                                                                                                                                                                                                                                            |                                                                                     |                                          |  |                               |  |  |  |
| 1                                                         | All support for the present manuscript (e.g., funding, provision of study materials, medical writing, article processing charges, etc.)<br><b>No time limit for this item.</b> | <div style="display: flex; align-items: flex-start;"> <div style="margin-right: 10px;"><input type="checkbox"/> <b>None</b></div> <table border="1" style="width: 100%; border-collapse: collapse;"> <tr> <td style="padding: 2px 5px;">NIH grants R01 DK103794 and R01 HL146500</td> <td style="width: 150px;"></td> </tr> <tr> <td style="padding: 2px 5px;">New York Stem Cell Foundation</td> <td></td> </tr> <tr> <td style="padding: 2px 5px;"></td> <td></td> </tr> </table> </div> |                                                                                     | NIH grants R01 DK103794 and R01 HL146500 |  | New York Stem Cell Foundation |  |  |  |
| NIH grants R01 DK103794 and R01 HL146500                  |                                                                                                                                                                                |                                                                                                                                                                                                                                                                                                                                                                                                                                                                                            |                                                                                     |                                          |  |                               |  |  |  |
| New York Stem Cell Foundation                             |                                                                                                                                                                                |                                                                                                                                                                                                                                                                                                                                                                                                                                                                                            |                                                                                     |                                          |  |                               |  |  |  |
|                                                           |                                                                                                                                                                                |                                                                                                                                                                                                                                                                                                                                                                                                                                                                                            |                                                                                     |                                          |  |                               |  |  |  |
| <b>Time frame: past 36 months</b>                         |                                                                                                                                                                                |                                                                                                                                                                                                                                                                                                                                                                                                                                                                                            |                                                                                     |                                          |  |                               |  |  |  |
| 2                                                         | Grants or contracts from any entity (if not indicated in item #1 above).                                                                                                       | <div style="display: flex; align-items: flex-start;"> <div style="margin-right: 10px;"><input checked="" type="checkbox"/> <b>None</b></div> <table border="1" style="width: 100%; border-collapse: collapse;"> <tr><td style="height: 20px;"></td><td></td></tr> <tr><td style="height: 20px;"></td><td></td></tr> <tr><td style="height: 20px;"></td><td></td></tr> </table> </div>                                                                                                      |                                                                                     |                                          |  |                               |  |  |  |
|                                                           |                                                                                                                                                                                |                                                                                                                                                                                                                                                                                                                                                                                                                                                                                            |                                                                                     |                                          |  |                               |  |  |  |
|                                                           |                                                                                                                                                                                |                                                                                                                                                                                                                                                                                                                                                                                                                                                                                            |                                                                                     |                                          |  |                               |  |  |  |
|                                                           |                                                                                                                                                                                |                                                                                                                                                                                                                                                                                                                                                                                                                                                                                            |                                                                                     |                                          |  |                               |  |  |  |
| 3                                                         | Royalties or licenses                                                                                                                                                          | <div style="display: flex; align-items: flex-start;"> <div style="margin-right: 10px;"><input checked="" type="checkbox"/> <b>None</b></div> <table border="1" style="width: 100%; border-collapse: collapse;"> <tr><td style="height: 20px;"></td><td></td></tr> <tr><td style="height: 20px;"></td><td></td></tr> <tr><td style="height: 20px;"></td><td></td></tr> </table> </div>                                                                                                      |                                                                                     |                                          |  |                               |  |  |  |
|                                                           |                                                                                                                                                                                |                                                                                                                                                                                                                                                                                                                                                                                                                                                                                            |                                                                                     |                                          |  |                               |  |  |  |
|                                                           |                                                                                                                                                                                |                                                                                                                                                                                                                                                                                                                                                                                                                                                                                            |                                                                                     |                                          |  |                               |  |  |  |
|                                                           |                                                                                                                                                                                |                                                                                                                                                                                                                                                                                                                                                                                                                                                                                            |                                                                                     |                                          |  |                               |  |  |  |

|    |                                                                                                              |                                                                                                                                                                                                                                   |  |
|----|--------------------------------------------------------------------------------------------------------------|-----------------------------------------------------------------------------------------------------------------------------------------------------------------------------------------------------------------------------------|--|
| 4  | Consulting fees                                                                                              | <input type="checkbox"/> <b>None</b><br><div> <div>V.G.S. serves as an advisor to Novartis, Forma, Cellarity, Ensoma, and Branch Biosciences, all unrelated to the present work.</div> <div></div> <div></div> <div></div> </div> |  |
| 5  | Payment or honoraria for lectures, presentations, speakers bureaus, manuscript writing or educational events | <input checked="" type="checkbox"/> <b>None</b><br><div> <div></div> <div></div> <div></div> </div>                                                                                                                               |  |
| 6  | Payment for expert testimony                                                                                 | <input checked="" type="checkbox"/> <b>None</b><br><div> <div></div> <div></div> <div></div> </div>                                                                                                                               |  |
| 7  | Support for attending meetings and/or travel                                                                 | <input checked="" type="checkbox"/> <b>None</b><br><div> <div></div> <div></div> <div></div> </div>                                                                                                                               |  |
| 8  | Patents planned, issued or pending                                                                           | <input checked="" type="checkbox"/> <b>None</b><br><div> <div></div> <div></div> <div></div> </div>                                                                                                                               |  |
| 9  | Participation on a Data Safety Monitoring Board or Advisory Board                                            | <input checked="" type="checkbox"/> <b>None</b><br><div> <div></div> <div></div> <div></div> </div>                                                                                                                               |  |
| 10 | Leadership or fiduciary role in other board, society,                                                        | <input checked="" type="checkbox"/> <b>None</b><br><div> <div></div> </div>                                                                                                                                                       |  |

|                                                                                                                                                                                                                                                               |                                                                                  |                                                 |  |
|---------------------------------------------------------------------------------------------------------------------------------------------------------------------------------------------------------------------------------------------------------------|----------------------------------------------------------------------------------|-------------------------------------------------|--|
|                                                                                                                                                                                                                                                               | committee or advocacy group, paid or unpaid                                      |                                                 |  |
| 11                                                                                                                                                                                                                                                            | Stock or stock options                                                           | <input checked="" type="checkbox"/> <b>None</b> |  |
|                                                                                                                                                                                                                                                               |                                                                                  |                                                 |  |
|                                                                                                                                                                                                                                                               |                                                                                  |                                                 |  |
|                                                                                                                                                                                                                                                               |                                                                                  |                                                 |  |
| 12                                                                                                                                                                                                                                                            | Receipt of equipment, materials, drugs, medical writing, gifts or other services | <input checked="" type="checkbox"/> <b>None</b> |  |
|                                                                                                                                                                                                                                                               |                                                                                  |                                                 |  |
|                                                                                                                                                                                                                                                               |                                                                                  |                                                 |  |
|                                                                                                                                                                                                                                                               |                                                                                  |                                                 |  |
| 13                                                                                                                                                                                                                                                            | Other financial or non-financial interests                                       | <input checked="" type="checkbox"/> <b>None</b> |  |
|                                                                                                                                                                                                                                                               |                                                                                  |                                                 |  |
|                                                                                                                                                                                                                                                               |                                                                                  |                                                 |  |
|                                                                                                                                                                                                                                                               |                                                                                  |                                                 |  |
| <p><b>Please place an "X" next to the following statement to indicate your agreement:</b></p> <p><input checked="" type="checkbox"/> I certify that I have answered every question and have not altered the wording of any of the questions on this form.</p> |                                                                                  |                                                 |  |
